# Supplementary material
Source: PubMed Central journal article supplement (PMC8387438)
Supplement: NIHMS1717797-supplement-Supple_data.pdf [file NIHMS1717797-supplement-Supple_data.pdf]

List A. Lipids associated with metastatic relapse in localised prostate cancer

| cox<br>reg<br>rank | Lipid type                        | Lipid name                      | Hazard<br>ratio | lower<br>95%<br>CI | upper<br>95%<br>CI | Hazard<br>ratio P-<br>value | t-test<br>Profile L2<br>vs others P-<br>value | fold,<br>Profile<br>L2/<br>others |
|--------------------|-----------------------------------|---------------------------------|-----------------|--------------------|--------------------|-----------------------------|-----------------------------------------------|-----------------------------------|
| 1                  | acylcarnitine                     | AC(16:1)                        | 3.35            | 1.83               | 6.13               | 6.16E-05                    | 2.3E-17                                       | 1.90                              |
| 2                  | dihydroceramide                   | Cer(d18:0/18:0)                 | 2.14            | 1.44               | 3.16               | 9.95E-05                    | 3.1E-20                                       | 2.78                              |
| 3                  | acylcarnitine                     | AC(16:0)                        | 5.21            | 2.00               | 13.60              | 5.62E-04                    | 4.8E-13                                       | 1.44                              |
| 4                  | acylcarnitine                     | AC(18:1)                        | 3.41            | 1.64               | 7.09               | 8.78E-04                    | 2.9E-11                                       | 1.59                              |
| 5                  | dihydroceramide                   | Cer(d18:0/20:0)                 | 3.27            | 1.60               | 6.68               | 1.11E-03                    | 2.4E-10                                       | 1.56                              |
| 6                  | alkenylphosphatidylethanolamine   | PE(P-15:0/20:4) (b)             | 0.49            | 0.33               | 0.74               | 1.12E-03                    | 1.3E-01                                       | 0.73                              |
| 7                  | acylcarnitine                     | AC(14:1)                        | 2.00            | 1.30               | 3.07               | 1.41E-03                    | 2.7E-15                                       | 2.22                              |
| 8                  | ceramide                          | Cer(d20:1/24:0)                 | 3.42            | 1.57               | 7.43               | 1.64E-03                    | 1.7E-06                                       | 1.42                              |
| 9                  | ceramide                          | Cer(d20:1/24:1)                 | 2.52            | 1.40               | 4.54               | 2.31E-03                    | 4.5E-17                                       | 1.92                              |
| 10                 | alkylphosphatidylethanolamine     | PE(O-16:0/18:2)                 | 0.42            | 0.24               | 0.72               | 2.55E-03                    | 2.1E-06                                       | 0.57                              |
| 11                 | phosphoinositol                   | PI(18:0_22:5) (n3)              | 3.02            | 1.47               | 6.17               | 3.10E-03                    | 2.2E-01                                       | 1.22                              |
| 12                 | ceramide                          | Cer(d20:1/22:0)                 | 2.59            | 1.37               | 4.92               | 3.14E-03                    | 1.4E-08                                       | 1.58                              |
| 13                 | acylcarnitine                     | AC(14:2)                        | 2.30            | 1.29               | 4.10               | 3.37E-03                    | 9.0E-12                                       | 1.79                              |
| 14                 | dihydroceramide                   | Cer(d18:0/24:1)                 | 2.42            | 1.37               | 4.27               | 3.43E-03                    | 4.8E-11                                       | 1.73                              |
| 15                 | alkenylphosphatidylethanolamine   | PE(P-18:1/22:4)                 | 0.37            | 0.20               | 0.70               | 3.66E-03                    | 8.9E-01                                       | 0.87                              |
| 16                 | acylcarnitine                     | AC(14:0)                        | 2.50            | 1.36               | 4.61               | 3.72E-03                    | 6.7E-11                                       | 1.53                              |
| 17                 | sphingomyelin                     | SM(d18:2/23:0)                  | 0.24            | 0.09               | 0.61               | 4.44E-03                    | 6.3E-14                                       | 0.72                              |
| 18                 | alkylphosphatidylethanolamine     | PE(O-38:5)                      | 0.36            | 0.17               | 0.74               | 5.20E-03                    | 1.6E-01                                       | 0.76                              |
| 19                 | ceramide                          | Cer(d18:1/18:0)                 | 2.61            | 1.34               | 5.07               | 5.25E-03                    | 1.4E-20                                       | 1.77                              |
| 20                 | triacylglycerol                   | TG(16:0_18:1_18:1)              | 2.28            | 1.21               | 4.28               | 8.24E-03                    | 1.1E-38                                       | 2.17                              |
| 21                 | phosphatidylethanolamine          | PE(17:0_20:4)                   | 0.49            | 0.28               | 0.85               | 9.89E-03                    | 1.1E-01                                       | 0.73                              |
| 22                 | lysophosphatidylcholine           | LPC(14:0) [sn2]                 | 0.39            | 0.19               | 0.81               | 1.16E-02                    | 6.5E-05                                       | 0.79                              |
| 23                 | acylcarnitine                     | AC(18:0)                        | 3.13            | 1.29               | 7.63               | 1.18E-02                    | 1.3E-06                                       | 1.25                              |
| 24                 | alkylphosphatidylethanolamine     | PE(O-38:4)                      | 0.50            | 0.29               | 0.88               | 1.31E-02                    | 1.8E-01                                       | 0.73                              |
| 25                 | phosphatidylcholine               | PC(16:0_18:1)                   | 6.64            | 1.52               | 28.91              | 1.32E-02                    | 4.9E-06                                       | 1.18                              |
| 26                 | phosphatidylcholine               | PC(14:0_20:4)                   | 0.42            | 0.21               | 0.84               | 1.38E-02                    | 7.9E-02                                       | 0.88                              |
| 27                 | lysophosphatidylcholine           | LPC(19:0) [sn1] (b)             | 0.36            | 0.16               | 0.82               | 1.47E-02                    | 1.4E-12                                       | 0.68                              |
| 28                 | triacylglycerol                   | TG(18:1_18:1_18:1)              | 1.79            | 1.11               | 2.90               | 1.48E-02                    | 5.4E-28                                       | 2.30                              |
| 29                 | alkylphosphatidylethanolamine     | PE(O-34:1)                      | 0.38            | 0.18               | 0.84               | 1.51E-02                    | 4.7E-06                                       | 0.68                              |
| 30                 | sphingomyelin                     | SM(43:2) (c)                    | 0.24            | 0.08               | 0.76               | 1.52E-02                    | 3.9E-11                                       | 0.79                              |
| 31                 | ceramide                          | Cer(d17:1/18:0)                 | 2.29            | 1.16               | 4.51               | 1.56E-02                    | 1.8E-10                                       | 1.50                              |
| 32                 | diacylglycerol                    | DG(18:1_18:1)                   | 1.84            | 1.11               | 3.06               | 1.56E-02                    | 3.0E-33                                       | 2.34                              |
| 33                 | alkenylphosphatidylethanolamine   | PE(P-16:0/18:2)                 | 0.42            | 0.22               | 0.83               | 1.56E-02                    | 2.9E-09                                       | 0.58                              |
| 34                 | phosphoinositol                   | PI(18:0_22:6)                   | 2.05            | 1.15               | 3.68               | 1.64E-02                    | 9.7E-01                                       | 1.20                              |
| 35                 | triacylglycerol                   | TG(16:0_18:1_18:2)              | 3.23            | 1.20               | 8.71               | 1.70E-02                    | 4.0E-13                                       | 1.44                              |
| 36                 | alkenylphosphatidylethanolamine   | PE(P-15:0/20:4) (a)             | 0.65            | 0.47               | 0.92               | 1.79E-02                    | 4.0E-02                                       | 0.65                              |
| 37                 | alkylphosphatidylethanolamine     | PE(O-16:0/20:3)                 | 0.46            | 0.25               | 0.86               | 1.86E-02                    | 1.2E-10                                       | 0.57                              |
| 38                 | lysophosphatidylcholine           | LPC(15:0) [sn2]                 | 0.37            | 0.16               | 0.86               | 1.89E-02                    | 3.9E-06                                       | 0.75                              |
| 39                 | ceramide                          | Cer(d18:1/24:1)                 | 3.69            | 1.23               | 11.07              | 1.90E-02                    | 3.7E-11                                       | 1.31                              |
| 40                 | triacylglycerol                   | TG(18:0_18:1_18:1)              | 1.69            | 1.09               | 2.64               | 1.91E-02                    | 4.1E-24                                       | 2.19                              |
| 41                 | lysophosphatidylcholine           | LPC(14:0) [sn1]                 | 0.41            | 0.20               | 0.87               | 1.92E-02                    | 1.3E-04                                       | 0.80                              |
| 42                 | alkylphosphatidylcholine          | PC(O-34:2) (b)                  | 0.39            | 0.17               | 0.86               | 1.93E-02                    | 1.1E-14                                       | 0.59                              |
| 43                 | ceramide                          | Cer(d19:1/18:0)                 | 1.63            | 1.07               | 2.48               | 1.96E-02                    | 2.9E-14                                       | 2.13                              |
| 44                 | alkylphosphatidylethanolamine     | PE(O-16:0/20:4)                 | 0.55            | 0.33               | 0.91               | 1.97E-02                    | 5.5E-01                                       | 0.75                              |
| 45                 | lysoalkenylphosphatidylethanolami | LPE(P-18:1)                     | 0.42            | 0.20               | 0.87               | 2.00E-02                    | 2.2E-03                                       | 0.78                              |
| 46                 | alkylphosphatidylethanolamine     | PE(O-18:0/22:5) (a)             | 0.43            | 0.21               | 0.87               | 2.03E-02                    | 5.1E-02                                       | 0.73                              |
| 47                 | triacylglycerol                   | TG 56:8_NL 20:5                 | 2.26            | 1.13               | 4.53               | 2.04E-02                    | 1.3E-06                                       | 1.38                              |
| 48                 | acylcarnitine                     | AC(12:0)                        | 1.62            | 1.08               | 2.42               | 2.14E-02                    | 8.3E-10                                       | 1.78                              |
| 49                 | ceramide                          | Cer(d19:1/24:1)                 | 2.07            | 1.09               | 3.93               | 2.24E-02                    | 8.3E-15                                       | 1.55                              |
| 50                 | ceramide                          | Cer(d18:2/18:0)                 | 2.00            | 1.09               | 3.66               | 2.27E-02                    | 1.2E-10                                       | 1.67                              |
| 51                 | triacylglycerol                   | TG(18:1_18:1_18:2)              | 1.89            | 1.08               | 3.30               | 2.35E-02                    | 1.1E-07                                       | 1.49                              |
| 52                 | ceramide                          | Cer(d18:2/21:0)                 | 1.47            | 1.03               | 2.11               | 2.40E-02                    | 3.5E-01                                       | 1.14                              |
| 53                 | alkenylphosphatidylethanolamine   | PE(P-18:1/18:2) (a)             | 0.47            | 0.25               | 0.90               | 2.43E-02                    | 6.3E-11                                       | 0.57                              |
| 54                 | lysophosphatidylcholine           | LPC(19:0) [sn1] (a) / LPC(19:0) | 0.37            | 0.16               | 0.88               | 2.44E-02                    | 2.9E-08                                       | 0.73                              |
| 55                 | phosphatidylcholine               | PC(18:2_18:2)                   | 0.50            | 0.28               | 0.91               | 2.49E-02                    | 2.4E-18                                       | 0.54                              |
| 56                 | ceramide                          | Cer(d18:1/17:0)                 | 0.47            | 0.25               | 0.90               | 2.61E-02                    | 7.2E-01                                       | 0.99                              |
| 57                 | dihydroceramide                   | Cer(d18:0/24:0)                 | 2.10            | 1.11               | 3.97               | 2.62E-02                    | 2.9E-03                                       | 1.31                              |
| 58                 | lysophosphatidylcholine           | LPC(18:2) [sn2]                 | 0.36            | 0.14               | 0.88               | 2.63E-02                    | 1.1E-22                                       | 0.68                              |
| 59                 | phosphatidylcholine               | PC(16:0_22:6)                   | 2.51            | 1.11               | 5.70               | 2.70E-02                    | 2.2E-01                                       | 1.25                              |
| 60                 | alkenylphosphatidylethanolamine   | PE(P-16:0/22:4)                 | 0.49            | 0.26               | 0.90               | 2.79E-02                    | 4.5E-01                                       | 0.88                              |
| 61                 | sphingomyelin                     | SM(34:3)                        | 0.29            | 0.09               | 0.88               | 2.80E-02                    | 1.5E-04                                       | 0.82                              |
| 62                 | lysoalkenylphosphatidylethanolami | LPE(P-16:0)                     | 0.35            | 0.14               | 0.91               | 2.86E-02                    | 5.9E-03                                       | 0.85                              |
| 63                 | alkylphosphatidylcholine          | PC(O-35:4)                      | 0.57            | 0.34               | 0.95               | 3.08E-02                    | 1.1E-01                                       | 0.76                              |
| 64                 | lysoalkenylphosphatidylethanolami | LPE(P-18:0)                     | 0.39            | 0.16               | 0.93               | 3.15E-02                    | 3.0E-03                                       | 0.80                              |
| 65                 | sphingomyelin                     | SM(d18:1/23:0)/SM(d17:1/22:0)   | 0.27            | 0.08               | 0.88               | 3.29E-02                    | 2.2E-09                                       | 0.83                              |
| 66                 | lysophosphatidylethanolamine      | LPE(22:6)                       | 2.13            | 1.06               | 4.31               | 3.47E-02                    | 4.2E-01                                       | 1.20                              |
| 67                 | phosphatidylcholine               | PC(38:5) (a)                    | 3.24            | 1.10               | 9.53               | 3.51E-02                    | 7.6E-06                                       | 1.26                              |
| 68                 | alkylphosphatidylcholine          | PC(O-16:0/20:3)                 | 0.39            | 0.17               | 0.92               | 3.54E-02                    | 5.7E-03                                       | 0.78                              |
| 69                 | ceramide                          | Cer(d18:1/14:0)                 | 0.48            | 0.25               | 0.93               | 3.59E-02                    | 2.8E-02                                       | 0.86                              |
| 70                 | alkylphosphatidylcholine          | PC(O-18:1/18:2)                 | 0.43            | 0.19               | 0.95               | 3.63E-02                    | 1.5E-09                                       | 0.67                              |
| 71                 | ceramide                          | Cer(d19:1/22:0)                 | 1.96            | 1.02               | 3.77               | 3.79E-02                    | 1.5E-09                                       | 1.39                              |
| 72                 | dihydroceramide                   | Cer(d18:0/22:0)                 | 2.00            | 1.05               | 3.81               | 3.90E-02                    | 1.6E-04                                       | 1.40                              |
| 73                 | alkenylphosphatidylethanolamine   | PE(P-18:0/18:2)                 | 0.50            | 0.27               | 0.95               | 3.93E-02                    | 3.2E-10                                       | 0.57                              |
| 74                 | sphingomyelin                     | SM(38:3) (b)                    | 0.52            | 0.27               | 0.97               | 4.01E-02                    | 3.2E-01                                       | 0.83                              |
| 75                 | diacylglycerol                    | DG(18:1_22:5)                   | 1.63            | 1.02               | 2.60               | 4.03E-02                    | 1.3E-11                                       | 2.02                              |
| 76                 | sphingomyelin                     | SM(d18:2/16:0)                  | 0.20            | 0.04               | 0.94               | 4.04E-02                    | 2.8E-05                                       | 0.91                              |
| 77                 | ceramide                          | Cer(d16:1/20:0)                 | 1.97            | 1.02               | 3.79               | 4.05E-02                    | 1.1E-07                                       | 1.49                              |

|     |                                 |                               |      |      |       |          |         |      |
|-----|---------------------------------|-------------------------------|------|------|-------|----------|---------|------|
| 78  | ceramide                        | Cer(d17:1/24:1)               | 2.45 | 1.03 | 5.81  | 4.06E-02 | 2.4E-03 | 1.16 |
| 79  | phosphatidylcholine             | PC(15:0_20:3)                 | 0.44 | 0.22 | 0.89  | 4.13E-02 | 3.5E-03 | 0.85 |
| 80  | lysophosphatidylcholine         | LPC(18:2) [sn1]               | 0.39 | 0.16 | 0.95  | 4.21E-02 | 3.3E-18 | 0.70 |
| 81  | sphingomyelin                   | SM(d18:2/14:0)                | 0.32 | 0.11 | 0.95  | 4.34E-02 | 3.9E-06 | 0.85 |
| 82  | diacylglycerol                  | DG(18:0_18:1)                 | 1.57 | 1.02 | 2.41  | 4.38E-02 | 1.9E-25 | 2.24 |
| 83  | lysophosphatidylcholine         | LPC(20:2) [sn2]               | 0.37 | 0.14 | 0.98  | 4.47E-02 | 2.9E-08 | 0.81 |
| 84  | lysophosphatidylcholine         | LPC(18:3) [sn2] (a)           | 0.64 | 0.42 | 0.98  | 4.50E-02 | 4.4E-09 | 0.57 |
| 85  | alkylphosphatidylcholine        | PC(O-18:0/18:2)               | 0.44 | 0.20 | 0.99  | 4.58E-02 | 1.2E-10 | 0.63 |
| 86  | ceramide                        | Cer(d19:1/24:0)               | 2.05 | 0.99 | 4.24  | 4.58E-02 | 4.5E-06 | 1.24 |
| 87  | phosphatidylcholine             | PC(18:1_22:6) (a)             | 1.84 | 1.01 | 3.34  | 4.64E-02 | 2.1E-02 | 1.29 |
| 88  | phosphatidylethanolamine        | PE(15-MHDA_20:4)              | 0.57 | 0.32 | 0.98  | 4.71E-02 | 9.9E-01 | 0.82 |
| 89  | cholesterol ester               | CE(22:5) (n3)                 | 2.14 | 1.03 | 4.46  | 4.86E-02 | 1.4E-01 | 0.95 |
| 90  | phosphatidylcholine             | PC(28:0)                      | 0.71 | 0.51 | 1.00  | 4.96E-02 | 8.6E-07 | 0.52 |
| 91  | phosphatidylcholine             | PC(18:0_22:6)                 | 1.99 | 0.99 | 3.98  | 5.18E-02 | 4.1E-02 | 1.34 |
| 92  | phosphatidylcholine             | PC(18:0_22:5) (n3)            | 2.50 | 0.99 | 6.32  | 5.49E-02 | 2.7E-03 | 1.26 |
| 93  | lysophosphatidylcholine         | LPC(18:0) [sn2]               | 0.27 | 0.07 | 1.03  | 5.63E-02 | 2.5E-05 | 0.89 |
| 94  | triacylglycerol                 | TG(16:1_18:1_18:1)            | 1.93 | 0.97 | 3.86  | 5.68E-02 | 6.0E-21 | 1.90 |
| 95  | ceramide                        | Cer(d18:1/20:0)               | 2.21 | 0.99 | 4.93  | 5.80E-02 | 3.7E-12 | 1.43 |
| 96  | alkenylphosphatidylethanolamine | PE(P-19:0/20:4) (a)           | 0.68 | 0.45 | 1.02  | 5.84E-02 | 1.4E-01 | 0.68 |
| 97  | phosphatidylethanolamine        | PE(16:0_22:6)                 | 1.58 | 0.98 | 2.54  | 5.89E-02 | 2.8E-07 | 1.70 |
| 98  | ceramide                        | Cer(d16:1/24:1)               | 2.06 | 0.96 | 4.42  | 6.02E-02 | 2.8E-06 | 1.31 |
| 99  | triacylglycerol                 | TG 56:6_NL 22:5 (a)           | 1.58 | 0.97 | 2.58  | 6.24E-02 | 1.2E-06 | 1.87 |
| 100 | lysophosphatidylcholine         | LPC(19:1) (b)                 | 0.35 | 0.12 | 1.07  | 6.32E-02 | 6.3E-05 | 0.83 |
| 101 | cholesterol ester               | CE(18:1)                      | 3.97 | 0.95 | 16.68 | 6.35E-02 | 5.4E-02 | 1.09 |
| 102 | phosphatidylcholine             | PC(16:0_18:0)                 | 0.18 | 0.03 | 1.10  | 6.37E-02 | 4.9E-07 | 0.91 |
| 103 | alkenylphosphatidylcholine      | PC(P-16:0/18:2)               | 0.40 | 0.15 | 1.04  | 6.44E-02 | 1.1E-13 | 0.66 |
| 104 | alkenylphosphatidylethanolamine | PE(P-18:0/22:5) (n6)          | 0.58 | 0.33 | 1.03  | 6.49E-02 | 6.7E-01 | 0.84 |
| 105 | lysophosphatidylcholine         | LPC(20:2) [sn1]               | 0.41 | 0.15 | 1.07  | 6.69E-02 | 8.5E-07 | 0.81 |
| 106 | triacylglycerol                 | TG(16:0_16:0_18:1)            | 1.54 | 0.97 | 2.43  | 6.70E-02 | 7.3E-15 | 1.88 |
| 107 | diacylglycerol                  | DG(18:1_18:2)                 | 1.55 | 0.97 | 2.47  | 6.77E-02 | 2.3E-12 | 1.87 |
| 108 | lysophosphatidylcholine         | LPC(17:1) [sn2] (a)           | 0.44 | 0.18 | 1.07  | 6.82E-02 | 3.2E-02 | 0.87 |
| 109 | phosphatidylethanolamine        | PE(18:0_22:6)                 | 1.53 | 0.97 | 2.44  | 6.85E-02 | 2.9E-10 | 1.95 |
| 110 | ceramide                        | Cer(d16:1/18:0)               | 1.70 | 0.95 | 3.04  | 6.95E-02 | 5.7E-13 | 1.81 |
| 111 | ceramide                        | Cer(d17:1/20:0)               | 1.66 | 0.95 | 2.92  | 7.08E-02 | 3.0E-05 | 1.42 |
| 112 | dihexosylceramide               | Hex2Cer(d18:1/20:0)           | 1.96 | 0.93 | 4.09  | 7.31E-02 | 7.1E-01 | 0.98 |
| 113 | alkenylphosphatidylcholine      | PC(P-36:2)                    | 0.50 | 0.23 | 1.07  | 7.45E-02 | 2.7E-11 | 0.61 |
| 114 | sphingomyelin                   | SM(35:2) (b)                  | 0.36 | 0.12 | 1.09  | 7.47E-02 | 8.8E-02 | 0.89 |
| 115 | triacylglycerol                 | TG 56:6_NL 22:5 (b)           | 1.55 | 0.95 | 2.51  | 7.48E-02 | 3.7E-06 | 1.85 |
| 116 | phosphatidylcholine             | PC(16:1_22:6)                 | 1.84 | 0.93 | 3.62  | 7.48E-02 | 6.4E-01 | 1.21 |
| 117 | alkenylphosphatidylcholine      | PC(P-35:2)(a)                 | 0.58 | 0.32 | 1.05  | 7.85E-02 | 1.6E-09 | 0.57 |
| 118 | ceramide                        | Cer(d20:1/23:0)               | 1.97 | 0.92 | 4.19  | 7.86E-02 | 6.9E-05 | 1.34 |
| 119 | phosphatidylethanolamine        | PE(16:0_18:1)                 | 1.53 | 0.95 | 2.45  | 7.88E-02 | 4.9E-07 | 1.65 |
| 120 | alkenylphosphatidylethanolamine | PE(P-16:0/22:5) (n3)          | 0.45 | 0.19 | 1.07  | 7.93E-02 | 2.0E-02 | 0.81 |
| 121 | lysophosphatidylcholine         | LPC(20:0) [sn2]               | 0.49 | 0.21 | 1.11  | 8.09E-02 | 1.7E-12 | 0.73 |
| 122 | lysoalkenylphosphatidylcholine  | LPC(P-20:0)                   | 0.54 | 0.26 | 1.09  | 8.12E-02 | 1.6E-01 | 0.86 |
| 123 | alkenylphosphatidylethanolamine | PE(P-18:1/18:1) (a)           | 0.54 | 0.26 | 1.09  | 8.24E-02 | 5.0E-04 | 0.72 |
| 124 | ceramide                        | Cer(d19:1/23:0)               | 1.77 | 0.91 | 3.42  | 8.32E-02 | 5.9E-04 | 1.19 |
| 125 | phosphatidylcholine             | PC(32:2)                      | 0.52 | 0.25 | 1.09  | 8.33E-02 | 1.5E-06 | 0.75 |
| 126 | sphingomyelin                   | SM(37:1)                      | 0.46 | 0.19 | 1.11  | 8.47E-02 | 2.1E-05 | 0.71 |
| 127 | acylcarnitine                   | AC(17:0)                      | 1.66 | 0.96 | 2.89  | 8.74E-02 | 2.7E-07 | 1.25 |
| 128 | phosphatidylcholine             | PC(16:0_18:3) (a)             | 0.43 | 0.16 | 1.14  | 8.98E-02 | 2.4E-06 | 0.83 |
| 129 | phosphatidylserine              | PS(40:5)                      | 1.52 | 0.95 | 2.43  | 9.05E-02 | 4.5E-02 | 1.09 |
| 130 | sphingomyelin                   | SM(d18:1/16:0)                | 0.26 | 0.06 | 1.22  | 9.09E-02 | 6.1E-04 | 0.92 |
| 131 | lysoalkylphosphatidylcholine    | LPC(O-16:0)                   | 0.43 | 0.16 | 1.14  | 9.16E-02 | 3.9E-02 | 0.85 |
| 132 | phosphatidylethanolamine        | PE(18:1_22:6) (a)             | 1.38 | 0.96 | 1.98  | 9.17E-02 | 3.7E-05 | 1.73 |
| 133 | ceramide                        | Cer(d16:1/22:0)               | 1.69 | 0.91 | 3.16  | 9.72E-02 | 3.8E-03 | 1.25 |
| 134 | alkenylphosphatidylcholine      | PC(P-16:0/18:3)               | 0.59 | 0.32 | 1.11  | 9.73E-02 | 1.9E-08 | 0.58 |
| 135 | GM3 ganglioside                 | GM3(d18:1/18:0)               | 2.20 | 0.87 | 5.52  | 9.86E-02 | 5.5E-02 | 0.91 |
| 136 | monohexosylceramide             | HexCer(d16:1/20:0)            | 1.74 | 0.89 | 3.40  | 9.89E-02 | 8.8E-02 | 1.19 |
| 137 | triacylglycerol                 | TG(16:0_18:0_18:1)            | 1.37 | 0.94 | 2.00  | 9.95E-02 | 1.9E-15 | 2.11 |
| 138 | desmosterol                     | DE(18:2)                      | 0.61 | 0.34 | 1.10  | 1.01E-01 | 2.5E-04 | 0.68 |
| 139 | lysophosphatidylcholine         | LPC(18:3) [sn1] (a)/LPC(18:3) | 0.71 | 0.46 | 1.07  | 1.03E-01 | 8.7E-11 | 0.49 |
| 140 | dihexosylceramide               | Hex2Cer(d18:1/24:0)           | 2.08 | 0.87 | 4.96  | 1.04E-01 | 7.6E-02 | 0.90 |
| 141 | diacylglycerol                  | DG(16:1_18:1)                 | 1.40 | 0.93 | 2.12  | 1.06E-01 | 1.8E-21 | 2.45 |
| 142 | alkenylphosphatidylethanolamine | PE(P-18:0/22:4)               | 0.61 | 0.33 | 1.10  | 1.07E-01 | 5.7E-01 | 0.86 |
| 143 | phosphoinositol                 | PI(38:6)                      | 1.69 | 0.90 | 3.19  | 1.08E-01 | 2.4E-02 | 0.97 |
| 144 | lysophosphatidylcholine         | LPC(15:0) [sn1]               | 0.49 | 0.21 | 1.17  | 1.09E-01 | 4.3E-04 | 0.81 |
| 145 | triacylglycerol                 | TG(16:0_18:2_18:2)            | 1.72 | 0.87 | 3.39  | 1.09E-01 | 2.8E-05 | 1.45 |
| 146 | triacylglycerol                 | TG 56:7_NL 22:6               | 1.38 | 0.92 | 2.08  | 1.09E-01 | 5.8E-05 | 1.99 |
| 147 | cholesterol                     | COH                           | 3.58 | 0.75 | 17.10 | 1.10E-01 | 9.3E-01 | 1.00 |
| 148 | alkenylphosphatidylethanolamine | PE(P-16:0/22:5) (n6)          | 0.58 | 0.30 | 1.13  | 1.10E-01 | 7.0E-01 | 0.90 |
| 149 | sphingomyelin                   | SM(d18:2/24:0)                | 0.41 | 0.14 | 1.22  | 1.11E-01 | 2.9E-09 | 0.80 |
| 150 | cholesterol ester               | CE(22:5) (n6)                 | 1.70 | 0.89 | 3.28  | 1.11E-01 | 1.6E-01 | 1.11 |
| 151 | lysophosphatidylcholine         | LPC(20:3) [sn2]               | 0.50 | 0.21 | 1.15  | 1.13E-01 | 8.9E-01 | 0.99 |
| 152 | diacylglycerol                  | DG(18:1_22:6)                 | 1.30 | 0.93 | 1.80  | 1.17E-01 | 3.2E-04 | 2.22 |
| 153 | alkylphosphatidylcholine        | PC(O-16:0/20:4)               | 0.46 | 0.18 | 1.21  | 1.19E-01 | 4.6E-01 | 0.93 |
| 154 | sulfatide                       | Sulfatide (d18:1/24:1(OH))    | 0.62 | 0.33 | 1.13  | 1.19E-01 | 1.2E-06 | 0.75 |
| 155 | triacylglycerol                 | TG(16:0_16:0_18:2)            | 1.61 | 0.88 | 2.93  | 1.23E-01 | 1.9E-04 | 1.35 |
| 156 | lysophosphatidylcholine         | LPC(19:1) (a)                 | 0.50 | 0.21 | 1.20  | 1.25E-01 | 3.0E-02 | 0.86 |
| 157 | acylcarnitine                   | AC(13:0)                      | 1.31 | 0.94 | 1.83  | 1.25E-01 | 2.2E-01 | 1.31 |
| 158 | lysoalkylphosphatidylcholine    | LPC(O-22:1)                   | 0.59 | 0.29 | 1.17  | 1.25E-01 | 8.2E-02 | 0.86 |
| 159 | diacylglycerol                  | DG(16:0_18:1)                 | 1.39 | 0.91 | 2.13  | 1.25E-01 | 1.6E-21 | 2.22 |

|     |                                 |                                 |      |      |      |          |         |      |
|-----|---------------------------------|---------------------------------|------|------|------|----------|---------|------|
| 160 | lysoalkenylphosphatidylcholine  | LPC(P-18:1)                     | 0.53 | 0.23 | 1.21 | 1.27E-01 | 7.5E-05 | 0.77 |
| 161 | triacylglycerol                 | TG 56:7_NL 22:5 (a)             | 1.51 | 0.89 | 2.56 | 1.27E-01 | 9.6E-03 | 1.58 |
| 162 | sphingomyelin                   | SM(38:3) (a)                    | 0.54 | 0.25 | 1.20 | 1.28E-01 | 6.6E-01 | 0.95 |
| 163 | alkylphosphatidylethanolamine   | PE(O-38:6) (b)                  | 0.52 | 0.22 | 1.22 | 1.30E-01 | 1.6E-01 | 0.81 |
| 164 | diacylglycerol                  | DG(18:0_18:2)                   | 1.37 | 0.91 | 2.06 | 1.30E-01 | 1.4E-08 | 1.74 |
| 165 | lysoalkylphosphatidylcholine    | LPC(O-20:1)                     | 0.60 | 0.31 | 1.17 | 1.30E-01 | 2.5E-01 | 0.88 |
| 166 | ceramide                        | Cer(d19:1/20:0)                 | 1.47 | 0.88 | 2.46 | 1.32E-01 | 1.6E-09 | 1.66 |
| 167 | lysophosphatidylcholine         | LPC(15-MHDA) [sn1] / LPC(17:0)  | 0.55 | 0.25 | 1.19 | 1.32E-01 | 1.2E-02 | 0.81 |
| 168 | phosphatidylcholine             | PC(14:0_16:0)                   | 0.62 | 0.33 | 1.16 | 1.33E-01 | 3.5E-05 | 0.78 |
| 169 | phosphatidylserine              | PS(40:6)                        | 1.47 | 0.89 | 2.42 | 1.35E-01 | 3.2E-01 | 1.11 |
| 170 | desmosterol                     | DE(20:4)                        | 0.63 | 0.34 | 1.15 | 1.35E-01 | 1.2E-01 | 1.09 |
| 171 | dihexosylceramide               | Hex2Cer(d18:1/18:0)             | 2.00 | 0.81 | 4.98 | 1.36E-01 | 8.3E-01 | 0.97 |
| 172 | lysophosphatidylcholine         | LPC(17:1) [sn1] (a) / LPC(17:0) | 0.48 | 0.18 | 1.26 | 1.36E-01 | 4.6E-02 | 0.87 |
| 173 | alkenylphosphatidylethanolamine | PE(P-20:0/18:2)                 | 0.60 | 0.31 | 1.18 | 1.37E-01 | 1.1E-10 | 0.63 |
| 174 | alkenylphosphatidylethanolamine | PE(P-18:0/20:4)                 | 0.61 | 0.32 | 1.17 | 1.39E-01 | 6.3E-01 | 0.86 |
| 175 | lysophosphatidylethanolamine    | LPE(17:0)                       | 0.59 | 0.30 | 1.17 | 1.39E-01 | 6.6E-01 | 1.00 |
| 176 | diacylglycerol                  | DG(18:2_18:2)                   | 1.26 | 0.92 | 1.72 | 1.41E-01 | 4.8E-03 | 1.74 |
| 177 | sphingomyelin                   | SM(d17:1/14:0)                  | 0.56 | 0.26 | 1.20 | 1.41E-01 | 4.1E-07 | 0.75 |
| 178 | triacylglycerol                 | TG(17:0_18:1_18:1)              | 1.46 | 0.88 | 2.43 | 1.42E-01 | 1.7E-25 | 2.14 |
| 179 | lysophosphatidylethanolamine    | LPE(18:2)                       | 0.62 | 0.32 | 1.18 | 1.42E-01 | 1.7E-09 | 0.71 |
| 180 | phosphatidylcholine             | PC(18:2_20:5)                   | 0.67 | 0.38 | 1.16 | 1.45E-01 | 1.4E-09 | 0.64 |
| 181 | alkylphosphatidylethanolamine   | PE(O-36:5)                      | 0.74 | 0.49 | 1.12 | 1.47E-01 | 2.1E-03 | 0.61 |
| 182 | alkylphosphatidylethanolamine   | PE(O-18:0/22:6)                 | 0.56 | 0.25 | 1.24 | 1.49E-01 | 1.3E-02 | 0.83 |
| 183 | alkylphosphatidylethanolamine   | PE(O-38:6) (a)                  | 0.62 | 0.33 | 1.16 | 1.51E-01 | 9.5E-03 | 0.82 |
| 184 | sulfatide                       | Sulfatide (d18:1-/16:0(OH))     | 0.54 | 0.24 | 1.25 | 1.52E-01 | 1.7E-07 | 0.75 |
| 185 | alkenylphosphatidylethanolamine | PE(P-16:0/18:1)                 | 0.50 | 0.19 | 1.29 | 1.54E-01 | 2.4E-03 | 0.77 |
| 186 | sphingomyelin                   | SM(d17:1/16:0)                  | 0.44 | 0.14 | 1.35 | 1.57E-01 | 4.9E-05 | 0.83 |
| 187 | lysophosphatidylcholine         | LPC(20:3) [sn1]                 | 0.55 | 0.24 | 1.25 | 1.59E-01 | 2.7E-01 | 0.93 |
| 188 | sphingomyelin                   | SM(41:0)                        | 0.40 | 0.11 | 1.45 | 1.62E-01 | 4.7E-08 | 0.86 |
| 189 | triacylglycerol                 | TG(18:0_18:2_18:2)              | 1.40 | 0.87 | 2.25 | 1.65E-01 | 1.3E-04 | 1.46 |
| 190 | lysoalkylphosphatidylcholine    | LPC(O-24:2)                     | 0.68 | 0.40 | 1.18 | 1.68E-01 | 9.1E-04 | 0.76 |
| 191 | phosphatidylcholine             | PC(15:0_20:4)                   | 0.57 | 0.25 | 1.29 | 1.68E-01 | 9.3E-01 | 1.00 |
| 192 | triacylglycerol                 | TG(18:2_18:2_20:4)              | 0.72 | 0.45 | 1.15 | 1.69E-01 | 4.9E-01 | 1.10 |
| 193 | sphingomyelin                   | SM(d18:2/17:0)                  | 0.46 | 0.16 | 1.38 | 1.70E-01 | 8.2E-02 | 0.90 |
| 194 | alkenylphosphatidylethanolamine | PE(P-18:1/18:1) (b)             | 0.70 | 0.43 | 1.15 | 1.71E-01 | 2.6E-02 | 0.72 |
| 195 | sphingomyelin                   | SM(d18:2/18:1)                  | 0.50 | 0.19 | 1.34 | 1.71E-01 | 4.6E-01 | 0.96 |
| 196 | phosphatidylcholine             | PC(17:0_18:2)                   | 0.48 | 0.17 | 1.36 | 1.72E-01 | 1.6E-04 | 0.80 |
| 197 | triacylglycerol                 | TG(18:1_18:2_18:2)              | 1.34 | 0.87 | 2.06 | 1.77E-01 | 1.6E-04 | 1.53 |
| 198 | phosphatidylcholine             | PC(17:1_18:2)                   | 0.52 | 0.20 | 1.35 | 1.78E-01 | 4.9E-04 | 0.80 |
| 199 | monohexosylceramide             | HexCer(d16:1/24:0)              | 1.60 | 0.79 | 3.23 | 1.82E-01 | 9.4E-02 | 0.91 |
| 200 | alkenylphosphatidylethanolamine | PE(P-20:1/20:4)                 | 0.74 | 0.47 | 1.17 | 1.82E-01 | 1.3E-01 | 0.72 |
| 201 | cholesterol ester               | CE(15:0)                        | 0.63 | 0.33 | 1.24 | 1.83E-01 | 4.7E-03 | 0.81 |
| 202 | phosphatidylcholine             | PC(33:2)                        | 0.56 | 0.25 | 1.30 | 1.85E-01 | 1.1E-07 | 0.75 |
| 203 | sulfatide                       | Sulfatide (d18:1-/24:1)         | 1.56 | 0.80 | 3.04 | 1.85E-01 | 5.4E-01 | 1.04 |
| 204 | lysoalkenylphosphatidylcholine  | LPC(P-17:0) (a)                 | 0.65 | 0.34 | 1.23 | 1.86E-01 | 2.2E-03 | 0.73 |
| 205 | desmosterol                     | DE(16:0)                        | 0.66 | 0.36 | 1.22 | 1.87E-01 | 5.8E-03 | 1.32 |
| 206 | alkylphosphatidylcholine        | PC(O-34:2) (a)                  | 0.81 | 0.62 | 1.07 | 1.87E-01 | 1.4E-02 | 0.69 |
| 207 | lysophosphatidylcholine         | LPC(20:4) [sn2]                 | 0.55 | 0.22 | 1.35 | 1.87E-01 | 1.5E-01 | 1.07 |
| 208 | lysophosphatidylcholine         | LPC(22:4) [sn1]                 | 0.66 | 0.36 | 1.22 | 1.88E-01 | 3.5E-01 | 0.98 |
| 209 | alkenylphosphatidylethanolamine | PE(P-18:1/18:2) (b)             | 0.76 | 0.52 | 1.13 | 1.89E-01 | 5.6E-05 | 0.54 |
| 210 | phosphatidylcholine             | PC(17:0_22:6)                   | 1.49 | 0.82 | 2.70 | 1.90E-01 | 9.9E-01 | 1.14 |
| 211 | alkenylphosphatidylethanolamine | PE(P-18:1/22:5) (a)             | 0.57 | 0.24 | 1.34 | 1.92E-01 | 4.6E-03 | 0.82 |
| 212 | alkenylphosphatidylcholine      | PC(P-36:3)                      | 0.46 | 0.14 | 1.49 | 1.96E-01 | 4.1E-01 | 0.95 |
| 213 | triacylglycerol                 | TG(16:0_17:0_18:2)              | 1.38 | 0.84 | 2.26 | 1.97E-01 | 1.9E-16 | 1.77 |
| 214 | lysophosphatidylcholine         | LPC(15-MHDA) [sn2]              | 0.66 | 0.35 | 1.22 | 1.98E-01 | 1.6E-02 | 0.79 |
| 215 | phosphatidylcholine             | PC(38:5) (b)                    | 1.59 | 0.81 | 3.12 | 1.99E-01 | 1.4E-01 | 1.21 |
| 216 | lysophosphatidylcholine         | LPC(22:6) [sn2]                 | 1.54 | 0.79 | 3.02 | 2.01E-01 | 5.3E-01 | 1.11 |
| 217 | diacylglycerol                  | DG(18:1_20:5)                   | 1.17 | 0.92 | 1.49 | 2.02E-01 | 1.8E-01 | 1.36 |
| 218 | lysophosphatidylcholine         | LPC(22:6) [sn1]                 | 1.49 | 0.80 | 2.79 | 2.04E-01 | 2.5E-01 | 1.05 |
| 219 | GM3 ganglioside                 | GM3(d18:1/24:0)                 | 1.63 | 0.77 | 3.46 | 2.04E-01 | 3.9E-02 | 0.87 |
| 220 | alkenylphosphatidylethanolamine | PE(P-18:1/20:3)                 | 0.68 | 0.37 | 1.23 | 2.05E-01 | 1.2E-01 | 0.75 |
| 221 | phosphatidylcholine             | PC(15-MHDA_22:6)                | 1.53 | 0.78 | 3.01 | 2.05E-01 | 7.9E-01 | 1.06 |
| 222 | ubiquinone                      | Ubiquinone                      | 1.57 | 0.79 | 3.13 | 2.07E-01 | 3.7E-01 | 0.97 |
| 223 | phosphatidylethanolamine        | PE(16:0_16:1)                   | 1.24 | 0.89 | 1.74 | 2.07E-01 | 4.2E-05 | 1.69 |
| 224 | alkylphosphatidylethanolamine   | PE(O-18:1/22:6)                 | 0.69 | 0.38 | 1.24 | 2.08E-01 | 7.3E-03 | 0.84 |
| 225 | lysophosphatidylcholine         | LPC(22:4) [sn2]                 | 0.67 | 0.36 | 1.24 | 2.10E-01 | 2.5E-01 | 1.03 |
| 226 | lysoalkylphosphatidylcholine    | LPC(O-24:0)                     | 1.83 | 0.71 | 4.71 | 2.13E-01 | 8.5E-01 | 1.00 |
| 227 | phosphatidylglycerol            | PG(36:1)                        | 1.32 | 0.85 | 2.06 | 2.14E-01 | 4.0E-10 | 1.90 |
| 228 | alkenylphosphatidylethanolamine | PE(P-18:0/18:3)                 | 0.75 | 0.48 | 1.18 | 2.14E-01 | 2.6E-06 | 0.53 |
| 229 | alkenylphosphatidylethanolamine | PE(P-18:1/22:5) (b)             | 0.76 | 0.51 | 1.15 | 2.17E-01 | 2.3E-02 | 0.70 |
| 230 | dihexosylceramide               | Hex2Cer(d18:2/24:1)             | 0.67 | 0.36 | 1.25 | 2.18E-01 | 8.9E-05 | 0.75 |
| 231 | phosphatidylserine              | PS(38:3)                        | 1.27 | 0.87 | 1.85 | 2.21E-01 | 8.5E-01 | 0.95 |
| 232 | triacylglycerol                 | TG 54:6_NL 22:6                 | 1.23 | 0.88 | 1.71 | 2.23E-01 | 2.0E-03 | 1.95 |
| 233 | alkenylphosphatidylethanolamine | PE(P-18:0/22:5) (n3)            | 0.61 | 0.28 | 1.33 | 2.23E-01 | 7.4E-02 | 0.79 |
| 234 | oxidised cholesterol ester      | oxCE (18:2) [+O]                | 0.66 | 0.33 | 1.29 | 2.23E-01 | 2.8E-04 | 0.76 |
| 235 | triacylglycerol                 | TG(16:1_17:0_18:1)              | 1.44 | 0.79 | 2.60 | 2.24E-01 | 5.1E-16 | 1.68 |
| 236 | phosphoinositol                 | PI(34:0)                        | 1.35 | 0.83 | 2.17 | 2.25E-01 | 9.8E-03 | 0.82 |
| 237 | sphingomyelin                   | SM(d18:1/14:0)/SM(d16:1/16:0)   | 0.45 | 0.12 | 1.64 | 2.30E-01 | 7.2E-06 | 0.89 |
| 238 | alkenylphosphatidylcholine      | PC(P-18:0/20:4)                 | 0.64 | 0.31 | 1.34 | 2.37E-01 | 6.4E-01 | 0.91 |
| 239 | alkenylphosphatidylcholine      | PC(P-16:0/20:4)                 | 0.60 | 0.25 | 1.41 | 2.40E-01 | 3.8E-01 | 0.96 |
| 240 | alkenylphosphatidylethanolamine | PE(P-16:0/20:4)                 | 0.66 | 0.33 | 1.33 | 2.45E-01 | 8.8E-01 | 0.88 |
| 241 | phosphatidylserine              | PS(38:5)                        | 1.22 | 0.86 | 1.74 | 2.47E-01 | 3.2E-01 | 0.92 |

|     |                                 |                     |      |      |      |          |         |      |
|-----|---------------------------------|---------------------|------|------|------|----------|---------|------|
| 242 | diacylglycerol                  | DG(16:0_18:2)       | 1.29 | 0.84 | 1.97 | 2.49E-01 | 2.5E-07 | 1.77 |
| 243 | alkenylphosphatidylcholine      | PC(P-16:0/22:6)     | 1.76 | 0.66 | 4.66 | 2.49E-01 | 1.5E-02 | 0.90 |
| 244 | alkenylphosphatidylethanolamine | PE(P-19:0/20:4) (b) | 0.74 | 0.44 | 1.24 | 2.50E-01 | 1.3E-01 | 0.76 |
| 245 | acylcarnitine                   | AC(15:0)            | 1.40 | 0.79 | 2.45 | 2.50E-01 | 2.3E-02 | 1.16 |
| 246 | phosphatidylcholine             | PC(34:5)            | 0.78 | 0.52 | 1.19 | 2.51E-01 | 2.2E-04 | 0.75 |
| 247 | monohexosylceramide             | HexCer(d16:1/18:0)  | 1.36 | 0.79 | 2.34 | 2.52E-01 | 6.6E-06 | 1.36 |
| 248 | triacylglycerol                 | TG(16:1_18:1_18:2)  | 1.58 | 0.71 | 3.55 | 2.53E-01 | 9.0E-17 | 1.57 |
| 249 | lysophosphatidylcholine         | LPC(16:0) [sn2]     | 0.44 | 0.11 | 1.80 | 2.57E-01 | 1.7E-02 | 0.97 |
| 250 | alkylphosphatidylcholine        | PC(O-18:1/18:1)     | 0.61 | 0.26 | 1.45 | 2.57E-01 | 6.3E-03 | 0.82 |
| 251 | ceramide                        | Cer(d19:1/16:0)     | 1.31 | 0.81 | 2.13 | 2.60E-01 | 1.8E-08 | 1.36 |
| 252 | phosphatidylcholine             | PC(15:0_22:6)       | 1.44 | 0.76 | 2.75 | 2.61E-01 | 8.0E-02 | 1.02 |
| 253 | alkenylphosphatidylethanolamine | PE(P-17:0/20:4) (b) | 0.75 | 0.46 | 1.24 | 2.63E-01 | 6.5E-01 | 0.82 |
| 254 | lysophosphatidylcholine         | LPC(20:4) [sn1]     | 0.64 | 0.29 | 1.40 | 2.64E-01 | 3.2E-01 | 1.03 |
| 255 | ceramide                        | Cer(d18:2/24:1)     | 1.65 | 0.68 | 4.01 | 2.65E-01 | 6.5E-04 | 1.22 |
| 256 | monoalkyl diacylglycerol        | TG(O-52:2)          | 0.73 | 0.42 | 1.29 | 2.66E-01 | 6.7E-01 | 0.97 |
| 257 | ceramide                        | Cer(d18:1/26:0)     | 0.58 | 0.22 | 1.50 | 2.66E-01 | 4.0E-02 | 0.91 |
| 258 | ceramide                        | Cer(d18:1/22:0)     | 1.73 | 0.66 | 4.57 | 2.66E-01 | 2.3E-03 | 1.18 |
| 259 | lysophosphatidylcholine         | LPC(18:1) [sn2]     | 0.54 | 0.18 | 1.62 | 2.67E-01 | 2.9E-02 | 0.92 |
| 260 | alkenylphosphatidylcholine      | PC(P-17:0/20:4) (b) | 0.79 | 0.53 | 1.17 | 2.67E-01 | 3.3E-01 | 0.79 |
| 261 | alkylphosphatidylcholine        | PC(O-18:0/20:4)     | 0.64 | 0.29 | 1.40 | 2.68E-01 | 1.3E-01 | 0.94 |
| 262 | cholesterol ester               | CE(24:4)            | 0.73 | 0.42 | 1.27 | 2.69E-01 | 7.0E-01 | 0.91 |
| 263 | lysophosphatidylinositol        | LPI(18:1)           | 0.74 | 0.43 | 1.27 | 2.69E-01 | 4.2E-02 | 0.83 |
| 264 | triacylglycerol                 | TG(16:0_16:1_18:1)  | 1.46 | 0.74 | 2.89 | 2.70E-01 | 1.9E-18 | 1.63 |
| 265 | triacylglycerol                 | TG 52:5_NL 20:5     | 1.24 | 0.85 | 1.82 | 2.72E-01 | 9.5E-02 | 1.53 |
| 266 | alkylphosphatidylcholine        | PC(O-40:7) (a)      | 1.47 | 0.73 | 2.96 | 2.78E-01 | 4.1E-01 | 1.02 |
| 267 | acylcarnitine                   | AC(18:2)            | 1.39 | 0.77 | 2.51 | 2.78E-01 | 9.1E-02 | 1.16 |
| 268 | lysoalkenylphosphatidylcholine  | LPC(P-16:0)         | 0.57 | 0.21 | 1.57 | 2.84E-01 | 1.0E-04 | 0.82 |
| 269 | alkenylphosphatidylethanolamine | PE(P-16:0/18:3)     | 0.77 | 0.47 | 1.25 | 2.85E-01 | 6.9E-06 | 0.56 |
| 270 | lysophosphatidylcholine         | LPC(17:1) [sn1] (b) | 0.48 | 0.12 | 1.85 | 2.85E-01 | 5.3E-03 | 0.89 |
| 271 | diacylglycerol                  | DG(16:0_22:6)       | 1.20 | 0.86 | 1.67 | 2.86E-01 | 2.6E-03 | 2.07 |
| 272 | phosphatidylcholine             | PC(40:7) (a)        | 0.64 | 0.30 | 1.40 | 2.86E-01 | 2.9E-01 | 1.06 |
| 273 | triacylglycerol                 | TG(18:1_18:1_22:6)  | 1.25 | 0.83 | 1.87 | 2.87E-01 | 7.9E-03 | 1.56 |
| 274 | lysoalkylphosphatidylcholine    | LPC(O-18:0)         | 0.63 | 0.27 | 1.48 | 2.87E-01 | 7.1E-02 | 0.84 |
| 275 | lysophosphatidylcholine         | LPC(22:0) [sn1]     | 0.64 | 0.27 | 1.49 | 2.88E-01 | 1.3E-09 | 0.77 |
| 276 | sphingomyelin                   | SM(d19:1/24:1)      | 1.54 | 0.69 | 3.44 | 2.88E-01 | 4.9E-03 | 1.15 |
| 277 | phosphoinositol                 | PI(18:0_20:3) (a)   | 1.47 | 0.72 | 2.99 | 2.89E-01 | 1.7E-01 | 1.16 |
| 278 | phosphatidylcholine             | PC(18:1_20:3)       | 1.36 | 0.75 | 2.48 | 2.92E-01 | 2.6E-02 | 1.27 |
| 279 | phosphoinositol                 | PI(39:6) (b)        | 1.33 | 0.78 | 2.29 | 2.93E-01 | 1.0E-01 | 0.95 |
| 280 | cholesterol ester               | CE(18:3)            | 0.72 | 0.39 | 1.33 | 2.93E-01 | 6.4E-12 | 0.65 |
| 281 | diacylglycerol                  | DG(16:0_22:5)       | 1.27 | 0.81 | 1.99 | 2.96E-01 | 4.8E-06 | 1.89 |
| 282 | phosphatidylcholine             | PC(16:0_18:3) (b)   | 0.67 | 0.31 | 1.42 | 2.97E-01 | 1.4E-02 | 0.90 |
| 283 | phosphoinositol                 | PI(17:0_20:4) (a+b) | 0.62 | 0.25 | 1.53 | 2.98E-01 | 2.2E-01 | 0.96 |
| 284 | phosphatidylcholine             | PC(31:0) (a)        | 0.78 | 0.49 | 1.24 | 2.99E-01 | 7.2E-04 | 0.72 |
| 285 | ceramide                        | Cer(d18:1/23:0)     | 1.83 | 0.58 | 5.81 | 3.00E-01 | 8.0E-01 | 1.03 |
| 286 | phosphatidylcholine             | PC(16:0_20:5)       | 1.33 | 0.78 | 2.28 | 3.05E-01 | 7.6E-01 | 1.14 |
| 287 | diacylglycerol                  | DG(16:0_16:0)       | 1.16 | 0.87 | 1.56 | 3.06E-01 | 1.9E-09 | 2.22 |
| 288 | lysophosphatidylcholine         | LPC(17:0) [sn1]     | 0.62 | 0.25 | 1.54 | 3.09E-01 | 1.5E-02 | 0.85 |
| 289 | phosphatidylcholine             | PC(38:2)            | 0.52 | 0.14 | 1.87 | 3.12E-01 | 3.3E-01 | 1.01 |
| 290 | phosphatidylcholine             | PC(16:1_18:2)       | 1.48 | 0.69 | 3.17 | 3.12E-01 | 6.7E-01 | 1.06 |
| 291 | phosphatidylcholine             | PC(38:7)(c)         | 1.49 | 0.69 | 3.20 | 3.12E-01 | 5.1E-01 | 1.10 |
| 292 | phosphatidylcholine             | PC(39:5)            | 1.60 | 0.63 | 4.05 | 3.18E-01 | 8.6E-01 | 1.04 |
| 293 | cholesterol ester               | CE(24:1)            | 0.71 | 0.36 | 1.40 | 3.22E-01 | 2.9E-03 | 0.80 |
| 294 | phosphatidylethanolamine        | PE(18:0_22:5) (n6)  | 1.21 | 0.83 | 1.76 | 3.22E-01 | 9.1E-09 | 2.00 |
| 295 | triacylglycerol                 | TG 54:6_NL 20:5     | 1.26 | 0.80 | 1.96 | 3.24E-01 | 3.9E-02 | 1.52 |
| 296 | diacylglycerol                  | DG(17:1_18:2)       | 1.25 | 0.80 | 1.94 | 3.25E-01 | 3.2E-06 | 1.65 |
| 297 | triacylglycerol                 | TG(18:0_18:0_18:1)  | 1.15 | 0.87 | 1.52 | 3.25E-01 | 1.9E-07 | 1.97 |
| 298 | triacylglycerol                 | TG(15:0_18:1_18:1)  | 1.34 | 0.74 | 2.41 | 3.30E-01 | 1.3E-10 | 1.58 |
| 299 | ceramide                        | Cer(d17:1/24:0)     | 1.44 | 0.69 | 2.99 | 3.31E-01 | 9.3E-01 | 0.99 |
| 300 | triacylglycerol                 | TG 56:8_NL 22:6     | 1.18 | 0.85 | 1.64 | 3.33E-01 | 3.8E-02 | 1.83 |
| 301 | triacylglycerol                 | TG(18:2_18:2_18:2)  | 1.11 | 0.90 | 1.38 | 3.33E-01 | 6.3E-02 | 1.75 |
| 302 | alkenylphosphatidylethanolamine | PE(P-18:0/18:1)     | 0.67 | 0.30 | 1.51 | 3.34E-01 | 8.7E-03 | 0.77 |
| 303 | phosphatidylcholine             | PC(32:1)            | 1.35 | 0.74 | 2.47 | 3.34E-01 | 2.0E-03 | 1.23 |
| 304 | cholesterol ester               | CE(16:0)            | 1.84 | 0.53 | 6.33 | 3.36E-01 | 6.9E-01 | 1.00 |
| 305 | diacylglycerol                  | DG(17:1_18:1)       | 1.26 | 0.78 | 2.03 | 3.39E-01 | 1.4E-18 | 1.98 |
| 306 | lysoalkenylphosphatidylcholine  | LPC(P-17:0) (b)     | 0.74 | 0.41 | 1.36 | 3.45E-01 | 5.6E-03 | 0.76 |
| 307 | triacylglycerol                 | TG(16:1_16:1_18:1)  | 1.27 | 0.77 | 2.09 | 3.45E-01 | 1.1E-16 | 2.00 |
| 308 | sphingomyelin                   | SM(43:2) (b)        | 0.63 | 0.25 | 1.62 | 3.46E-01 | 1.0E-02 | 0.90 |
| 309 | diacylglycerol                  | DG(18:0_20:4)       | 1.28 | 0.77 | 2.12 | 3.48E-01 | 5.2E-14 | 1.84 |
| 310 | lysoalkylphosphatidylcholine    | LPC(O-18:1)         | 0.67 | 0.29 | 1.56 | 3.49E-01 | 1.5E-01 | 0.90 |
| 311 | diacylglycerol                  | DG(17:0_18:1)       | 1.25 | 0.78 | 1.98 | 3.50E-01 | 3.1E-14 | 1.75 |
| 312 | alkylphosphatidylcholine        | PC(O-34:4)          | 0.69 | 0.32 | 1.51 | 3.51E-01 | 1.3E-01 | 0.88 |
| 313 | lysophosphatidylcholine         | LPC(22:0) [sn2]     | 0.68 | 0.30 | 1.54 | 3.51E-01 | 7.4E-08 | 0.79 |
| 314 | phosphatidylcholine             | PC(31:0) (b)        | 0.67 | 0.29 | 1.56 | 3.52E-01 | 2.0E-02 | 0.86 |
| 315 | alkenylphosphatidylethanolamine | PE(P-15:0/22:6) (b) | 0.83 | 0.59 | 1.18 | 3.53E-01 | 1.0E-01 | 0.98 |
| 316 | phosphatidylethanolamine        | PE(18:0_18:1)       | 1.24 | 0.79 | 1.93 | 3.55E-01 | 9.7E-04 | 1.37 |
| 317 | phosphatidylcholine             | PC(40:8)            | 0.64 | 0.25 | 1.64 | 3.56E-01 | 6.6E-06 | 0.86 |
| 318 | alkylphosphatidylethanolamine   | PE(O-18:1/18:2)     | 0.81 | 0.53 | 1.25 | 3.56E-01 | 1.0E-02 | 0.72 |
| 319 | cholesterol ester               | CE(20:0)            | 0.78 | 0.46 | 1.32 | 3.56E-01 | 1.1E-02 | 0.79 |
| 320 | sphingomyelin                   | SM(d18:0/22:0)      | 1.36 | 0.71 | 2.60 | 3.58E-01 | 2.8E-02 | 1.27 |
| 321 | ceramide                        | Cer(d20:1/26:0)     | 1.06 | 0.94 | 1.19 | 3.60E-01 | 8.8E-01 | 1.29 |
| 322 | alkenylphosphatidylethanolamine | PE(P-18:1/20:4) (b) | 0.82 | 0.53 | 1.27 | 3.68E-01 | 4.3E-01 | 0.84 |
| 323 | ceramide                        | Cer(d18:1/19:0)     | 1.27 | 0.75 | 2.14 | 3.71E-01 | 1.6E-04 | 1.41 |

|     |                                     |                                |      |      |      |          |         |      |
|-----|-------------------------------------|--------------------------------|------|------|------|----------|---------|------|
| 324 | ceramide                            | Cer(d18:1/16:0)                | 1.84 | 0.48 | 7.08 | 3.76E-01 | 1.9E-03 | 1.12 |
| 325 | lysophosphatidylcholine             | LPC(19:0) [sn2] (a)            | 0.72 | 0.34 | 1.51 | 3.81E-01 | 2.8E-04 | 0.79 |
| 326 | phosphoinositol                     | PI(18:1/18:2)                  | 0.81 | 0.50 | 1.31 | 3.83E-01 | 5.6E-08 | 0.65 |
| 327 | alkenylphosphatidylethanolamine     | PE(P-20:0/22:6)                | 1.34 | 0.69 | 2.60 | 3.90E-01 | 1.7E-02 | 0.90 |
| 328 | ceramide                            | Cer(d16:1/24:0)                | 1.33 | 0.69 | 2.53 | 3.92E-01 | 6.1E-01 | 1.05 |
| 329 | GM3 ganglioside                     | GM3(d18:1/20:0)                | 1.38 | 0.65 | 2.92 | 3.94E-01 | 6.1E-02 | 1.18 |
| 330 | cholesterol ester                   | CE(20:1)                       | 0.71 | 0.32 | 1.56 | 3.97E-01 | 1.7E-02 | 0.89 |
| 331 | triacylglycerol                     | TG(14:0_16:1_18:2)             | 0.87 | 0.63 | 1.20 | 3.98E-01 | 3.2E-01 | 1.16 |
| 332 | sphingomyelin                       | SM(d16:1/23:0)/SM(d17:1/2)     | 0.64 | 0.23 | 1.80 | 3.99E-01 | 1.1E-06 | 0.85 |
| 333 | alkylphosphatidylcholine            | PC(O-18:0/22:6)                | 1.44 | 0.61 | 3.41 | 4.00E-01 | 5.0E-01 | 0.95 |
| 334 | alkylphosphatidylcholine            | PC(O-32:2)                     | 0.82 | 0.51 | 1.31 | 4.02E-01 | 1.0E-12 | 0.52 |
| 335 | sphingomyelin                       | SM(43:1)                       | 0.64 | 0.22 | 1.81 | 4.03E-01 | 1.3E-02 | 0.91 |
| 336 | phosphatidylserine                  | PS(36:1)                       | 1.20 | 0.80 | 1.79 | 4.06E-01 | 2.5E-02 | 1.17 |
| 337 | alkenylphosphatidylethanolamine     | PE(P-16:0/20:3)                | 0.78 | 0.43 | 1.41 | 4.11E-01 | 1.3E-01 | 0.79 |
| 338 | cholesterol ester                   | CE(24:0)                       | 0.80 | 0.48 | 1.35 | 4.13E-01 | 1.4E-02 | 0.79 |
| 339 | sphingomyelin                       | SM(d18:2/20:0)                 | 0.62 | 0.20 | 1.96 | 4.17E-01 | 7.4E-01 | 1.00 |
| 340 | sphingomyelin                       | SM(d17:1/24:1)                 | 0.63 | 0.20 | 1.95 | 4.18E-01 | 8.7E-03 | 0.91 |
| 341 | sphingomyelin                       | SM(d18:1/24:0)                 | 0.65 | 0.23 | 1.86 | 4.19E-01 | 1.1E-03 | 0.89 |
| 342 | lysophosphatidylcholine             | LPC(20:0) [sn1]                | 0.71 | 0.30 | 1.65 | 4.19E-01 | 2.0E-09 | 0.79 |
| 343 | phosphatidylcholine                 | PC(18:1_18:1)                  | 0.57 | 0.15 | 2.21 | 4.19E-01 | 9.4E-06 | 0.87 |
| 344 | GM3 ganglioside                     | GM3(d18:1/24:1)                | 1.38 | 0.63 | 3.05 | 4.19E-01 | 7.3E-01 | 0.99 |
| 345 | sulfatide                           | Sulfatide (d18:1/24:0)         | 1.22 | 0.75 | 2.00 | 4.19E-01 | 6.0E-01 | 1.06 |
| 346 | dihexosylceramide                   | Hex2Cer(d18:1/22:0)            | 1.36 | 0.64 | 2.89 | 4.21E-01 | 7.2E-03 | 0.82 |
| 347 | diacylglycerol                      | DG(18:2_20:4)                  | 1.08 | 0.89 | 1.32 | 4.21E-01 | 1.7E-01 | 1.37 |
| 348 | lysoalkylphosphatidylcholine        | LPC(O-20:0)                    | 0.71 | 0.31 | 1.63 | 4.22E-01 | 2.6E-01 | 0.87 |
| 349 | cholesterol ester                   | CE(16:2)                       | 0.78 | 0.42 | 1.44 | 4.25E-01 | 2.4E-06 | 0.73 |
| 350 | alkenylphosphatidylethanolamine     | PE(P-18:0/20:3)                | 0.78 | 0.43 | 1.43 | 4.26E-01 | 7.3E-02 | 0.76 |
| 351 | cholesterol ester                   | CE(22:0)                       | 0.81 | 0.49 | 1.35 | 4.27E-01 | 1.2E-02 | 0.78 |
| 352 | phosphatidylethanolamine            | PE(17:0_18:2)                  | 0.82 | 0.51 | 1.33 | 4.27E-01 | 4.1E-01 | 1.00 |
| 353 | phosphatidylethanolamine            | PE(36:0)                       | 1.04 | 0.95 | 1.13 | 4.28E-01 | 7.2E-01 | 0.82 |
| 354 | phosphatidylcholine                 | PC(38:6) (a)                   | 0.63 | 0.19 | 2.02 | 4.28E-01 | 5.7E-03 | 0.93 |
| 355 | lysophosphatidylcholine             | LPC(22:5) [sn1] (n3)/LPC(22:5) | 1.37 | 0.63 | 2.98 | 4.29E-01 | 2.5E-01 | 0.95 |
| 356 | diacylglycerol                      | DG(15:0_18:2)                  | 0.84 | 0.54 | 1.30 | 4.30E-01 | 3.3E-01 | 1.15 |
| 357 | phosphatidylethanolamine            | PE(18:0_22:5) (n3)             | 1.20 | 0.76 | 1.91 | 4.31E-01 | 1.3E-06 | 1.58 |
| 358 | phosphatidylcholine                 | PC(36:6) (a)                   | 1.19 | 0.77 | 1.83 | 4.33E-01 | 6.3E-01 | 1.14 |
| 359 | ceramide                            | Cer(d18:2/20:0)                | 1.34 | 0.65 | 2.77 | 4.35E-01 | 8.5E-04 | 1.30 |
| 360 | phosphatidylethanolamine            | PE(17:0_22:6)                  | 1.20 | 0.75 | 1.92 | 4.36E-01 | 3.1E-03 | 1.50 |
| 361 | alkylphosphatidylcholine            | PC(O-38:5)                     | 0.68 | 0.26 | 1.81 | 4.36E-01 | 3.8E-01 | 1.00 |
| 362 | triacylglycerol                     | TG 54:7_NL 22:6                | 1.14 | 0.82 | 1.58 | 4.38E-01 | 2.4E-03 | 1.98 |
| 363 | sphingomyelin                       | SM(d18:1/18:0)/SM(d16:1/20:0)  | 1.63 | 0.47 | 5.69 | 4.43E-01 | 1.7E-03 | 1.16 |
| 364 | phosphatidylglycerol                | PG(34:1)                       | 1.23 | 0.72 | 2.08 | 4.46E-01 | 2.9E-07 | 1.56 |
| 365 | triacylglycerol                     | TG(16:0_16:0_16:0)             | 1.12 | 0.84 | 1.49 | 4.46E-01 | 3.5E-04 | 1.60 |
| 366 | alkenylphosphatidylethanolamine     | PE(P-17:0/20:4) (a)            | 0.84 | 0.52 | 1.33 | 4.51E-01 | 7.2E-01 | 0.80 |
| 367 | cholesterol ester                   | CE(17:0)                       | 1.44 | 0.55 | 3.76 | 4.55E-01 | 1.0E-01 | 0.88 |
| 368 | triacylglycerol                     | TG(14:0_18:2_18:2)             | 0.87 | 0.61 | 1.25 | 4.55E-01 | 7.9E-01 | 1.11 |
| 369 | cholesterol ester                   | CE(22:4)                       | 0.74 | 0.34 | 1.62 | 4.57E-01 | 7.5E-02 | 1.04 |
| 370 | monoalkyldiacylglycerol             | TG(O-50:1)                     | 0.83 | 0.50 | 1.37 | 4.58E-01 | 7.6E-01 | 0.89 |
| 371 | alkylphosphatidylcholine            | PC(O-40:5)                     | 0.66 | 0.21 | 2.03 | 4.58E-01 | 5.0E-01 | 0.98 |
| 372 | monohexosylceramide                 | HexCer(d16:1/22:0)             | 1.30 | 0.64 | 2.65 | 4.63E-01 | 2.9E-01 | 0.98 |
| 373 | triacylglycerol                     | TG(16:0_17:0_18:1)             | 1.16 | 0.78 | 1.72 | 4.64E-01 | 1.3E-13 | 1.85 |
| 374 | dihexosylceramide                   | Hex2Cer(d18:2/16:0)            | 0.72 | 0.30 | 1.73 | 4.68E-01 | 2.2E-02 | 0.89 |
| 375 | dihexosylceramide                   | Hex2Cer(d16:1/16:0)            | 1.32 | 0.62 | 2.81 | 4.71E-01 | 9.7E-01 | 1.01 |
| 376 | lysoalkenylphosphatidylethanolamine | LPE(P-20:0)                    | 0.73 | 0.31 | 1.72 | 4.71E-01 | 5.6E-02 | 0.87 |
| 377 | lysophosphatidylethanolamine        | LPE(18:1)                      | 0.79 | 0.42 | 1.51 | 4.78E-01 | 4.6E-01 | 0.92 |
| 378 | alkenylphosphatidylethanolamine     | PE(P-20:0/18:1)                | 1.31 | 0.62 | 2.76 | 4.78E-01 | 1.6E-01 | 0.88 |
| 379 | phosphatidylcholine                 | PC(18:1_18:2)                  | 0.80 | 0.45 | 1.44 | 4.80E-01 | 2.7E-03 | 0.84 |
| 380 | alkenylphosphatidylcholine          | PC(P-17:0/20:4) (a)            | 0.79 | 0.41 | 1.51 | 4.80E-01 | 8.3E-01 | 0.85 |
| 381 | diacylglycerol                      | DG(14:0_18:2)                  | 0.88 | 0.61 | 1.27 | 4.82E-01 | 3.2E-01 | 1.15 |
| 382 | diacylglycerol                      | DG(16:0_18:0)                  | 1.05 | 0.91 | 1.21 | 4.85E-01 | 5.0E-06 | 3.94 |
| 383 | alkenylphosphatidylethanolamine     | PE(P-20:0/20:4)                | 0.77 | 0.37 | 1.62 | 4.90E-01 | 6.5E-01 | 0.96 |
| 384 | ceramide                            | Cer(d18:1/24:0)                | 1.41 | 0.53 | 3.77 | 4.95E-01 | 2.2E-01 | 1.07 |
| 385 | cholesterol ester                   | CE(20:3)                       | 1.36 | 0.56 | 3.29 | 4.96E-01 | 2.8E-05 | 1.19 |
| 386 | alkylphosphatidylcholine            | PC(O-32:1)                     | 0.71 | 0.26 | 1.95 | 5.00E-01 | 1.5E-01 | 0.89 |
| 387 | phosphatidylcholine                 | PC(36:0)                       | 1.17 | 0.72 | 1.90 | 5.01E-01 | 5.5E-02 | 1.33 |
| 388 | phosphoinositol                     | PI(16:0_16:1)                  | 1.13 | 0.79 | 1.62 | 5.03E-01 | 3.3E-01 | 1.18 |
| 389 | cholesterol ester                   | CE(20:5)                       | 1.18 | 0.72 | 1.95 | 5.08E-01 | 1.2E-02 | 0.93 |
| 390 | cholesterol ester                   | CE(22:1)                       | 0.83 | 0.47 | 1.46 | 5.10E-01 | 2.4E-03 | 0.85 |
| 391 | lysoalkenylphosphatidylcholine      | LPC(P-18:0)                    | 0.77 | 0.35 | 1.69 | 5.11E-01 | 2.2E-04 | 0.78 |
| 392 | alkylphosphatidylcholine            | PC(O-34:1)                     | 0.67 | 0.20 | 2.22 | 5.14E-01 | 5.0E-02 | 0.90 |
| 393 | monohexosylceramide                 | HexCer(d18:1/20:0)             | 0.77 | 0.35 | 1.68 | 5.15E-01 | 8.5E-02 | 0.96 |
| 394 | ceramide                            | Cer(d18:1/21:0)                | 1.31 | 0.58 | 2.99 | 5.19E-01 | 4.3E-03 | 1.25 |
| 395 | phosphoinositol                     | PI(38:5) (a)                   | 1.33 | 0.56 | 3.17 | 5.21E-01 | 1.0E-01 | 0.97 |
| 396 | sphingomyelin                       | SM(36:2) (a)                   | 1.45 | 0.46 | 4.56 | 5.21E-01 | 3.2E-02 | 1.13 |
| 397 | sphingomyelin                       | SM(36:2) (b)                   | 1.45 | 0.46 | 4.56 | 5.21E-01 | 3.2E-02 | 1.13 |
| 398 | phosphatidylethanolamine            | PE(38:5) (a)                   | 1.17 | 0.73 | 1.87 | 5.22E-01 | 1.0E-04 | 1.46 |
| 399 | alkenylphosphatidylcholine          | PC(P-18:0/22:6)                | 1.42 | 0.48 | 4.17 | 5.24E-01 | 4.8E-02 | 0.93 |
| 400 | lysophosphatidylcholine             | LPC(20:1) [sn2]                | 0.77 | 0.34 | 1.74 | 5.25E-01 | 1.1E-02 | 0.90 |
| 401 | alkenylphosphatidylcholine          | PC(P-16:0/16:0)                | 1.42 | 0.48 | 4.17 | 5.27E-01 | 4.6E-02 | 0.90 |
| 402 | lysoalkylphosphatidylcholine        | LPC(O-24:1)                    | 0.78 | 0.36 | 1.70 | 5.29E-01 | 3.7E-01 | 0.96 |
| 403 | sphingomyelin                       | SM(d18:1/24:1)                 | 0.71 | 0.24 | 2.07 | 5.29E-01 | 2.6E-01 | 1.00 |
| 404 | phosphatidylcholine                 | PC(16:0_18:2)                  | 1.63 | 0.36 | 7.41 | 5.30E-01 | 3.7E-03 | 0.94 |
| 405 | trihexosylceramide                  | Hex3Cer(d18:1/18:0)            | 1.23 | 0.64 | 2.40 | 5.33E-01 | 2.1E-01 | 0.90 |

|     |                                 |                     |      |      |      |          |         |      |
|-----|---------------------------------|---------------------|------|------|------|----------|---------|------|
| 406 | sphingomyelin                   | SM(37:2)            | 0.74 | 0.29 | 1.91 | 5.35E-01 | 1.7E-01 | 0.93 |
| 407 | phosphatidylcholine             | PC(40:10)           | 1.33 | 0.55 | 3.22 | 5.36E-01 | 2.1E-01 | 0.98 |
| 408 | phosphoinositol                 | PI(38:5)(b)         | 0.77 | 0.32 | 1.80 | 5.40E-01 | 3.8E-02 | 0.95 |
| 409 | phosphatidylethanolamine        | PE(16:0_20:3)       | 0.87 | 0.55 | 1.37 | 5.40E-01 | 4.5E-02 | 1.06 |
| 410 | diacylglycerol                  | DG(14:0_16:0)       | 0.93 | 0.73 | 1.18 | 5.43E-01 | 4.8E-02 | 1.39 |
| 411 | phosphatidylethanolamine        | PE(18:1_22:6)(b)    | 0.88 | 0.59 | 1.32 | 5.45E-01 | 3.7E-03 | 1.32 |
| 412 | trihexosylceramide              | Hex3Cer(d18:1/24:1) | 0.79 | 0.37 | 1.70 | 5.46E-01 | 7.9E-04 | 0.81 |
| 413 | dihexosylceramide               | Hex2Cer(d16:1/24:1) | 0.85 | 0.50 | 1.44 | 5.47E-01 | 1.9E-02 | 0.89 |
| 414 | cholesterol ester               | CE(24:5)            | 1.15 | 0.73 | 1.82 | 5.47E-01 | 1.3E-01 | 0.87 |
| 415 | phosphatidylethanolamine        | PE(16:1_20:4)       | 0.89 | 0.62 | 1.29 | 5.48E-01 | 5.0E-03 | 1.45 |
| 416 | lysophosphatidylcholine         | LPC(22:5)[sn2](n3)  | 1.29 | 0.56 | 3.01 | 5.48E-01 | 2.5E-01 | 0.99 |
| 417 | triacylglycerol                 | TG 56:7_NL 20:5     | 1.15 | 0.73 | 1.80 | 5.49E-01 | 5.8E-01 | 1.27 |
| 418 | diacylglycerol                  | DG(18:1_20:3)       | 1.14 | 0.74 | 1.75 | 5.50E-01 | 1.8E-11 | 2.08 |
| 419 | phosphatidylethanolamine        | PE(16:1_18:2)       | 1.12 | 0.76 | 1.65 | 5.51E-01 | 3.0E-01 | 1.09 |
| 420 | phosphoinositol                 | PI(18:0_22:5)(n6)   | 1.20 | 0.66 | 2.19 | 5.51E-01 | 4.3E-02 | 1.29 |
| 421 | phosphatidylethanolamine        | PE(16:0_16:0)       | 1.18 | 0.68 | 2.08 | 5.52E-01 | 1.6E-01 | 1.21 |
| 422 | phosphatidylethanolamine        | PE(16:0_18:3)(a)    | 0.89 | 0.60 | 1.31 | 5.56E-01 | 7.1E-01 | 0.98 |
| 423 | cholesterol ester               | CE(24:6)            | 0.82 | 0.42 | 1.60 | 5.58E-01 | 5.2E-02 | 1.00 |
| 424 | phosphatidylcholine             | PC(16:1_20:4)       | 0.87 | 0.56 | 1.36 | 5.59E-01 | 1.0E-04 | 1.35 |
| 425 | diacylglycerol                  | DG(17:0_16:0)       | 0.96 | 0.83 | 1.11 | 5.61E-01 | 1.0E-04 | 2.08 |
| 426 | lysophosphatidylcholine         | LPC(18:0)[sn1]      | 0.61 | 0.12 | 3.17 | 5.61E-01 | 1.3E-03 | 0.94 |
| 427 | phosphatidylcholine             | PC(17:0_18:1)       | 1.37 | 0.46 | 4.07 | 5.69E-01 | 2.3E-01 | 1.06 |
| 428 | phosphatidylcholine             | PC(18:0_22:5)(n6)   | 1.19 | 0.64 | 2.20 | 5.77E-01 | 3.5E-06 | 1.46 |
| 429 | lysophosphatidylethanolamine    | LPE(18:0)           | 0.73 | 0.23 | 2.25 | 5.80E-01 | 1.8E-01 | 1.01 |
| 430 | alkenylphosphatidylcholine      | PC(P-38:5)(a)       | 0.74 | 0.25 | 2.16 | 5.82E-01 | 1.1E-01 | 0.92 |
| 431 | cholesterol ester               | CE(16:1)            | 1.21 | 0.62 | 2.36 | 5.82E-01 | 4.9E-01 | 1.02 |
| 432 | phosphatidylcholine             | PC(20:0_20:4)       | 0.81 | 0.37 | 1.75 | 5.88E-01 | 8.1E-01 | 1.02 |
| 433 | cholesterol ester               | CE(22:6)            | 1.13 | 0.72 | 1.76 | 5.90E-01 | 3.8E-03 | 0.82 |
| 434 | triacylglycerol                 | TG 58:9_NL 22:6     | 1.10 | 0.78 | 1.54 | 5.92E-01 | 5.2E-01 | 1.41 |
| 435 | phosphatidylethanolamine        | PE(38:5)(b)         | 1.16 | 0.68 | 1.98 | 5.92E-01 | 3.6E-02 | 1.31 |
| 436 | triacylglycerol                 | TG 54:7_NL 20:5     | 1.11 | 0.76 | 1.63 | 5.93E-01 | 1.8E-01 | 1.51 |
| 437 | triacylglycerol                 | TG(16:0_16:0_18:0)  | 1.08 | 0.82 | 1.42 | 6.01E-01 | 1.8E-05 | 1.76 |
| 438 | cholesterol ester               | CE(14:0)            | 0.85 | 0.47 | 1.55 | 6.03E-01 | 5.0E-06 | 0.72 |
| 439 | triacylglycerol                 | TG(14:1_16:1_18:0)  | 1.10 | 0.77 | 1.58 | 6.07E-01 | 3.5E-08 | 1.90 |
| 440 | diacylglycerol                  | DG(18:1_18:3)       | 1.13 | 0.71 | 1.80 | 6.10E-01 | 4.4E-07 | 1.55 |
| 441 | phosphoinositol                 | PI(16:0/20:3)(b)    | 1.16 | 0.65 | 2.09 | 6.11E-01 | 2.9E-01 | 1.12 |
| 442 | GM3 ganglioside                 | GM3(d18:2/24:1)     | 1.15 | 0.68 | 1.94 | 6.13E-01 | 1.3E-01 | 0.93 |
| 443 | alkenylphosphatidylcholine      | PC(P-40:5)(b)       | 1.28 | 0.49 | 3.35 | 6.14E-01 | 7.8E-02 | 0.90 |
| 444 | alkenylphosphatidylcholine      | PC(P-16:0/18:1)     | 0.75 | 0.24 | 2.32 | 6.16E-01 | 5.2E-07 | 0.81 |
| 445 | alkenylphosphatidylethanolamine | PE(P-15:0/22:6)(a)  | 0.89 | 0.56 | 1.41 | 6.17E-01 | 4.5E-05 | 0.70 |
| 446 | ceramide                        | Cer(d17:1/22:0)     | 1.20 | 0.59 | 2.44 | 6.19E-01 | 1.7E-01 | 1.07 |
| 447 | phosphatidylcholine             | PC(16:0_16:0)       | 1.45 | 0.34 | 6.22 | 6.21E-01 | 2.9E-01 | 1.00 |
| 448 | phosphatidylcholine             | PC(16:0_20:4)       | 1.28 | 0.48 | 3.37 | 6.24E-01 | 4.3E-07 | 1.29 |
| 449 | ceramide                        | Cer(d18:2/26:0)     | 1.20 | 0.58 | 2.46 | 6.26E-01 | 3.9E-02 | 0.83 |
| 450 | alkylphosphatidylcholine        | PC(O-16:0/22:6)     | 1.20 | 0.57 | 2.55 | 6.29E-01 | 1.5E-01 | 0.93 |
| 451 | phosphoinositol                 | PI(18:0_18:1)       | 0.83 | 0.39 | 1.78 | 6.33E-01 | 1.7E-02 | 0.85 |
| 452 | ceramide                        | Cer(d18:2/14:0)     | 0.90 | 0.57 | 1.41 | 6.37E-01 | 6.9E-01 | 0.90 |
| 453 | alkenylphosphatidylcholine      | PC(P-40:5)(a)       | 0.80 | 0.32 | 2.03 | 6.37E-01 | 8.2E-03 | 0.88 |
| 454 | phosphoinositol                 | PI(34:1)            | 1.17 | 0.62 | 2.21 | 6.39E-01 | 4.8E-01 | 0.97 |
| 455 | phosphatidylcholine             | PC(17:0_20:4)       | 0.83 | 0.38 | 1.81 | 6.40E-01 | 3.7E-03 | 1.17 |
| 456 | oxidised cholesterol ester      | oxCE(18:2)[+2O]     | 0.87 | 0.50 | 1.53 | 6.42E-01 | 1.2E-02 | 0.80 |
| 457 | phosphatidylethanolamine        | PE(18:0_20:4)       | 1.13 | 0.67 | 1.92 | 6.46E-01 | 3.4E-09 | 1.62 |
| 458 | ceramide                        | Cer(d18:2/22:0)     | 1.20 | 0.55 | 2.60 | 6.46E-01 | 1.3E-01 | 1.13 |
| 459 | ceramide                        | Cer(d17:1/23:0)     | 1.17 | 0.60 | 2.27 | 6.49E-01 | 4.6E-01 | 0.93 |
| 460 | phosphoinositol                 | PI(40:4)            | 1.19 | 0.56 | 2.55 | 6.50E-01 | 1.8E-04 | 1.32 |
| 461 | phosphoinositol                 | PI(18:0_20:3)(b)    | 1.14 | 0.65 | 2.02 | 6.50E-01 | 2.5E-04 | 1.47 |
| 462 | trihexosylceramide              | Hex3Cer(d18:1/20:0) | 0.86 | 0.46 | 1.63 | 6.52E-01 | 8.6E-02 | 0.88 |
| 463 | monoalkyldiacylglycerol         | TG(O-52:0)          | 0.91 | 0.61 | 1.36 | 6.54E-01 | 6.2E-01 | 0.97 |
| 464 | lysophosphatidylcholine         | LPC(16:0)[sn1]      | 0.71 | 0.15 | 3.31 | 6.60E-01 | 2.8E-01 | 1.00 |
| 465 | alkenylphosphatidylethanolamine | PE(P-20:1/22:6)     | 0.91 | 0.58 | 1.41 | 6.60E-01 | 6.6E-02 | 0.79 |
| 466 | phosphoinositol                 | PI(18:0/20:2)       | 1.18 | 0.57 | 2.43 | 6.61E-01 | 3.2E-01 | 1.01 |
| 467 | lysophosphatidylcholine         | LPC(20:1)[sn1]      | 0.84 | 0.38 | 1.85 | 6.61E-01 | 7.1E-03 | 0.88 |
| 468 | cholesterol ester               | CE(18:2)            | 0.80 | 0.29 | 2.20 | 6.61E-01 | 2.4E-06 | 0.81 |
| 469 | triacylglycerol                 | TG(14:0_16:1_18:1)  | 0.92 | 0.63 | 1.34 | 6.62E-01 | 5.5E-04 | 1.38 |
| 470 | phosphatidylcholine             | PC(31:1)            | 0.88 | 0.50 | 1.55 | 6.63E-01 | 7.7E-01 | 0.95 |
| 471 | phosphatidylcholine             | PC(16:0_20:3)(a)    | 0.78 | 0.26 | 2.37 | 6.65E-01 | 8.7E-02 | 1.08 |
| 472 | phosphoinositol                 | PI(16:0/16:0)       | 1.09 | 0.73 | 1.64 | 6.68E-01 | 1.1E-02 | 0.78 |
| 473 | alkylphosphatidylcholine        | PC(O-36:0)          | 0.80 | 0.28 | 2.27 | 6.69E-01 | 5.7E-02 | 0.89 |
| 474 | cholesterol ester               | CE(18:0)            | 0.80 | 0.29 | 2.21 | 6.70E-01 | 2.9E-02 | 0.92 |
| 475 | trihexosylceramide              | Hex3Cer(d18:1/24:0) | 0.86 | 0.42 | 1.75 | 6.75E-01 | 5.0E-04 | 0.74 |
| 476 | triacylglycerol                 | TG(14:1_18:0_18:2)  | 1.12 | 0.66 | 1.88 | 6.76E-01 | 5.5E-08 | 1.62 |
| 477 | triacylglycerol                 | TG 56:9_NL 22:6     | 1.07 | 0.78 | 1.46 | 6.76E-01 | 2.3E-01 | 1.68 |
| 478 | lysophosphatidylcholine         | LPC(22:5)[sn1](n6)  | 1.13 | 0.62 | 2.06 | 6.81E-01 | 2.0E-01 | 1.10 |
| 479 | alkenylphosphatidylcholine      | PC(P-16:0/18:0)     | 0.80 | 0.27 | 2.38 | 6.85E-01 | 1.6E-02 | 0.84 |
| 480 | phosphatidylcholine             | PC(18:0_22:4)       | 0.87 | 0.44 | 1.71 | 6.89E-01 | 2.2E-04 | 1.27 |
| 481 | triacylglycerol                 | TG 56:7_NL 22:5(b)  | 0.90 | 0.54 | 1.51 | 6.92E-01 | 4.9E-09 | 1.72 |
| 482 | sphingomyelin                   | SM(44:1)            | 0.80 | 0.26 | 2.43 | 6.94E-01 | 1.9E-03 | 0.91 |
| 483 | desmosterol                     | DE(22:6)            | 1.10 | 0.67 | 1.81 | 6.98E-01 | 8.9E-01 | 1.12 |
| 484 | ceramide                        | Cer(d16:1/23:0)     | 1.13 | 0.60 | 2.13 | 6.99E-01 | 7.5E-01 | 1.03 |
| 485 | alkenylphosphatidylethanolamine | PE(P-18:1/20:4)(a)  | 0.92 | 0.58 | 1.44 | 7.02E-01 | 7.5E-01 | 0.81 |
| 486 | lysophosphatidylethanolamine    | LPE(20:4)           | 0.86 | 0.39 | 1.89 | 7.04E-01 | 8.2E-02 | 1.12 |
| 487 | GM3 ganglioside                 | GM3(d18:1/22:0)     | 1.19 | 0.49 | 2.91 | 7.05E-01 | 5.9E-01 | 0.97 |

|     |                                 |                            |      |      |      |          |         |      |
|-----|---------------------------------|----------------------------|------|------|------|----------|---------|------|
| 488 | monohexosylceramide             | HexCer(d18:2/18:0)         | 0.87 | 0.43 | 1.77 | 7.08E-01 | 6.5E-01 | 1.00 |
| 489 | triacylglycerol                 | TG(16:1_16:1_18:0)         | 0.92 | 0.59 | 1.44 | 7.10E-01 | 2.2E-02 | 1.15 |
| 490 | phosphoinositol                 | PI(16:0/20:3) (a)          | 0.87 | 0.43 | 1.78 | 7.12E-01 | 4.0E-02 | 0.90 |
| 491 | phosphatidylserine              | PS(36:2)                   | 1.11 | 0.64 | 1.93 | 7.15E-01 | 7.6E-04 | 1.23 |
| 492 | diacylglycerol                  | DG(18:1_20:4)              | 1.09 | 0.68 | 1.76 | 7.15E-01 | 1.8E-08 | 1.74 |
| 493 | ceramide                        | Cer(d18:2/24:0)            | 1.16 | 0.51 | 2.66 | 7.18E-01 | 4.3E-01 | 0.98 |
| 494 | lysophosphatidylcholine         | LPC(18:1) [sn1]            | 0.81 | 0.25 | 2.64 | 7.20E-01 | 3.1E-02 | 0.92 |
| 495 | phosphatidylcholine             | PC(33:0) (a)               | 0.85 | 0.35 | 2.07 | 7.20E-01 | 3.8E-01 | 0.91 |
| 496 | alkenylphosphatidylcholine      | PC(P-18:1/22:6)            | 1.16 | 0.51 | 2.65 | 7.21E-01 | 1.1E-03 | 0.91 |
| 497 | sulfatide                       | Sulfatide (d18:1/24:0(OH)) | 0.87 | 0.41 | 1.86 | 7.24E-01 | 1.2E-01 | 1.09 |
| 498 | alkylphosphatidylcholine        | PC(O-18:0/18:1)            | 0.80 | 0.23 | 2.77 | 7.26E-01 | 6.7E-02 | 0.91 |
| 499 | triacylglycerol                 | TG(18:1_18:1_20:4)         | 0.88 | 0.44 | 1.77 | 7.28E-01 | 4.6E-03 | 1.23 |
| 500 | trihexosylceramide              | Hex3Cer(d18:1/16:0)        | 1.19 | 0.45 | 3.10 | 7.29E-01 | 1.7E-02 | 0.88 |
| 501 | phosphatidylcholine             | PC(38:4) (b)               | 0.87 | 0.39 | 1.94 | 7.30E-01 | 3.4E-02 | 1.10 |
| 502 | alkenylphosphatidylcholine      | PC(P-16:0/20:5)            | 1.09 | 0.66 | 1.82 | 7.31E-01 | 4.1E-02 | 0.82 |
| 503 | monohexosylceramide             | HexCer(d18:2/20:0)         | 0.88 | 0.43 | 1.83 | 7.34E-01 | 3.8E-02 | 0.92 |
| 504 | alkenylphosphatidylcholine      | PC(P-35:2)(b)              | 0.95 | 0.72 | 1.26 | 7.37E-01 | 4.4E-03 | 0.64 |
| 505 | phosphoinositol                 | PI(18:0_20:4)              | 1.18 | 0.43 | 3.27 | 7.43E-01 | 2.2E-02 | 1.23 |
| 506 | sulfatide                       | Sulfatide (d18:1/16:0)     | 0.88 | 0.40 | 1.93 | 7.43E-01 | 7.8E-03 | 0.85 |
| 507 | dihexosylceramide               | Hex2Cer(d18:1/24:1)        | 0.90 | 0.47 | 1.71 | 7.45E-01 | 6.0E-03 | 0.82 |
| 508 | lysoalkylphosphatidylcholine    | LPC(O-22:0)                | 1.18 | 0.43 | 3.24 | 7.46E-01 | 3.8E-01 | 0.91 |
| 509 | desmosterol                     | DE(18:1)                   | 0.88 | 0.39 | 1.96 | 7.48E-01 | 2.3E-03 | 1.28 |
| 510 | phosphoinositol                 | PI(17:0_18:2) (a+b)        | 0.89 | 0.44 | 1.80 | 7.48E-01 | 5.5E-03 | 0.80 |
| 511 | phosphatidylethanolamine        | PE(15-MHDA_18:2)           | 0.93 | 0.60 | 1.45 | 7.55E-01 | 3.3E-01 | 0.97 |
| 512 | monohexosylceramide             | HexCer(d18:1/24:0)         | 1.14 | 0.50 | 2.61 | 7.62E-01 | 6.6E-03 | 0.89 |
| 513 | phosphatidylcholine             | PC(18:0_18:1)              | 1.18 | 0.40 | 3.54 | 7.63E-01 | 5.5E-01 | 1.05 |
| 514 | triacylglycerol                 | TG 58:10_NL 22:6           | 1.05 | 0.77 | 1.43 | 7.66E-01 | 6.0E-01 | 1.44 |
| 515 | alkenylphosphatidylethanolamine | PE(P-18:1/22:6) (b)        | 0.91 | 0.50 | 1.67 | 7.68E-01 | 3.4E-01 | 0.89 |
| 516 | phosphatidylcholine             | PC(15-MHDA_20:4)           | 0.91 | 0.47 | 1.75 | 7.69E-01 | 1.0E-02 | 1.09 |
| 517 | phosphatidylethanolamine        | PE(16:0_18:3) (b)          | 1.05 | 0.75 | 1.47 | 7.70E-01 | 1.1E-01 | 1.18 |
| 518 | phosphatidylethanolamine        | PE(16:0_20:4)              | 1.08 | 0.63 | 1.85 | 7.70E-01 | 2.2E-05 | 1.41 |
| 519 | ceramide                        | Cer(d17:1/16:0)            | 0.88 | 0.36 | 2.12 | 7.72E-01 | 9.5E-01 | 1.02 |
| 520 | ceramide                        | Cer(d16:1/16:0)            | 1.12 | 0.53 | 2.37 | 7.74E-01 | 3.7E-01 | 1.08 |
| 521 | lysophosphatidylethanolamine    | LPE(16:0)                  | 1.15 | 0.44 | 3.04 | 7.76E-01 | 2.1E-01 | 1.00 |
| 522 | lysophosphatidylcholine         | LPC(16:1) [sn2]            | 1.12 | 0.51 | 2.47 | 7.76E-01 | 5.5E-02 | 1.13 |
| 523 | cholesterol ester               | CE(20:4)                   | 0.88 | 0.35 | 2.19 | 7.76E-01 | 9.2E-01 | 0.99 |
| 524 | phosphatidylcholine             | PC(14:0_22:6)              | 0.91 | 0.47 | 1.75 | 7.77E-01 | 1.6E-03 | 0.93 |
| 525 | alkylphosphatidylcholine        | PC(O-16:0/16:0)            | 0.84 | 0.26 | 2.78 | 7.78E-01 | 3.5E-01 | 0.92 |
| 526 | lysophosphatidylcholine         | LPC(20:5) [sn1]            | 1.07 | 0.67 | 1.72 | 7.85E-01 | 4.6E-02 | 0.94 |
| 527 | phosphatidylcholine             | PC(18:0_20:4)              | 1.13 | 0.47 | 2.73 | 7.86E-01 | 8.3E-08 | 1.34 |
| 528 | sphingomyelin                   | SM(44:3)                   | 0.87 | 0.32 | 2.35 | 7.86E-01 | 2.1E-02 | 0.89 |
| 529 | alkenylphosphatidylethanolamine | PE(P-16:0/20:5)            | 1.06 | 0.70 | 1.61 | 7.91E-01 | 7.4E-03 | 0.75 |
| 530 | phosphatidylethanolamine        | PE(18:1_18:2)              | 0.95 | 0.63 | 1.42 | 7.93E-01 | 9.7E-01 | 0.94 |
| 531 | monohexosylceramide             | HexCer(d18:2/24:0)         | 0.90 | 0.39 | 2.07 | 8.02E-01 | 4.7E-04 | 0.84 |
| 532 | desmosterol                     | DE(20:5)                   | 1.05 | 0.70 | 1.59 | 8.03E-01 | 9.0E-01 | 1.18 |
| 533 | trihexosylceramide              | Hex3Cer(d18:1/22:0)        | 0.92 | 0.45 | 1.84 | 8.03E-01 | 1.6E-05 | 0.72 |
| 534 | sphingomyelin                   | SM(d18:0/16:0)             | 0.90 | 0.38 | 2.16 | 8.13E-01 | 9.4E-01 | 0.93 |
| 535 | phosphatidylcholine             | PC(18:1_22:6) (b)          | 1.06 | 0.66 | 1.68 | 8.15E-01 | 5.2E-01 | 1.11 |
| 536 | phosphatidylethanolamine        | PE(16:0_18:2)              | 1.06 | 0.66 | 1.69 | 8.19E-01 | 1.0E-01 | 1.14 |
| 537 | phosphatidylcholine             | PC(15-MHDA_18:2)           | 0.94 | 0.53 | 1.65 | 8.24E-01 | 6.1E-02 | 0.83 |
| 538 | monohexosylceramide             | HexCer(d18:1/22:0)         | 1.10 | 0.48 | 2.51 | 8.25E-01 | 4.2E-03 | 0.88 |
| 539 | monohexosylceramide             | HexCer(d18:1/18:0)         | 0.91 | 0.39 | 2.12 | 8.29E-01 | 3.8E-01 | 1.03 |
| 540 | ceramide                        | Cer(d19:1/26:0)            | 0.95 | 0.57 | 1.57 | 8.31E-01 | 6.1E-01 | 0.99 |
| 541 | alkenylphosphatidylcholine      | PC(P-16:0/14:0)            | 0.92 | 0.41 | 2.07 | 8.34E-01 | 4.6E-04 | 0.80 |
| 542 | phosphatidylglycerol            | PG(36:2)                   | 1.05 | 0.66 | 1.68 | 8.35E-01 | 2.3E-07 | 1.58 |
| 543 | phosphatidylethanolamine        | PE(18:0_20:3) (b)          | 0.95 | 0.57 | 1.57 | 8.38E-01 | 1.3E-04 | 1.49 |
| 544 | GM3 ganglioside                 | GM3(d18:1/16:0)            | 0.90 | 0.34 | 2.44 | 8.43E-01 | 6.7E-02 | 0.93 |
| 545 | phosphatidylcholine             | PC(15-MHDA_18:1)           | 1.06 | 0.59 | 1.89 | 8.50E-01 | 1.2E-01 | 1.03 |
| 546 | monohexosylceramide             | HexCer(d18:1/24:1)         | 1.08 | 0.50 | 2.32 | 8.51E-01 | 7.1E-02 | 0.94 |
| 547 | lysophosphatidylcholine         | LPC(20:5) [sn2]            | 1.05 | 0.65 | 1.70 | 8.54E-01 | 5.2E-02 | 0.96 |
| 548 | alkenylphosphatidylethanolamine | PE(P-18:0/20:5)            | 0.96 | 0.62 | 1.49 | 8.59E-01 | 6.4E-03 | 0.72 |
| 549 | ceramide                        | Cer(d18:2/16:0)            | 0.91 | 0.32 | 2.61 | 8.60E-01 | 7.0E-01 | 1.04 |
| 550 | monohexosylceramide             | HexCer(d18:1/16:0)         | 0.93 | 0.42 | 2.05 | 8.62E-01 | 2.4E-02 | 0.92 |
| 551 | triacylglycerol                 | TG(14:0_16:0_18:1)         | 0.97 | 0.64 | 1.46 | 8.69E-01 | 4.7E-03 | 1.26 |
| 552 | alkenylphosphatidylethanolamine | PE(P-18:1/22:6) (a)        | 1.05 | 0.59 | 1.88 | 8.71E-01 | 9.3E-03 | 0.86 |
| 553 | triacylglycerol                 | TG(14:1_18:1_18:1)         | 1.05 | 0.57 | 1.95 | 8.71E-01 | 1.8E-10 | 1.53 |
| 554 | triacylglycerol                 | TG(16:0_17:0_18:0)         | 1.02 | 0.81 | 1.29 | 8.74E-01 | 2.1E-04 | 1.59 |
| 555 | alkenylphosphatidylcholine      | PC(P-16:0/16:1)            | 0.93 | 0.37 | 2.34 | 8.77E-01 | 4.2E-02 | 0.88 |
| 556 | phosphatidylcholine             | PC(33:1)                   | 1.09 | 0.38 | 3.10 | 8.78E-01 | 4.0E-01 | 1.03 |
| 557 | lysophosphatidylinositol        | LPI(20:4)                  | 1.05 | 0.54 | 2.05 | 8.83E-01 | 9.0E-02 | 1.26 |
| 558 | phosphatidylethanolamine        | PE(18:0_18:2)              | 0.97 | 0.62 | 1.51 | 8.83E-01 | 2.2E-01 | 1.12 |
| 559 | phosphatidylethanolamine        | PE(15-MHDA_22:6)           | 1.04 | 0.64 | 1.67 | 8.86E-01 | 3.0E-03 | 1.31 |
| 560 | diacylglycerol                  | DG(16:0_20:4)              | 1.03 | 0.67 | 1.58 | 8.87E-01 | 2.0E-08 | 1.70 |
| 561 | alkenylphosphatidylethanolamine | PE(P-17:0/22:6) (a)        | 1.04 | 0.56 | 1.97 | 8.91E-01 | 6.7E-02 | 0.85 |
| 562 | sphingomyelin                   | SM(d16:1/19:0)             | 1.08 | 0.37 | 3.17 | 8.94E-01 | 9.2E-01 | 0.98 |
| 563 | lysophosphatidylcholine         | LPC(22:1) [sn2]            | 0.96 | 0.56 | 1.66 | 8.96E-01 | 1.2E-03 | 0.91 |
| 564 | triacylglycerol                 | TG(14:0_18:0_18:1)         | 1.02 | 0.74 | 1.40 | 9.00E-01 | 1.6E-03 | 1.42 |
| 565 | triacylglycerol                 | TG(16:0_16:1_17:0)         | 1.02 | 0.70 | 1.50 | 9.01E-01 | 1.2E-03 | 1.32 |
| 566 | lysophosphatidylinositol        | LPI(18:2)                  | 0.96 | 0.54 | 1.73 | 9.03E-01 | 2.7E-03 | 0.85 |
| 567 | triacylglycerol                 | TG(14:0_17:0_18:1)         | 0.98 | 0.65 | 1.46 | 9.05E-01 | 1.5E-02 | 1.19 |
| 568 | phosphatidylcholine             | PC(35:5)                   | 1.03 | 0.65 | 1.63 | 9.07E-01 | 8.1E-03 | 0.88 |
| 569 | monohexosylceramide             | HexCer(d18:2/22:0)         | 1.05 | 0.47 | 2.32 | 9.09E-01 | 7.4E-04 | 0.84 |

|     |                                 |                            |      |      |      |          |         |      |
|-----|---------------------------------|----------------------------|------|------|------|----------|---------|------|
| 570 | triacylglycerol                 | TG(15:0_16:0_18:1)         | 0.97 | 0.63 | 1.52 | 9.09E-01 | 6.1E-03 | 1.23 |
| 571 | diacylglycerol                  | DG(17:0_18:2)              | 1.03 | 0.63 | 1.67 | 9.13E-01 | 2.4E-04 | 1.35 |
| 572 | alkenylphosphatidylethanolamine | PE(P-18:0/22:6)            | 1.04 | 0.50 | 2.15 | 9.15E-01 | 1.1E-02 | 0.84 |
| 573 | sphingomyelin                   | SM(44:2)                   | 0.95 | 0.37 | 2.49 | 9.22E-01 | 3.1E-01 | 1.02 |
| 574 | diacylglycerol                  | DG(17:1_16:0)              | 1.02 | 0.71 | 1.45 | 9.22E-01 | 1.0E-08 | 1.94 |
| 575 | sphingomyelin                   | SM(d18:0/14:0)             | 0.96 | 0.39 | 2.36 | 9.26E-01 | 4.5E-01 | 0.95 |
| 576 | cholesterol ester               | CE(17:1)                   | 1.03 | 0.52 | 2.04 | 9.30E-01 | 5.0E-01 | 1.02 |
| 577 | alkenylphosphatidylethanolamine | PE(P-18:1/20:5) (b)        | 0.98 | 0.68 | 1.42 | 9.31E-01 | 5.6E-02 | 0.71 |
| 578 | sphingomyelin                   | SM(d18:1/22:0)/SM(d16:1/2) | 0.94 | 0.21 | 4.25 | 9.32E-01 | 7.5E-03 | 0.96 |
| 579 | phosphatidylcholine             | PC(18:0_20:3)              | 0.97 | 0.42 | 2.21 | 9.34E-01 | 8.2E-04 | 1.22 |
| 580 | alkenylphosphatidylethanolamine | PE(P-17:0/22:6) (b)        | 1.03 | 0.56 | 1.89 | 9.36E-01 | 3.6E-02 | 0.86 |
| 581 | dihexosylceramide               | Hex2Cer(d18:1/16:0)        | 0.96 | 0.34 | 2.68 | 9.37E-01 | 1.7E-02 | 0.91 |
| 582 | lysophosphatidylinositol        | LPI(18:0)                  | 0.97 | 0.48 | 1.96 | 9.40E-01 | 9.3E-01 | 1.11 |
| 583 | alkylphosphatidylethanolamine   | PE(O-36:6)                 | 0.98 | 0.65 | 1.49 | 9.41E-01 | 1.5E-02 | 0.75 |
| 584 | alkenylphosphatidylethanolamine | PE(P-18:1/20:5) (a)        | 0.98 | 0.64 | 1.50 | 9.41E-01 | 3.9E-04 | 0.69 |
| 585 | ceramide                        | Cer(d18:2/23:0)            | 1.03 | 0.47 | 2.28 | 9.42E-01 | 2.7E-01 | 0.97 |
| 586 | phosphoinositol                 | PI(16:0_20:4)              | 0.98 | 0.44 | 2.16 | 9.51E-01 | 9.4E-01 | 1.08 |
| 587 | phosphoinositol                 | PI(35:1)                   | 1.02 | 0.54 | 1.92 | 9.51E-01 | 2.3E-01 | 0.90 |
| 588 | phosphatidylethanolamine        | PE(18:0_20:3) (a)          | 0.99 | 0.64 | 1.53 | 9.53E-01 | 1.6E-05 | 1.48 |
| 589 | lysophosphatidylcholine         | LPC(19:1) (c)              | 0.97 | 0.31 | 2.99 | 9.55E-01 | 2.1E-03 | 0.89 |
| 590 | lysophosphatidylcholine         | LPC(16:1) [sn1]            | 1.03 | 0.39 | 2.69 | 9.59E-01 | 1.1E-01 | 1.08 |
| 591 | phosphatidylserine              | PS(38:4)                   | 0.99 | 0.63 | 1.56 | 9.60E-01 | 3.7E-01 | 1.01 |
| 592 | phosphoinositol                 | PI(36:2) (a+b)             | 1.02 | 0.47 | 2.20 | 9.61E-01 | 4.9E-04 | 0.85 |
| 593 | triacylglycerol                 | TG(14:1_16:0_18:1)         | 0.99 | 0.72 | 1.38 | 9.68E-01 | 1.1E-03 | 1.50 |
| 594 | alkylphosphatidylcholine        | PC(O-36:5)                 | 1.01 | 0.61 | 1.67 | 9.69E-01 | 8.3E-03 | 0.80 |
| 595 | diacylglycerol                  | DG(15:0_18:1)              | 1.01 | 0.66 | 1.54 | 9.69E-01 | 2.4E-05 | 1.50 |
| 596 | phosphatidylethanolamine        | PE(18:0_22:4)              | 1.01 | 0.70 | 1.46 | 9.69E-01 | 1.2E-07 | 1.67 |
| 597 | triacylglycerol                 | TG(16:1_16:1_16:1)         | 0.99 | 0.70 | 1.40 | 9.70E-01 | 1.4E-04 | 1.67 |
| 598 | alkylphosphatidylcholine        | PC(O-40:7) (b)             | 1.02 | 0.44 | 2.37 | 9.71E-01 | 9.8E-01 | 1.02 |
| 599 | cholesterol ester               | CE(20:2)                   | 0.98 | 0.30 | 3.15 | 9.71E-01 | 1.6E-01 | 1.05 |
| 600 | alkenylphosphatidylcholine      | PC(P-20:0/20:4)            | 1.02 | 0.42 | 2.47 | 9.72E-01 | 5.1E-01 | 0.98 |
| 601 | triacylglycerol                 | TG(14:0_16:0_18:2)         | 0.99 | 0.69 | 1.43 | 9.72E-01 | 6.3E-04 | 1.46 |
| 602 | alkenylphosphatidylethanolamine | PE(P-16:0/22:6)            | 1.01 | 0.43 | 2.36 | 9.84E-01 | 1.4E-01 | 0.94 |
| 603 | diacylglycerol                  | DG(14:0_18:1)              | 1.00 | 0.71 | 1.41 | 9.86E-01 | 1.6E-04 | 1.57 |
| 604 | triacylglycerol                 | TG(18:0_18:0_18:0)         | 1.00 | 0.79 | 1.26 | 9.87E-01 | 2.5E-03 | 1.48 |
| 605 | lysophosphatidylcholine         | LPC(22:1) [sn1]            | 1.00 | 0.57 | 1.73 | 9.88E-01 | 4.8E-03 | 0.89 |
| 606 | phosphatidylcholine             | PC(44:12)                  | 1.00 | 0.72 | 1.39 | 9.92E-01 | 2.3E-04 | 0.77 |
| 607 | phosphatidylethanolamine        | PE(16:0_20:5)              | 1.00 | 0.66 | 1.53 | 9.92E-01 | 8.3E-01 | 1.16 |
| 608 | phosphatidylethanolamine        | PE(18:1_18:1)              | 1.00 | 0.71 | 1.41 | 9.97E-01 | 4.2E-02 | 1.23 |
| 609 | sphingomyelin                   | SM(d18:1/20:0)/SM(d16:1/2) | 1.00 | 0.28 | 3.55 | 9.98E-01 | 3.6E-01 | 1.02 |

**List B. Lipids associated with testosterone suppression failure in mHSPC**

| cox regression rank | Lipid type               | Lipid name                    | Hazard ratio | lower 95% CI | upper 95% CI | Hazard ratio P-value | t-test Profile H3 vs H1, P-value | fold, Profile H3/H1 |
|---------------------|--------------------------|-------------------------------|--------------|--------------|--------------|----------------------|----------------------------------|---------------------|
| 1                   | phosphatidylcholine      | PC(28:0)                      | 0.51         | 0.33         | 0.79         | 1.76E-03             | 2.1E-04                          | 0.35                |
| 2                   | triacylglycerol          | TG(48:3) [NL-16:1]            | 0.59         | 0.40         | 0.85         | 3.96E-03             | 2.0E-08                          | 0.23                |
| 3                   | triacylglycerol          | TG(48:3) [NL-14:0]            | 0.68         | 0.52         | 0.88         | 4.24E-03             | 2.9E-08                          | 0.12                |
| 4                   | ceramide                 | Cer(d20:1/24:1)               | 4.10         | 1.48         | 11.38        | 4.27E-03             | 9.6E-03                          | 1.41                |
| 5                   | diacylglycerol           | DG(14:0_16:0)                 | 0.67         | 0.50         | 0.91         | 4.31E-03             | 9.5E-09                          | 0.13                |
| 6                   | diacylglycerol           | DG(16:0_16:1)                 | 0.51         | 0.31         | 0.82         | 5.86E-03             | 7.0E-09                          | 0.40                |
| 7                   | phosphatidylcholine      | PC(14:0_16:0)                 | 0.36         | 0.17         | 0.77         | 6.14E-03             | 5.9E-03                          | 0.64                |
| 8                   | diacylglycerol           | DG(14:0_18:2)                 | 0.54         | 0.34         | 0.85         | 6.74E-03             | 1.6E-06                          | 0.33                |
| 9                   | triacylglycerol          | TG(48:2) [SIM]                | 0.57         | 0.38         | 0.86         | 7.67E-03             | 6.5E-07                          | 0.26                |
| 10                  | ceramide                 | Cer(d19:1/16:0)               | 2.09         | 1.20         | 3.64         | 8.26E-03             | 4.9E-03                          | 1.79                |
| 11                  | ceramide                 | Cer(d18:1/19:0)               | 2.18         | 1.21         | 3.92         | 8.61E-03             | 1.3E-03                          | 1.81                |
| 12                  | triacylglycerol          | TG(48:3) [SIM]                | 0.62         | 0.43         | 0.91         | 8.62E-03             | 1.1E-06                          | 0.22                |
| 13                  | deoxyceramide            | Cer(m18:0/23:0)               | 0.51         | 0.31         | 0.83         | 9.09E-03             | 4.7E-04                          | 0.45                |
| 14                  | sphingomyelin            | SM(38:3) (a)                  | 4.10         | 1.38         | 12.16        | 9.45E-03             | 4.1E-07                          | 1.71                |
| 15                  | triacylglycerol          | TG(56:6) [NL-20:4]            | 2.40         | 1.25         | 4.63         | 1.02E-02             | 1.6E-04                          | 1.89                |
| 16                  | phosphatidylcholine      | PC(32:2)                      | 0.34         | 0.15         | 0.78         | 1.16E-02             | 2.4E-03                          | 0.62                |
| 17                  | acylcarnitine            | AC(15:0)                      | 2.79         | 1.23         | 6.33         | 1.17E-02             | 1.9E-03                          | 1.72                |
| 18                  | sphingomyelin            | SM(38:3) (b)                  | 2.88         | 1.24         | 6.73         | 1.33E-02             | 4.3E-05                          | 1.79                |
| 19                  | monohexosylceramide      | HexCer(d18:1/18:0)            | 3.42         | 1.22         | 9.59         | 1.46E-02             | 2.6E-03                          | 1.44                |
| 20                  | ceramide                 | Cer(d18:2/18:0)               | 2.43         | 1.13         | 5.23         | 1.50E-02             | 1.1E-01                          | 1.31                |
| 21                  | triacylglycerol          | TG(50:4) [NL-18:3]            | 0.63         | 0.44         | 0.92         | 1.53E-02             | 2.0E-07                          | 0.27                |
| 22                  | triacylglycerol          | TG(48:2) [NL-16:1]            | 0.61         | 0.40         | 0.91         | 1.67E-02             | 9.6E-09                          | 0.29                |
| 23                  | sphingomyelin            | SM(d18:1/17:0)/SM(d17:1/17:0) | 2.71         | 1.13         | 6.45         | 1.67E-02             | 2.5E-06                          | 1.79                |
| 24                  | triacylglycerol          | TG(48:2) [NL-14:0]            | 0.63         | 0.43         | 0.91         | 1.69E-02             | 7.1E-07                          | 0.23                |
| 25                  | triacylglycerol          | TG(48:3) [NL-18:3]            | 0.73         | 0.57         | 0.95         | 1.71E-02             | 1.2E-07                          | 0.11                |
| 26                  | free fatty acid          | FA(18:0)                      | 6.73         | 1.41         | 32.11        | 1.78E-02             | 1.1E-04                          | 1.27                |
| 27                  | diacylglycerol           | DG(16:1_18:1)                 | 0.58         | 0.37         | 0.90         | 1.81E-02             | 9.3E-06                          | 0.48                |
| 28                  | triacylglycerol          | TG(50:4) [SIM]                | 0.58         | 0.37         | 0.93         | 1.88E-02             | 3.0E-06                          | 0.35                |
| 29                  | deoxyceramide            | Cer(m18:1/24:0)               | 0.55         | 0.33         | 0.91         | 1.99E-02             | 1.1E-03                          | 0.50                |
| 30                  | GM3 ganglioside          | GM3(d18:1/20:0)               | 2.56         | 1.12         | 5.87         | 2.01E-02             | 3.5E-03                          | 1.43                |
| 31                  | ceramide                 | Cer(d18:1/18:0)               | 3.27         | 1.17         | 9.16         | 2.12E-02             | 8.3E-03                          | 1.30                |
| 32                  | triacylglycerol          | TG(48:2) [NL-14:1]            | 0.69         | 0.51         | 0.94         | 2.16E-02             | 8.9E-08                          | 0.20                |
| 33                  | sphingomyelin            | SM(d18:2/18:1)                | 5.53         | 1.31         | 23.39        | 2.17E-02             | 1.5E-04                          | 1.39                |
| 34                  | triacylglycerol          | TG(48:1) [NL-16:1]            | 0.65         | 0.45         | 0.94         | 2.18E-02             | 1.6E-10                          | 0.24                |
| 35                  | sphingomyelin            | SM(d18:2/17:0)                | 4.21         | 1.19         | 14.86        | 2.18E-02             | 1.1E-05                          | 1.50                |
| 36                  | sphingomyelin            | SM(d16:1/19:0)                | 5.93         | 1.26         | 27.93        | 2.18E-02             | 1.0E-04                          | 1.32                |
| 37                  | acylcarnitine            | AC(18:0)                      | 3.35         | 1.35         | 8.34         | 2.30E-02             | 6.1E-02                          | 1.43                |
| 38                  | deoxyceramide            | Cer(m18:1/23:0)               | 0.58         | 0.36         | 0.92         | 2.33E-02             | 3.9E-03                          | 0.51                |
| 39                  | phosphatidylethanolamine | PE(16:0_16:1)                 | 0.66         | 0.47         | 0.93         | 2.33E-02             | 2.5E-03                          | 0.42                |
| 40                  | cholesterol ester        | CE(16:0)                      | 5.24         | 1.14         | 24.19        | 2.38E-02             | 1.8E-03                          | 1.30                |
| 41                  | deoxyceramide            | Cer(m18:0/22:0)               | 0.60         | 0.38         | 0.93         | 2.42E-02             | 3.2E-04                          | 0.45                |
| 42                  | dihexosylceramide        | Hex2Cer(d16:1/16:0)           | 0.35         | 0.15         | 0.84         | 2.44E-02             | 7.3E-01                          | 1.05                |
| 43                  | phosphatidic acid        | PA(36:1)                      | 0.41         | 0.19         | 0.89         | 2.44E-02             | 2.9E-01                          | 0.82                |
| 44                  | triacylglycerol          | TG(49:1) [NL-17:1]            | 0.58         | 0.36         | 0.94         | 2.48E-02             | 8.7E-08                          | 0.35                |
| 45                  | triacylglycerol          | TG(48:2) [NL-18:2]            | 0.65         | 0.44         | 0.95         | 2.58E-02             | 7.7E-07                          | 0.24                |
| 46                  | sphingomyelin            | SM(d18:2/20:0)                | 3.49         | 1.17         | 10.38        | 2.60E-02             | 9.1E-06                          | 1.47                |
| 47                  | triacylglycerol          | TG(50:3) [NL-18:2]            | 0.47         | 0.25         | 0.88         | 2.64E-02             | 4.5E-04                          | 0.59                |
| 48                  | phosphatidylinositol     | PI(16:0_16:1)                 | 0.64         | 0.43         | 0.95         | 2.70E-02             | 2.0E-02                          | 0.46                |
| 49                  | triacylglycerol          | TG(50:4) [NL-20:4]            | 0.75         | 0.57         | 0.97         | 2.78E-02             | 3.0E-08                          | 0.13                |
| 50                  | triacylglycerol          | TG(50:3) [SIM]                | 0.43         | 0.21         | 0.89         | 2.85E-02             | 6.5E-05                          | 0.57                |
| 51                  | ceramide                 | Cer(d19:1/18:0)               | 1.82         | 1.04         | 3.20         | 2.97E-02             | 1.2E-01                          | 1.40                |
| 52                  | triacylglycerol          | TG(48:1) [NL-18:1]            | 0.63         | 0.42         | 0.95         | 2.99E-02             | 1.1E-06                          | 0.26                |
| 53                  | lysophosphatidylcholine  | LPC(14:0) [sn2]               | 0.43         | 0.21         | 0.91         | 3.14E-02             | 1.6E-04                          | 0.56                |
| 54                  | triacylglycerol          | TG(48:1) [SIM]                | 0.63         | 0.41         | 0.96         | 3.19E-02             | 2.9E-07                          | 0.27                |
| 55                  | lysophosphatidylcholine  | LPC(14:0) [sn1]               | 0.47         | 0.24         | 0.91         | 3.51E-02             | 1.5E-03                          | 0.56                |
| 56                  | triacylglycerol          | TG(50:2) [NL-18:1]            | 0.48         | 0.25         | 0.93         | 3.52E-02             | 3.7E-03                          | 0.61                |
| 57                  | triacylglycerol          | TG(52:5) [NL-20:4]            | 0.68         | 0.48         | 0.97         | 3.67E-02             | 6.5E-08                          | 0.28                |
| 58                  | triacylglycerol          | TG(50:3) [NL-14:0]            | 0.53         | 0.30         | 0.96         | 3.70E-02             | 3.6E-03                          | 0.51                |
| 59                  | ceramide                 | Cer(d19:1/20:0)               | 2.08         | 1.01         | 4.29         | 3.70E-02             | 1.4E-01                          | 1.26                |
| 60                  | triacylglycerol          | TG(48:0) [SIM]                | 0.66         | 0.45         | 0.98         | 3.81E-02             | 1.6E-06                          | 0.26                |
| 61                  | acylcarnitine            | AC(14:1)                      | 1.69         | 1.03         | 2.79         | 3.83E-02             | 1.7E-05                          | 2.61                |
| 62                  | deoxyceramide            | Cer(m18:1/22:0)               | 0.63         | 0.40         | 0.98         | 3.85E-02             | 1.8E-03                          | 0.48                |
| 63                  | ceramide                 | Cer(d18:1/14:0)               | 0.32         | 0.11         | 0.96         | 3.90E-02             | 2.5E-01                          | 0.86                |
| 64                  | triacylglycerol          | TG(54:7) [NL-22:6]            | 0.59         | 0.36         | 0.97         | 3.91E-02             | 4.5E-04                          | 0.49                |
| 65                  | lysophosphatidylinositol | LPI(18:0) [sn2]               | 2.43         | 0.99         | 5.95         | 4.14E-02             | 2.1E-02                          | 1.37                |
| 66                  | deoxyceramide            | Cer(m18:0/24:0)               | 0.58         | 0.35         | 0.98         | 4.14E-02             | 1.3E-04                          | 0.50                |
| 67                  | triacylglycerol          | TG(50:4) [NL-14:0]            | 0.70         | 0.50         | 0.99         | 4.18E-02             | 1.1E-04                          | 0.30                |
| 68                  | acylcarnitine            | AC(14:2)                      | 1.86         | 1.01         | 3.43         | 4.25E-02             | 6.8E-05                          | 2.20                |
| 69                  | diacylglycerol           | DG(16:0_16:0)                 | 0.70         | 0.48         | 1.00         | 4.27E-02             | 1.6E-06                          | 0.28                |
| 70                  | triacylglycerol          | TG(49:1) [SIM]                | 0.59         | 0.35         | 1.00         | 4.31E-02             | 3.2E-06                          | 0.40                |
| 71                  | sphingomyelin            | SM(d18:2/18:0)                | 2.49         | 1.02         | 6.08         | 4.32E-02             | 9.9E-05                          | 1.58                |
| 72                  | ceramide                 | Cer(d18:1/24:1)               | 4.61         | 1.04         | 20.42        | 4.37E-02             | 4.4E-03                          | 1.24                |
| 73                  | free fatty acid          | FA(16:2)                      | 1.66         | 1.08         | 2.55         | 4.41E-02             | 4.2E-02                          | 1.64                |
| 74                  | triacylglycerol          | TG(48:0) [NL-16:0]            | 0.69         | 0.48         | 0.99         | 4.55E-02             | 2.0E-06                          | 0.26                |
| 75                  | triacylglycerol          | TG(48:0) [NL-18:0]            | 0.75         | 0.56         | 1.00         | 4.66E-02             | 3.5E-08                          | 0.15                |
| 76                  | phosphatidylcholine      | PC(32:1)                      | 0.51         | 0.26         | 1.02         | 4.96E-02             | 3.7E-02                          | 0.66                |
| 77                  | sphingomyelin            | SM(d19:1/24:1)                | 2.93         | 0.97         | 8.90         | 4.97E-02             | 1.3E-06                          | 1.44                |

|     |                                  |                                |      |      |       |          |         |      |
|-----|----------------------------------|--------------------------------|------|------|-------|----------|---------|------|
| 78  | sphingomyelin                    | SM(37:1)                       | 2.59 | 0.98 | 6.85  | 5.07E-02 | 1.7E-04 | 1.60 |
| 79  | ceramide                         | Cer(d19:1/24:1)                | 2.23 | 0.96 | 5.19  | 5.23E-02 | 1.9E-02 | 1.34 |
| 80  | sphingomyelin                    | SM(37:2)                       | 2.74 | 0.98 | 7.71  | 5.37E-02 | 1.1E-06 | 1.66 |
| 81  | deoxyceramide                    | Cer(m18:0/20:0)                | 0.64 | 0.41 | 1.00  | 5.48E-02 | 2.8E-03 | 0.50 |
| 82  | phosphatidylinositol             | PI(34:1)                       | 0.45 | 0.20 | 1.02  | 5.50E-02 | 1.5E-01 | 0.80 |
| 83  | dihexosylceramide                | Hex2Cer(d18:1/20:0)            | 2.35 | 0.98 | 5.67  | 5.63E-02 | 1.8E-03 | 1.38 |
| 84  | triacylglycerol                  | TG(50:1) [NL-14:0]             | 0.69 | 0.47 | 1.03  | 5.72E-02 | 1.5E-07 | 0.24 |
| 85  | triacylglycerol                  | TG(49:1) [NL-16:1]             | 0.54 | 0.28 | 1.04  | 5.73E-02 | 6.3E-05 | 0.54 |
| 86  | phosphatidylcholine              | PC(33:1)                       | 0.27 | 0.07 | 1.03  | 5.73E-02 | 1.2E-01 | 0.87 |
| 87  | phosphatidylserine               | PS(38:5)                       | 1.59 | 0.98 | 2.59  | 5.77E-02 | 8.5E-03 | 1.98 |
| 88  | diacylglycerol                   | DG(16:0_20:4)                  | 0.58 | 0.33 | 1.03  | 5.97E-02 | 2.3E-06 | 0.52 |
| 89  | acylcarnitine                    | AC(13:0)                       | 1.48 | 0.98 | 2.24  | 6.09E-02 | 1.5E-02 | 2.13 |
| 90  | sphingomyelin                    | SM(d18:1/18:0)/SM(d16:1/20:0)  | 3.97 | 0.90 | 17.54 | 6.22E-02 | 1.7E-05 | 1.36 |
| 91  | triacylglycerol                  | TG(50:3) [NL-16:1]             | 0.58 | 0.33 | 1.00  | 6.32E-02 | 9.2E-04 | 0.55 |
| 92  | ceramide                         | Cer(d18:2/16:0)                | 2.98 | 0.89 | 10.06 | 6.33E-02 | 1.8E-02 | 1.31 |
| 93  | cholesterol ester                | CE(20:2)                       | 3.66 | 0.89 | 14.99 | 6.51E-02 | 7.2E-03 | 1.21 |
| 94  | dihydroceramide                  | Cer(d18:0/18:0)                | 1.58 | 0.95 | 2.61  | 6.54E-02 | 2.1E-02 | 1.78 |
| 95  | deoxyceramide                    | Cer(m18:1/24:1)                | 0.66 | 0.44 | 1.01  | 6.64E-02 | 5.6E-02 | 0.70 |
| 96  | diacylglycerol                   | DG(16:0_18:1)                  | 0.64 | 0.39 | 1.03  | 6.66E-02 | 1.2E-05 | 0.51 |
| 97  | monohexosylceramide              | HexCer(d18:2/18:0)             | 2.04 | 0.94 | 4.40  | 6.72E-02 | 1.7E-01 | 1.23 |
| 98  | ceramide                         | Cer(d20:1/23:0)                | 2.78 | 0.88 | 8.76  | 6.76E-02 | 8.7E-01 | 1.02 |
| 99  | sphingomyelin                    | SM(d18:1/16:0)                 | 4.22 | 0.88 | 20.25 | 6.97E-02 | 2.7E-08 | 1.42 |
| 100 | ceramide                         | Cer(d18:1/20:0)                | 3.59 | 0.90 | 14.35 | 7.11E-02 | 1.5E-01 | 1.14 |
| 101 | phosphatidylethanolamine         | PE(16:1_20:4)                  | 0.66 | 0.43 | 1.02  | 7.13E-02 | 7.7E-02 | 0.57 |
| 102 | acylcarnitine                    | AC(17:0)                       | 2.18 | 0.96 | 4.96  | 7.38E-02 | 2.0E-02 | 1.61 |
| 103 | phosphatidylinositol             | PI(16:0/16:0)                  | 0.67 | 0.43 | 1.04  | 7.52E-02 | 1.3E-01 | 0.67 |
| 104 | phosphatidylethanolamine         | PE(18:0_22:5) (n3)             | 0.58 | 0.31 | 1.07  | 7.54E-02 | 2.2E-02 | 0.66 |
| 105 | monoalkyl diacylglycerol         | TG(O-52:0) [NL-16:0]           | 0.78 | 0.59 | 1.04  | 7.72E-02 | 2.1E-07 | 0.17 |
| 106 | triacylglycerol                  | TG(51:0) [NL-16:0]             | 0.78 | 0.59 | 1.04  | 7.81E-02 | 2.0E-07 | 0.17 |
| 107 | deoxyceramide                    | Cer(m18:1/20:0)                | 0.68 | 0.44 | 1.04  | 8.00E-02 | 1.4E-02 | 0.58 |
| 108 | triacylglycerol                  | TG(50:0) [SIM]                 | 0.75 | 0.54 | 1.04  | 8.18E-02 | 2.2E-06 | 0.20 |
| 109 | diacylglycerol                   | DG(18:1_20:3)                  | 0.69 | 0.46 | 1.04  | 8.20E-02 | 4.5E-02 | 0.63 |
| 110 | sphingomyelin                    | SM(44:2)                       | 2.46 | 0.88 | 6.88  | 8.20E-02 | 3.8E-06 | 1.64 |
| 111 | ceramide                         | Cer(d18:1/16:0)                | 5.43 | 0.77 | 38.10 | 8.26E-02 | 2.1E-03 | 1.23 |
| 112 | triacylglycerol                  | TG(50:0) [NL-18:0]             | 0.77 | 0.57 | 1.04  | 8.58E-02 | 1.3E-05 | 0.19 |
| 113 | free fatty acid                  | FA(20:5)                       | 2.24 | 0.91 | 5.49  | 8.82E-02 | 8.6E-03 | 1.37 |
| 114 | alkenylphosphatidylcholine       | PC(P-16:0/14:0)                | 0.34 | 0.09 | 1.20  | 8.88E-02 | 2.8E-01 | 1.14 |
| 115 | triacylglycerol                  | TG(50:2) [NL-16:1]             | 0.59 | 0.33 | 1.06  | 8.92E-02 | 1.3E-03 | 0.59 |
| 116 | phosphatidylserine               | PS(36:1)                       | 2.72 | 0.87 | 8.50  | 8.92E-02 | 2.5E-01 | 1.10 |
| 117 | cholesterol ester                | CE(18:2)                       | 2.46 | 0.82 | 7.38  | 9.04E-02 | 2.0E-05 | 1.48 |
| 118 | triacylglycerol                  | TG(50:1) [SIM]                 | 0.50 | 0.22 | 1.13  | 9.05E-02 | 1.6E-05 | 0.59 |
| 119 | phosphatidylethanolamine         | PE(16:0_18:3) (b)              | 0.69 | 0.45 | 1.06  | 9.17E-02 | 6.3E-03 | 0.51 |
| 120 | cholesterol ester                | CE(20:4)                       | 2.58 | 0.81 | 8.22  | 9.23E-02 | 3.3E-04 | 1.35 |
| 121 | sphingomyelin                    | SM(d18:2/23:0)                 | 3.02 | 0.79 | 11.49 | 9.25E-02 | 1.5E-05 | 1.41 |
| 122 | cholesterol ester                | CE(20:0)                       | 0.61 | 0.34 | 1.07  | 9.42E-02 | 6.6E-02 | 0.76 |
| 123 | phosphatidylethanolamine         | PE(16:0_18:3) (a)              | 0.63 | 0.37 | 1.09  | 9.45E-02 | 1.3E-01 | 0.70 |
| 124 | sphingomyelin                    | SM(d18:1/24:1)                 | 2.35 | 0.84 | 6.53  | 9.52E-02 | 6.5E-07 | 1.64 |
| 125 | lysalkenylphosphatidylcholine    | LPC(P-20:0)                    | 2.03 | 0.88 | 4.71  | 9.70E-02 | 7.4E-02 | 1.19 |
| 126 | sphingomyelin                    | SM(43:2) (b)                   | 2.58 | 0.83 | 8.01  | 9.80E-02 | 2.5E-07 | 1.50 |
| 127 | monohexosylceramide              | HexCer(d18:1/16:0)             | 2.21 | 0.88 | 5.56  | 9.84E-02 | 9.2E-04 | 1.51 |
| 128 | phosphatidylethanolamine         | PE(18:0_22:4)                  | 0.68 | 0.43 | 1.07  | 9.97E-02 | 1.6E-02 | 0.58 |
| 129 | acylcarnitine                    | AC(18:2)                       | 1.69 | 0.91 | 3.13  | 1.01E-01 | 1.7E-03 | 1.87 |
| 130 | phosphatidylethanolamine         | PE(18:0_20:3) (a)              | 0.61 | 0.34 | 1.11  | 1.03E-01 | 4.0E-02 | 0.67 |
| 131 | phosphatidylcholine              | PC(16:0_18:3) (a)              | 0.36 | 0.10 | 1.29  | 1.03E-01 | 2.9E-01 | 0.91 |
| 132 | cholesterol ester                | CE(22:0)                       | 0.61 | 0.33 | 1.10  | 1.04E-01 | 1.0E-01 | 0.78 |
| 133 | ubiquinone                       | Ubiquinone                     | 2.10 | 0.91 | 4.87  | 1.07E-01 | 4.5E-01 | 1.13 |
| 134 | ceramide                         | Cer(d17:1/18:0)                | 1.81 | 0.85 | 3.83  | 1.09E-01 | 6.5E-02 | 1.26 |
| 135 | triacylglycerol                  | TG(50:3) [NL-18:3]             | 0.67 | 0.41 | 1.09  | 1.10E-01 | 7.3E-06 | 0.39 |
| 136 | cholesterol ester                | CE(24:0)                       | 0.60 | 0.32 | 1.11  | 1.12E-01 | 6.0E-01 | 0.93 |
| 137 | sphingomyelin                    | SM(d18:0/14:0)                 | 0.30 | 0.07 | 1.33  | 1.12E-01 | 8.1E-01 | 0.98 |
| 138 | triacylglycerol                  | TG(51:2) [SIM]                 | 0.66 | 0.40 | 1.09  | 1.13E-01 | 8.4E-04 | 0.58 |
| 139 | phosphatidylethanolamine         | PE(38:5) (b)                   | 0.56 | 0.28 | 1.15  | 1.13E-01 | 1.2E-01 | 0.79 |
| 140 | acylcarnitine                    | AC(16:1)                       | 1.76 | 0.87 | 3.55  | 1.14E-01 | 2.1E-04 | 2.00 |
| 141 | sphingomyelin                    | SM(44:3)                       | 2.27 | 0.79 | 6.49  | 1.14E-01 | 1.3E-06 | 1.65 |
| 142 | phosphatidylglycerol             | PG(36:1)                       | 0.65 | 0.38 | 1.12  | 1.14E-01 | 2.9E-03 | 0.60 |
| 143 | phosphatidylinositol-1-phosphate | PIP1(38:4)                     | 0.64 | 0.37 | 1.11  | 1.17E-01 | 7.2E-02 | 1.44 |
| 144 | acylcarnitine                    | AC(12:0)                       | 1.54 | 0.89 | 2.64  | 1.18E-01 | 1.4E-04 | 2.19 |
| 145 | sphingomyelin                    | SM(d18:1/14:0)/SM(d16:1/16:0)  | 0.24 | 0.04 | 1.43  | 1.21E-01 | 8.1E-01 | 1.02 |
| 146 | deoxyceramide                    | Cer(m18:0/24:1)                | 0.69 | 0.43 | 1.10  | 1.25E-01 | 4.9E-03 | 0.63 |
| 147 | phosphatidylinositol             | PI(16:0_20:3) (b)              | 0.59 | 0.31 | 1.15  | 1.26E-01 | 6.5E-02 | 0.70 |
| 148 | triacylglycerol                  | TG(54:3) [NL-18:1]             | 1.65 | 0.87 | 3.11  | 1.26E-01 | 1.9E-02 | 1.53 |
| 149 | phosphatidylcholine              | PC(31:0) (a)                   | 0.59 | 0.30 | 1.16  | 1.27E-01 | 2.0E-02 | 0.68 |
| 150 | demosterol                       | DE(20:4)                       | 1.83 | 0.82 | 4.11  | 1.28E-01 | 6.2E-03 | 1.40 |
| 151 | triacylglycerol                  | TG(54:6) [NL-22:6]             | 0.63 | 0.35 | 1.15  | 1.28E-01 | 4.0E-02 | 0.61 |
| 152 | phosphatidylcholine              | PC(18:0_20:3)                  | 0.53 | 0.24 | 1.19  | 1.29E-01 | 1.1E-01 | 0.78 |
| 153 | lysophosphatidylcholine          | LPC(20:4) [+OH]                | 1.72 | 0.86 | 3.43  | 1.29E-01 | 8.3E-01 | 1.03 |
| 154 | diacylglycerol                   | DG(16:0_22:6)                  | 0.67 | 0.40 | 1.13  | 1.31E-01 | 2.5E-02 | 0.60 |
| 155 | triacylglycerol                  | TG(50:1) [NL-16:0]             | 0.56 | 0.26 | 1.21  | 1.32E-01 | 8.1E-06 | 0.55 |
| 156 | lysophosphatidylcholine          | LPE(17:0) [sn2]                | 2.23 | 0.78 | 6.42  | 1.33E-01 | 2.3E-02 | 1.20 |
| 157 | lysophosphatidylcholine          | LPC(15-MHDA) [sn1] / LPC(17:0) | 2.68 | 0.72 | 9.88  | 1.35E-01 | 8.8E-01 | 0.98 |
| 158 | dihexosylceramide                | Hex2Cer(d18:1/18:0)            | 2.17 | 0.78 | 6.03  | 1.36E-01 | 5.0E-04 | 1.48 |
| 159 | sphingomyelin                    | SM(d17:1/24:1)                 | 2.56 | 0.75 | 8.77  | 1.36E-01 | 1.6E-07 | 1.49 |

|     |                                 |                      |      |      |       |          |         |      |
|-----|---------------------------------|----------------------|------|------|-------|----------|---------|------|
| 160 | phosphatidylethanolamine        | PE(18:0_22:5) (n6)   | 0.74 | 0.50 | 1.09  | 1.37E-01 | 2.0E-02 | 0.58 |
| 161 | sphingomyelin                   | SM(40:3) (b)         | 2.49 | 0.73 | 8.44  | 1.38E-01 | 4.4E-04 | 1.44 |
| 162 | lysophosphatidylcholine         | LPC(17:0) [sn1]      | 2.57 | 0.72 | 9.19  | 1.38E-01 | 8.8E-01 | 1.02 |
| 163 | ceramide                        | Cer(d18:2/20:0)      | 1.93 | 0.82 | 4.56  | 1.39E-01 | 4.6E-01 | 1.09 |
| 164 | triacylglycerol                 | TG(54:5) [SIM]       | 1.81 | 0.83 | 3.94  | 1.41E-01 | 1.9E-01 | 1.20 |
| 165 | phosphatidylethanolamine        | PE(16:1_18:2)        | 0.70 | 0.44 | 1.12  | 1.42E-01 | 9.5E-02 | 0.60 |
| 166 | phosphatidylglycerol            | PG(34:1)             | 0.62 | 0.32 | 1.18  | 1.44E-01 | 4.7E-02 | 0.76 |
| 167 | triacylglycerol                 | TG(56:7) [NL-20:4]   | 1.85 | 0.82 | 4.15  | 1.45E-01 | 6.6E-03 | 1.36 |
| 168 | phosphatidylserine              | PS(36:2)             | 2.11 | 0.76 | 5.82  | 1.46E-01 | 1.0E-01 | 1.22 |
| 169 | phosphatidylethanolamine        | PE(20:0_20:4)        | 0.61 | 0.32 | 1.18  | 1.46E-01 | 2.8E-01 | 0.82 |
| 170 | alkenylphosphatidylethanolamine | PE(P-18:0/18:1)      | 2.26 | 0.76 | 6.69  | 1.46E-01 | 7.5E-01 | 1.03 |
| 171 | phosphatidylethanolamine        | PE(16:0_18:2)        | 0.62 | 0.33 | 1.18  | 1.47E-01 | 2.2E-01 | 0.80 |
| 172 | ceramide                        | Cer(d19:1/22:0)      | 1.70 | 0.81 | 3.58  | 1.48E-01 | 7.2E-01 | 0.94 |
| 173 | sphingomyelin                   | SM(35:2) (b)         | 2.64 | 0.70 | 9.97  | 1.48E-01 | 8.4E-05 | 1.43 |
| 174 | diacylglycerol                  | DG(16:0_18:2)        | 0.65 | 0.36 | 1.17  | 1.50E-01 | 2.2E-03 | 0.62 |
| 175 | diacylglycerol                  | DG(18:0_18:1)        | 0.71 | 0.44 | 1.13  | 1.50E-01 | 2.0E-04 | 0.53 |
| 176 | phosphatidic acid               | PA(34:1)             | 0.53 | 0.22 | 1.26  | 1.51E-01 | 4.7E-01 | 1.12 |
| 177 | acylcarnitine                   | AC(16:0)             | 2.45 | 0.77 | 7.78  | 1.52E-01 | 4.7E-02 | 1.36 |
| 178 | lysoalkenylphosphatidylcholine  | LPC(P-18:1)          | 2.41 | 0.73 | 7.88  | 1.52E-01 | 9.0E-02 | 1.13 |
| 179 | alkenylphosphatidylethanolamine | PE(P-18:1/18:1) (a)  | 1.84 | 0.81 | 4.16  | 1.52E-01 | 2.1E-01 | 1.18 |
| 180 | lysophosphatidylcholine         | LPE(17:0) [sn1]      | 1.73 | 0.80 | 3.75  | 1.53E-01 | 1.2E-01 | 1.21 |
| 181 | diacylglycerol                  | DG(16:0_22:5)        | 0.67 | 0.39 | 1.17  | 1.53E-01 | 2.5E-03 | 0.60 |
| 182 | phosphatidylethanolamine        | PE(16:0_18:1)        | 0.67 | 0.40 | 1.13  | 1.53E-01 | 6.6E-02 | 0.71 |
| 183 | phosphatidylethanolamine        | PE(18:0_18:2)        | 0.63 | 0.33 | 1.19  | 1.55E-01 | 2.5E-02 | 0.70 |
| 184 | sphingomyelin                   | SM(43:2) (c)         | 2.72 | 0.65 | 11.33 | 1.55E-01 | 5.9E-06 | 1.42 |
| 185 | sphingosine                     | Sph(d16:1)           | 2.65 | 0.67 | 10.45 | 1.56E-01 | 1.3E-03 | 1.28 |
| 186 | phosphatidylcholine             | PC(34:2) [+OH]       | 0.58 | 0.27 | 1.25  | 1.58E-01 | 1.9E-02 | 0.74 |
| 187 | ceramide                        | Cer(d19:1/23:0)      | 1.72 | 0.78 | 3.78  | 1.60E-01 | 9.4E-01 | 0.99 |
| 188 | phosphatidylcholine             | PC(33:0) (b)         | 2.48 | 0.69 | 8.91  | 1.62E-01 | 2.4E-03 | 1.27 |
| 189 | deoxyceramide                   | Cer(m18:1/18:0)      | 0.75 | 0.50 | 1.12  | 1.62E-01 | 3.7E-02 | 0.58 |
| 190 | ceramide                        | Cer(d18:1/21:0)      | 2.00 | 0.75 | 5.34  | 1.63E-01 | 2.0E-01 | 1.19 |
| 191 | phosphatidylcholine             | PC(16:0_20:3) (b)    | 0.61 | 0.30 | 1.23  | 1.63E-01 | 5.2E-01 | 0.88 |
| 192 | monohexosylceramide             | HexCer(d18:1/20:0)   | 1.92 | 0.77 | 4.81  | 1.64E-01 | 3.5E-03 | 1.40 |
| 193 | alkenylphosphatidylethanolamine | PE(P-18:1/18:1)      | 2.02 | 0.76 | 5.34  | 1.65E-01 | 3.9E-01 | 1.10 |
| 194 | cholesterol ester               | CE(22:5) (n3)        | 1.91 | 0.75 | 4.87  | 1.65E-01 | 1.2E-03 | 1.38 |
| 195 | diacylglycerol                  | DG(18:0_18:2)        | 0.70 | 0.42 | 1.17  | 1.66E-01 | 4.4E-04 | 0.54 |
| 196 | phosphatidylinositol            | PI(17:0_18:2)        | 0.55 | 0.24 | 1.28  | 1.68E-01 | 1.8E-01 | 0.83 |
| 197 | triacylglycerol                 | TG(54:4) [NL-20:3]   | 0.68 | 0.40 | 1.16  | 1.68E-01 | 2.2E-02 | 0.67 |
| 198 | triacylglycerol                 | TG(56:9) [NL-22:6]   | 0.73 | 0.47 | 1.14  | 1.72E-01 | 1.8E-01 | 0.70 |
| 199 | phosphatidylcholine             | PC(16:0_16:0)        | 0.36 | 0.08 | 1.55  | 1.72E-01 | 3.6E-01 | 1.07 |
| 200 | phosphatidylcholine             | PC(14:0_20:4)        | 0.61 | 0.31 | 1.22  | 1.73E-01 | 1.7E-03 | 0.58 |
| 201 | acylcarnitine                   | AC(18:1)             | 1.95 | 0.76 | 5.02  | 1.73E-01 | 1.2E-03 | 1.68 |
| 202 | phosphatidylcholine             | PC(16:0_20:3) (a)    | 0.42 | 0.13 | 1.39  | 1.74E-01 | 5.8E-01 | 0.94 |
| 203 | phosphatidylinositol            | PI(16:0_20:3) (a)    | 0.52 | 0.21 | 1.33  | 1.75E-01 | 2.6E-01 | 0.85 |
| 204 | phosphatidylethanolamine        | PE(16:0_20:3)        | 0.62 | 0.31 | 1.24  | 1.77E-01 | 2.5E-01 | 0.83 |
| 205 | phosphatidylethanolamine        | PE(36:0)             | 1.17 | 0.93 | 1.46  | 1.80E-01 | 1.2E-02 | 4.18 |
| 206 | phosphatidylcholine             | PC(18:1_22:6) (a)    | 1.65 | 0.80 | 3.41  | 1.82E-01 | 2.2E-02 | 1.40 |
| 207 | diacylglycerol                  | DG(18:1_22:5)        | 0.68 | 0.39 | 1.20  | 1.84E-01 | 2.2E-01 | 0.83 |
| 208 | triacylglycerol                 | TG(52:1) [SIM]       | 0.76 | 0.51 | 1.14  | 1.84E-01 | 2.2E-05 | 0.38 |
| 209 | lysophosphatidylcholine         | LPC(22:6) [+OH]      | 2.02 | 0.72 | 5.60  | 1.84E-01 | 6.7E-03 | 1.33 |
| 210 | triacylglycerol                 | TG(50:2) [SIM]       | 0.51 | 0.19 | 1.42  | 1.93E-01 | 4.1E-04 | 0.70 |
| 211 | triacylglycerol                 | TG(52:1) [NL-18:0]   | 0.78 | 0.55 | 1.13  | 1.93E-01 | 2.5E-05 | 0.33 |
| 212 | phosphatidylcholine             | PC(39:5)(b)          | 2.25 | 0.67 | 7.61  | 1.94E-01 | 2.0E-01 | 1.14 |
| 213 | triacylglycerol                 | TG(54:4) [NL-18:2]   | 1.48 | 0.82 | 2.65  | 1.95E-01 | 8.4E-02 | 1.40 |
| 214 | diacylglycerol                  | DG(18:2_20:4)        | 0.81 | 0.59 | 1.12  | 1.95E-01 | 2.7E-02 | 0.57 |
| 215 | phosphatidylethanolamine        | PE(16:0_20:4)        | 0.65 | 0.34 | 1.23  | 1.95E-01 | 6.0E-01 | 0.93 |
| 216 | ceramide                        | Cer(d18:2/21:0)      | 1.27 | 0.88 | 1.83  | 1.95E-01 | 5.1E-01 | 1.24 |
| 217 | sphingomyelin                   | SM(d17:1/16:0)       | 2.81 | 0.58 | 13.66 | 1.99E-01 | 5.2E-04 | 1.30 |
| 218 | diacylglycerol                  | DG(18:1_18:1)        | 0.71 | 0.42 | 1.19  | 1.99E-01 | 8.2E-02 | 0.76 |
| 219 | triacylglycerol                 | TG(50:1) [NL-18:1]   | 0.59 | 0.25 | 1.36  | 2.00E-01 | 5.0E-05 | 0.60 |
| 220 | diacylglycerol                  | DG(18:1_20:4)        | 0.67 | 0.36 | 1.24  | 2.01E-01 | 1.2E-02 | 0.76 |
| 221 | lysophosphatidylcholine         | LPE(P-18:0)          | 2.20 | 0.67 | 7.27  | 2.02E-01 | 5.5E-01 | 0.97 |
| 222 | monoalkyldiacylglycerol         | TG(O-52:1) [NL-16:0] | 0.70 | 0.40 | 1.24  | 2.03E-01 | 8.3E-06 | 0.48 |
| 223 | phosphatidylcholine             | PC(16:0_20:4)        | 2.19 | 0.66 | 7.27  | 2.03E-01 | 3.1E-03 | 1.28 |
| 224 | phosphatidylcholine             | PC(18:0_18:1)        | 0.44 | 0.12 | 1.60  | 2.05E-01 | 6.1E-01 | 0.96 |
| 225 | ceramide                        | Cer(d18:2/17:0)      | 1.35 | 0.83 | 2.20  | 2.08E-01 | 8.7E-03 | 1.90 |
| 226 | free fatty acid                 | FA(18:3)             | 1.52 | 0.80 | 2.87  | 2.08E-01 | 5.0E-04 | 1.89 |
| 227 | alkenylphosphatidylethanolamine | PE(P-16:0/18:1)      | 2.19 | 0.66 | 7.27  | 2.08E-01 | 6.0E-01 | 1.05 |
| 228 | triacylglycerol                 | TG(54:7) [NL-20:5]   | 0.73 | 0.46 | 1.18  | 2.09E-01 | 8.9E-03 | 0.60 |
| 229 | trihexosylceramide              | Hex3Cer(d18:1/20:0)  | 1.75 | 0.73 | 4.17  | 2.09E-01 | 3.4E-02 | 1.34 |
| 230 | ceramide                        | Cer(d20:1/26:0)      | 1.09 | 0.95 | 1.26  | 2.10E-01 | 1.3E-02 | 6.04 |
| 231 | acylcarnitine                   | AC(14:0)             | 1.60 | 0.77 | 3.33  | 2.13E-01 | 9.2E-03 | 1.64 |
| 232 | sphingomyelin                   | SM(44:1)             | 2.24 | 0.61 | 8.14  | 2.14E-01 | 3.1E-04 | 1.33 |
| 233 | alkenylphosphatidylcholine      | PC(P-18:1/18:1)      | 1.52 | 0.79 | 2.92  | 2.14E-01 | 6.4E-04 | 1.79 |
| 234 | cholesterol ester               | CE(16:2)             | 1.64 | 0.74 | 3.66  | 2.16E-01 | 2.1E-02 | 1.32 |
| 235 | demosterol                      | DE(22:6)             | 1.46 | 0.80 | 2.67  | 2.16E-01 | 3.1E-02 | 1.39 |
| 236 | lysophosphatidylcholine         | LPC(17:1) [sn1] (b)  | 0.31 | 0.06 | 1.74  | 2.17E-01 | 1.6E-01 | 0.89 |
| 237 | ceramide                        | Cer(d18:2/24:1)      | 1.85 | 0.69 | 4.93  | 2.18E-01 | 2.0E-01 | 1.15 |
| 238 | triacylglycerol                 | TG(56:7) [NL-20:5]   | 1.56 | 0.77 | 3.15  | 2.19E-01 | 3.6E-01 | 1.22 |
| 239 | lysophosphatidylcholine         | LPC(15-MHDA) [sn2]   | 2.18 | 0.62 | 7.69  | 2.20E-01 | 8.0E-01 | 0.97 |
| 240 | ceramide                        | Cer(d20:1/22:0)      | 1.66 | 0.72 | 3.83  | 2.22E-01 | 8.5E-01 | 0.97 |
| 241 | triacylglycerol                 | TG(51:1) [SIM]       | 0.78 | 0.52 | 1.17  | 2.29E-01 | 4.8E-06 | 0.40 |

|     |                                 |                                 |      |      |       |          |         |      |
|-----|---------------------------------|---------------------------------|------|------|-------|----------|---------|------|
| 242 | lysophosphatidylcholine         | LPC(16:1) [sn2]                 | 0.64 | 0.31 | 1.31  | 2.30E-01 | 1.3E-01 | 0.74 |
| 243 | phosphatidylethanolamine        | PE(18:0_20:4)                   | 0.65 | 0.33 | 1.29  | 2.31E-01 | 3.7E-01 | 0.90 |
| 244 | triacylglycerol                 | TG(50:2) [NL-14:0]              | 0.72 | 0.41 | 1.25  | 2.31E-01 | 1.2E-02 | 0.55 |
| 245 | phosphatidylcholine             | PC(18:0_22:5) (n6)              | 0.70 | 0.40 | 1.23  | 2.31E-01 | 1.5E-01 | 0.75 |
| 246 | phosphatidylcholine             | PC(18:1_18:2)                   | 1.65 | 0.74 | 3.69  | 2.31E-01 | 1.4E-03 | 1.48 |
| 247 | monohexosylceramide             | HexCer(d16:1/20:0)              | 1.65 | 0.72 | 3.76  | 2.32E-01 | 5.6E-01 | 1.08 |
| 248 | phosphatidylethanolamine        | PE(16:0_20:5)                   | 0.71 | 0.40 | 1.25  | 2.33E-01 | 3.2E-01 | 0.82 |
| 249 | phosphatidylinositol            | PI(36:2)                        | 0.53 | 0.19 | 1.53  | 2.33E-01 | 8.8E-01 | 1.02 |
| 250 | triacylglycerol                 | TG(52:5) [NL-20:5]              | 0.75 | 0.48 | 1.19  | 2.34E-01 | 1.5E-03 | 0.47 |
| 251 | phosphatidylinositol            | PI(34:0)                        | 0.70 | 0.38 | 1.27  | 2.35E-01 | 9.6E-01 | 0.99 |
| 252 | phosphatidylcholine             | PC(16:0_18:2)                   | 2.93 | 0.49 | 17.66 | 2.37E-01 | 2.1E-04 | 1.25 |
| 253 | triacylglycerol                 | TG(56:6) [SIM]                  | 1.78 | 0.68 | 4.65  | 2.37E-01 | 1.6E-03 | 1.39 |
| 254 | cholesterol ester               | CE(18:3)                        | 1.51 | 0.75 | 3.04  | 2.41E-01 | 2.1E-02 | 1.36 |
| 255 | phosphatidylcholine             | PC(14:0_22:6)                   | 0.65 | 0.32 | 1.31  | 2.41E-01 | 2.6E-02 | 0.68 |
| 256 | ceramide                        | Cer(d18:1/17:0)                 | 1.48 | 0.76 | 2.88  | 2.44E-01 | 1.3E-02 | 1.50 |
| 257 | sphingomyelin                   | SM(34:3)                        | 2.68 | 0.50 | 14.41 | 2.47E-01 | 6.0E-02 | 1.20 |
| 258 | ceramide                        | Cer(d18:1/26:0)                 | 1.77 | 0.67 | 4.65  | 2.47E-01 | 4.1E-02 | 1.28 |
| 259 | monoalkyldiacylglycerol         | TG(O-50:1) [NL-16:0]            | 0.70 | 0.37 | 1.32  | 2.52E-01 | 4.7E-04 | 0.56 |
| 260 | cholesterol ester               | CE(22:6)                        | 1.35 | 0.80 | 2.28  | 2.52E-01 | 2.1E-03 | 1.74 |
| 261 | phosphatidylethanolamine        | PE(18:0_18:1)                   | 0.74 | 0.44 | 1.23  | 2.55E-01 | 5.4E-02 | 0.66 |
| 262 | sphingomyelin                   | SM(40:3) (a)                    | 1.81 | 0.64 | 5.11  | 2.57E-01 | 1.2E-04 | 1.61 |
| 263 | lysoalkenylphosphatidylcholine  | LPC(P-17:0) (b)                 | 1.81 | 0.65 | 5.04  | 2.58E-01 | 7.7E-01 | 0.98 |
| 264 | phosphatidylcholine             | PC(38:5) (a)                    | 2.14 | 0.57 | 8.00  | 2.60E-01 | 2.2E-01 | 1.15 |
| 265 | ceramide                        | Cer(d16:1/24:0)                 | 0.70 | 0.38 | 1.30  | 2.61E-01 | 1.0E-02 | 0.60 |
| 266 | trihexosylceramide              | Hex3Cer(d18:1/16:0)             | 1.76 | 0.66 | 4.72  | 2.62E-01 | 1.2E-04 | 1.51 |
| 267 | lysophosphatidylinositol        | LPI(18:1) [sn1]                 | 1.39 | 0.78 | 2.47  | 2.62E-01 | 7.3E-02 | 1.38 |
| 268 | free fatty acid                 | FA(20:4)                        | 1.50 | 0.74 | 3.03  | 2.63E-01 | 7.2E-02 | 1.30 |
| 269 | ceramide                        | Cer(d16:1/22:0)                 | 0.71 | 0.39 | 1.30  | 2.64E-01 | 1.8E-02 | 0.61 |
| 270 | lysophosphatidylcholine         | LPC(22:1) [sn2]                 | 1.33 | 0.81 | 2.17  | 2.64E-01 | 1.4E-02 | 1.55 |
| 271 | phosphatidylcholine             | PC(16:0_18:3) (b)               | 0.63 | 0.28 | 1.42  | 2.65E-01 | 2.1E-02 | 0.71 |
| 272 | triacylglycerol                 | TG(58:8) [SIM]                  | 1.47 | 0.75 | 2.88  | 2.65E-01 | 5.5E-02 | 1.53 |
| 273 | cholesterol ester               | CE(20:4) [+OH]                  | 1.56 | 0.71 | 3.46  | 2.66E-01 | 5.4E-01 | 1.08 |
| 274 | lysophosphatidylcholine         | LPC(19:0) [sn1] (a) / LPC(19:0) | 2.29 | 0.52 | 10.15 | 2.68E-01 | 3.4E-01 | 1.08 |
| 275 | phosphatidylinositol            | PI(18:0_22:6)                   | 0.57 | 0.21 | 1.57  | 2.71E-01 | 1.9E-01 | 1.15 |
| 276 | sphingomyelin                   | SM(43:1)                        | 2.24 | 0.52 | 9.74  | 2.73E-01 | 4.9E-03 | 1.21 |
| 277 | ceramide                        | Cer(d17:1/24:1)                 | 1.74 | 0.64 | 4.72  | 2.74E-01 | 4.3E-01 | 1.10 |
| 278 | phosphatidylcholine             | PC(34:5)                        | 0.77 | 0.49 | 1.22  | 2.75E-01 | 4.4E-03 | 0.54 |
| 279 | alkylphosphatidylcholine        | PC(O-18:1/18:1)                 | 1.49 | 0.73 | 3.04  | 2.76E-01 | 2.2E-05 | 1.83 |
| 280 | triacylglycerol                 | TG(54:4) [SIM]                  | 1.59 | 0.69 | 3.69  | 2.78E-01 | 9.9E-02 | 1.26 |
| 281 | alkenylphosphatidylethanolamine | PE(P-18:0/22:4)                 | 1.73 | 0.63 | 4.80  | 2.80E-01 | 5.9E-01 | 1.08 |
| 282 | lysoalkenylphosphatidylcholine  | LPC(P-18:0)                     | 1.85 | 0.62 | 5.48  | 2.80E-01 | 9.6E-01 | 1.00 |
| 283 | GM3 ganglioside                 | GM3(d18:1/24:1)                 | 1.59 | 0.67 | 3.76  | 2.80E-01 | 2.0E-03 | 1.48 |
| 284 | phosphatidylserine              | PS(38:4)                        | 2.01 | 0.57 | 7.08  | 2.81E-01 | 4.2E-01 | 1.05 |
| 285 | diacylglycerol                  | DG(18:1_22:6)                   | 0.74 | 0.43 | 1.29  | 2.81E-01 | 7.5E-01 | 0.93 |
| 286 | lysoalkylphosphatidylcholine    | LPC(O-24:0)                     | 0.53 | 0.16 | 1.74  | 2.82E-01 | 9.7E-02 | 1.17 |
| 287 | cholesterol ester               | CE(20:5)                        | 1.36 | 0.78 | 2.35  | 2.84E-01 | 8.8E-03 | 1.52 |
| 288 | phosphatidylethanolamine        | PE(38:5) (a)                    | 0.68 | 0.34 | 1.36  | 2.84E-01 | 9.2E-01 | 0.98 |
| 289 | triacylglycerol                 | TG(51:1) [NL-17:0]              | 0.81 | 0.55 | 1.19  | 2.89E-01 | 1.1E-05 | 0.39 |
| 290 | free fatty acid                 | FA(22:6)                        | 1.33 | 0.79 | 2.25  | 2.92E-01 | 2.0E-02 | 1.68 |
| 291 | ceramide                        | Cer(d17:1/20:0)                 | 1.45 | 0.71 | 2.97  | 2.94E-01 | 2.2E-01 | 1.24 |
| 292 | diacylglycerol                  | DG(18:2_22:6)                   | 0.82 | 0.56 | 1.19  | 2.94E-01 | 8.4E-01 | 0.94 |
| 293 | alkenylphosphatidylethanolamine | PE(P-18:1/18:2) (a)             | 1.59 | 0.67 | 3.77  | 2.94E-01 | 8.7E-01 | 0.98 |
| 294 | lysophosphatidylcholine         | LPC(20:4) [sn2]                 | 1.91 | 0.56 | 6.47  | 2.95E-01 | 5.5E-01 | 1.07 |
| 295 | phosphatidylcholine             | PC(17:0_18:2)                   | 1.92 | 0.54 | 6.80  | 2.97E-01 | 1.7E-02 | 1.23 |
| 296 | triacylglycerol                 | TG(53:2) [NL-17:1]              | 0.82 | 0.57 | 1.19  | 2.98E-01 | 1.9E-04 | 0.45 |
| 297 | sulfatide                       | Sulfatide (d18:1/24:1(OH))      | 1.37 | 0.76 | 2.49  | 3.00E-01 | 2.4E-01 | 1.21 |
| 298 | triacylglycerol                 | TG(51:2) [NL-17:0]              | 0.80 | 0.53 | 1.20  | 3.02E-01 | 3.9E-04 | 0.50 |
| 299 | triacylglycerol                 | TG(51:2) [NL-17:1]              | 0.80 | 0.53 | 1.20  | 3.02E-01 | 3.9E-04 | 0.50 |
| 300 | triacylglycerol                 | TG(54:2) [NL-20:1]              | 0.77 | 0.47 | 1.26  | 3.02E-01 | 3.6E-02 | 0.70 |
| 301 | sphingomyelin                   | SM(d18:2/16:0)                  | 2.54 | 0.43 | 15.08 | 3.03E-01 | 1.1E-02 | 1.23 |
| 302 | lysophosphatidylcholine         | LPC(16:1) [sn1]                 | 0.65 | 0.29 | 1.44  | 3.03E-01 | 1.4E-01 | 0.78 |
| 303 | alkylphosphatidylcholine        | PC(O-18:1/18:2)                 | 1.60 | 0.66 | 3.85  | 3.04E-01 | 1.7E-03 | 1.44 |
| 304 | phosphatidylinositol            | PI(38:6)                        | 0.61 | 0.24 | 1.59  | 3.08E-01 | 8.4E-01 | 1.02 |
| 305 | lysophosphatidylcholine         | LPC(20:4) [sn1]                 | 1.72 | 0.60 | 4.92  | 3.09E-01 | 5.9E-01 | 1.07 |
| 306 | lysophosphatidylcholine         | LPC(18:2) [sn2]                 | 1.93 | 0.55 | 6.79  | 3.10E-01 | 4.7E-01 | 1.04 |
| 307 | sphingomyelin                   | SM(d18:0/22:0)                  | 0.68 | 0.32 | 1.43  | 3.10E-01 | 5.3E-01 | 0.90 |
| 308 | phosphatidylethanolamine        | PE(18:0_22:6)                   | 0.74 | 0.40 | 1.34  | 3.12E-01 | 2.9E-01 | 0.87 |
| 309 | triacylglycerol                 | TG(54:3) [SIM]                  | 1.47 | 0.70 | 3.11  | 3.13E-01 | 1.3E-01 | 1.29 |
| 310 | lysophosphatidylcholine         | LPC(20:1) [sn2]                 | 1.57 | 0.65 | 3.79  | 3.13E-01 | 2.3E-03 | 1.31 |
| 311 | sphingomyelin                   | SM(d18:0/16:0)                  | 1.61 | 0.64 | 4.10  | 3.14E-01 | 7.1E-05 | 1.59 |
| 312 | diacylglycerol                  | DG(18:0_22:6)                   | 1.37 | 0.74 | 2.54  | 3.15E-01 | 2.1E-02 | 1.45 |
| 313 | diacylglycerol                  | DG(18:1_18:3)                   | 0.74 | 0.41 | 1.35  | 3.21E-01 | 3.6E-02 | 0.73 |
| 314 | phosphatidylinositol            | PI(18:0_18:1)                   | 0.63 | 0.25 | 1.57  | 3.21E-01 | 9.3E-01 | 0.99 |
| 315 | monohexosylceramide             | HexCer(d18:1/24:1)              | 1.51 | 0.67 | 3.38  | 3.23E-01 | 2.8E-04 | 1.61 |
| 316 | monoalkyldiacylglycerol         | TG(O-50:1) [NL-17:1]            | 0.73 | 0.39 | 1.38  | 3.25E-01 | 1.3E-03 | 0.60 |
| 317 | cholesterol ester               | CE(15:0)                        | 1.50 | 0.65 | 3.47  | 3.26E-01 | 1.2E-03 | 1.47 |
| 318 | alkenylphosphatidylethanolamine | PE(P-15:0/22:6) (a)             | 0.73 | 0.39 | 1.37  | 3.29E-01 | 1.0E-01 | 0.75 |
| 319 | ceramide                        | Cer(d19:1/26:0)                 | 1.46 | 0.68 | 3.14  | 3.29E-01 | 1.6E-01 | 1.30 |
| 320 | alkenylphosphatidylcholine      | PC(P-35:2)(b)                   | 1.18 | 0.85 | 1.65  | 3.30E-01 | 2.7E-01 | 1.42 |
| 321 | phosphatidylcholine             | PC(39:5)(a)                     | 1.69 | 0.58 | 4.91  | 3.31E-01 | 6.9E-01 | 1.05 |
| 322 | monohexosylceramide             | HexCer(d16:1/18:0)              | 1.41 | 0.68 | 2.89  | 3.33E-01 | 8.1E-01 | 1.04 |
| 323 | phosphatidylethanolamine        | PE(16:0_22:6)                   | 0.75 | 0.42 | 1.35  | 3.34E-01 | 4.6E-01 | 1.10 |

|     |                                 |                               |      |      |       |          |         |      |
|-----|---------------------------------|-------------------------------|------|------|-------|----------|---------|------|
| 324 | free fatty acid                 | FA(22:4)                      | 1.40 | 0.72 | 2.74  | 3.34E-01 | 6.4E-03 | 1.54 |
| 325 | phosphatidylserine              | PS(40:5)                      | 2.04 | 0.47 | 8.85  | 3.37E-01 | 4.4E-01 | 1.07 |
| 326 | lysophosphatidylcholine         | LPC(18:2) [sn1]               | 1.94 | 0.51 | 7.31  | 3.37E-01 | 4.4E-01 | 1.05 |
| 327 | phosphatidylcholine             | PC(16:1_18:2)                 | 0.63 | 0.25 | 1.60  | 3.37E-01 | 7.3E-01 | 0.95 |
| 328 | triacylglycerol                 | TG(54:1) [NL-18:1]            | 0.88 | 0.68 | 1.15  | 3.42E-01 | 1.9E-04 | 0.24 |
| 329 | free fatty acid                 | FA(17:0)                      | 1.69 | 0.58 | 4.96  | 3.43E-01 | 5.8E-04 | 1.35 |
| 330 | phosphatidylcholine             | PC(18:0_22:4)                 | 0.66 | 0.28 | 1.56  | 3.45E-01 | 3.6E-01 | 0.87 |
| 331 | triacylglycerol                 | TG(52:2) [NL-16:0]            | 1.48 | 0.65 | 3.36  | 3.46E-01 | 2.4E-01 | 1.13 |
| 332 | phosphatidylcholine             | PC(16:0_18:0)                 | 0.37 | 0.05 | 2.94  | 3.47E-01 | 6.8E-01 | 1.02 |
| 333 | lysophosphatidylcholine         | LPC(15-MHDA) [sn1] [104_sn1]  | 1.57 | 0.60 | 4.10  | 3.51E-01 | 6.5E-01 | 0.94 |
| 334 | dihydroceramide                 | Cer(d18:0/24:0)               | 0.69 | 0.31 | 1.53  | 3.53E-01 | 8.1E-02 | 0.78 |
| 335 | cholesterol ester               | CE(22:4)                      | 1.46 | 0.64 | 3.36  | 3.53E-01 | 1.8E-03 | 1.45 |
| 336 | phosphatidylinositol            | PI(18:0_22:5) (n3)            | 0.61 | 0.22 | 1.72  | 3.53E-01 | 3.0E-01 | 0.89 |
| 337 | triacylglycerol                 | TG(58:10) [NL-22:6]           | 0.81 | 0.51 | 1.28  | 3.54E-01 | 6.5E-01 | 0.87 |
| 338 | diacylglycerol                  | DG(18:0_20:4)                 | 0.72 | 0.36 | 1.44  | 3.56E-01 | 3.9E-02 | 0.80 |
| 339 | lysophosphatidylcholine         | LPC(19:0) [sn2] (a)           | 1.72 | 0.54 | 5.45  | 3.57E-01 | 3.2E-01 | 1.08 |
| 340 | phosphatidylserine              | PS(38:3)                      | 1.67 | 0.56 | 4.99  | 3.59E-01 | 6.0E-01 | 1.04 |
| 341 | lysophosphatidylinositol        | LPI(18:2) [sn1]               | 0.76 | 0.42 | 1.37  | 3.59E-01 | 4.2E-01 | 1.15 |
| 342 | phosphatidylinositol            | PI(16:0_20:4)                 | 0.66 | 0.27 | 1.59  | 3.61E-01 | 5.9E-02 | 0.78 |
| 343 | lysophosphatidylcholine         | LPC(20:1) [sn1]               | 1.52 | 0.61 | 3.76  | 3.62E-01 | 3.0E-03 | 1.31 |
| 344 | free fatty acid                 | FA(22:5)                      | 1.35 | 0.72 | 2.53  | 3.62E-01 | 1.3E-02 | 1.51 |
| 345 | phosphatidylcholine             | PC(17:1_18:2)                 | 1.77 | 0.51 | 6.22  | 3.64E-01 | 2.1E-01 | 1.12 |
| 346 | alkenylphosphatidylethanolamine | PE(P-20:0/18:1)               | 1.46 | 0.64 | 3.32  | 3.66E-01 | 6.1E-02 | 1.28 |
| 347 | alkylphosphatidylcholine        | PC(O-16:0/22:6)               | 0.62 | 0.22 | 1.77  | 3.67E-01 | 9.3E-02 | 1.21 |
| 348 | cholesterol                     | COH                           | 2.40 | 0.36 | 15.93 | 3.68E-01 | 4.4E-06 | 1.26 |
| 349 | monoalkyldiacylglycerol         | TG(O-54:4) [NL-18:2]          | 1.39 | 0.68 | 2.86  | 3.74E-01 | 3.8E-01 | 1.13 |
| 350 | triacylglycerol                 | TG(56:7) [SIM]                | 1.47 | 0.63 | 3.45  | 3.76E-01 | 1.1E-01 | 1.26 |
| 351 | lysophosphatidylcholine         | LPC(22:1) [sn1]               | 1.26 | 0.76 | 2.07  | 3.76E-01 | 1.8E-02 | 1.48 |
| 352 | triacylglycerol                 | TG(54:5) [NL-18:3]            | 1.29 | 0.74 | 2.25  | 3.78E-01 | 4.8E-01 | 1.16 |
| 353 | alkenylphosphatidylcholine      | PC(P-18:0/18:2)               | 1.39 | 0.67 | 2.88  | 3.79E-01 | 1.2E-01 | 1.26 |
| 354 | phosphatidylcholine             | PC(17:0_20:4)                 | 1.49 | 0.61 | 3.60  | 3.81E-01 | 1.1E-01 | 1.22 |
| 355 | alkylphosphatidylcholine        | PC(O-32:2)                    | 1.37 | 0.68 | 2.76  | 3.81E-01 | 5.0E-02 | 1.42 |
| 356 | free fatty acid                 | FA(20:2)                      | 1.53 | 0.59 | 4.01  | 3.86E-01 | 3.4E-05 | 1.53 |
| 357 | lysophosphatidylcholine         | LPC(19:1) (a)                 | 1.79 | 0.48 | 6.68  | 3.86E-01 | 5.7E-01 | 1.05 |
| 358 | alkenylphosphatidylethanolamine | PE(P-16:0/22:5) (n6)          | 0.69 | 0.30 | 1.60  | 3.90E-01 | 3.5E-01 | 0.86 |
| 359 | lysophosphatidylcholine         | LPC(18:2) [+OH]               | 1.41 | 0.66 | 3.00  | 3.90E-01 | 9.4E-01 | 1.01 |
| 360 | alkenylphosphatidylethanolamine | PE(P-15:0/20:4) (a)           | 0.83 | 0.54 | 1.27  | 3.90E-01 | 2.7E-04 | 0.51 |
| 361 | phosphatidylcholine             | PC(15-MHDA_18:2)              | 1.44 | 0.62 | 3.38  | 3.94E-01 | 8.6E-02 | 1.24 |
| 362 | triacylglycerol                 | TG(52:4) [NL-18:3]            | 0.65 | 0.24 | 1.76  | 3.99E-01 | 2.7E-02 | 0.79 |
| 363 | cholesterol ester               | CE(18:0)                      | 0.60 | 0.18 | 1.98  | 4.00E-01 | 2.1E-01 | 0.90 |
| 364 | ceramide                        | Cer(d16:1/23:0)               | 0.78 | 0.43 | 1.40  | 4.02E-01 | 3.8E-02 | 0.63 |
| 365 | lysophosphatidylcholine         | LPE(20:4) [sn1]               | 1.45 | 0.61 | 3.44  | 4.02E-01 | 9.1E-01 | 1.02 |
| 366 | phosphatidylethanolamine        | PE(18:1_22:6) (b)             | 0.80 | 0.47 | 1.37  | 4.03E-01 | 6.8E-01 | 1.07 |
| 367 | monoalkyldiacylglycerol         | TG(O-50:1) [NL-15:0]          | 0.73 | 0.33 | 1.57  | 4.04E-01 | 5.1E-02 | 0.77 |
| 368 | lysoalkylphosphatidylcholine    | LPC(O-18:1)                   | 1.70 | 0.47 | 6.13  | 4.06E-01 | 3.4E-03 | 1.23 |
| 369 | lysophosphatidylcholine         | LPC(19:0) (a) [sn1] [104_sn1] | 1.45 | 0.59 | 3.58  | 4.07E-01 | 5.7E-01 | 1.07 |
| 370 | triacylglycerol                 | TG(54:1) [SIM]                | 0.89 | 0.66 | 1.18  | 4.07E-01 | 3.0E-04 | 0.29 |
| 371 | triacylglycerol                 | TG(56:8) [NL-22:6]            | 0.80 | 0.47 | 1.36  | 4.08E-01 | 9.0E-01 | 0.97 |
| 372 | cholesterol ester               | CE(17:1)                      | 1.38 | 0.63 | 3.00  | 4.08E-01 | 7.7E-03 | 1.43 |
| 373 | ceramide                        | Cer(d20:1/24:0)               | 1.47 | 0.60 | 3.60  | 4.08E-01 | 7.4E-01 | 0.95 |
| 374 | sphingosine-1-phosphate         | S1P(d18:1)                    | 1.69 | 0.49 | 5.79  | 4.09E-01 | 3.3E-02 | 1.18 |
| 375 | monohexosylceramide             | HexCer(d16:1/24:0)            | 0.74 | 0.36 | 1.52  | 4.09E-01 | 9.0E-01 | 0.98 |
| 376 | triacylglycerol                 | TG(51:0) [SIM]                | 1.85 | 0.42 | 8.07  | 4.10E-01 | 4.8E-02 | 1.18 |
| 377 | monoalkyldiacylglycerol         | TG(O-52:0) [SIM]              | 1.85 | 0.42 | 8.07  | 4.10E-01 | 4.8E-02 | 1.18 |
| 378 | triacylglycerol                 | TG(52:4) [NL-16:1]            | 1.40 | 0.63 | 3.10  | 4.12E-01 | 2.7E-01 | 1.19 |
| 379 | sphingomyelin                   | SM(d18:1/23:0)/SM(d17:1/22:0) | 1.77 | 0.44 | 7.16  | 4.13E-01 | 2.8E-03 | 1.25 |
| 380 | phosphatidylethanolamine        | PE(15-MHDA_18:1)              | 0.79 | 0.45 | 1.38  | 4.15E-01 | 1.3E-01 | 0.77 |
| 381 | lysophosphatidylcholine         | LPE(18:1) [sn2]               | 1.32 | 0.67 | 2.59  | 4.17E-01 | 6.8E-01 | 0.93 |
| 382 | cholesterol ester               | CE(22:5) (n6)                 | 1.35 | 0.64 | 2.85  | 4.19E-01 | 6.1E-02 | 1.30 |
| 383 | phosphatidylethanolamine        | PE(18:0_20:3) (b)             | 0.77 | 0.41 | 1.46  | 4.21E-01 | 2.9E-01 | 1.18 |
| 384 | alkenylphosphatidylethanolamine | PE(P-18:1/22:5) (a)           | 1.54 | 0.55 | 4.31  | 4.23E-01 | 6.6E-01 | 1.04 |
| 385 | alkenylphosphatidylcholine      | PC(P-16:0/18:3)               | 1.36 | 0.64 | 2.88  | 4.24E-01 | 4.3E-01 | 1.13 |
| 386 | diacylglycerol                  | DG(18:1_18:2)                 | 0.78 | 0.42 | 1.44  | 4.25E-01 | 4.8E-01 | 0.90 |
| 387 | lysophosphatidylcholine         | LPE(18:1) [sn1]               | 1.32 | 0.67 | 2.60  | 4.25E-01 | 8.5E-01 | 0.97 |
| 388 | alkylphosphatidylethanolamine   | PE(O-16:0/18:2)               | 1.36 | 0.63 | 2.94  | 4.28E-01 | 6.8E-01 | 1.07 |
| 389 | ceramide                        | Cer(d19:1/24:0)               | 1.44 | 0.58 | 3.57  | 4.28E-01 | 5.5E-01 | 0.93 |
| 390 | monoalkyldiacylglycerol         | TG(O-52:2) [NL-16:0]          | 0.77 | 0.39 | 1.50  | 4.30E-01 | 7.5E-03 | 0.66 |
| 391 | alkylphosphatidylcholine        | PC(O-34:2)                    | 1.35 | 0.65 | 2.81  | 4.31E-01 | 3.9E-02 | 1.37 |
| 392 | sphingomyelin                   | SM(41:1) (a)                  | 1.39 | 0.60 | 3.23  | 4.33E-01 | 2.0E-01 | 1.17 |
| 393 | phosphatidylethanolamine        | PE(16:0_16:0)                 | 0.79 | 0.43 | 1.44  | 4.37E-01 | 3.5E-02 | 0.72 |
| 394 | phosphatidylcholine             | PC(18:0_18:2)                 | 2.16 | 0.31 | 15.27 | 4.37E-01 | 1.1E-03 | 1.18 |
| 395 | lysophosphatidylcholine         | LPE(P-18:1)                   | 1.41 | 0.60 | 3.33  | 4.39E-01 | 8.4E-01 | 1.02 |
| 396 | monoalkyldiacylglycerol         | TG(O-54:3) [NL-17:1]          | 1.38 | 0.62 | 3.05  | 4.42E-01 | 2.3E-01 | 0.87 |
| 397 | phosphatidylcholine             | PC(18:1_22:6) (b)             | 1.28 | 0.68 | 2.42  | 4.43E-01 | 3.5E-01 | 1.22 |
| 398 | alkenylphosphatidylethanolamine | PE(P-18:1/22:6) (b)           | 0.69 | 0.27 | 1.77  | 4.44E-01 | 7.6E-01 | 0.96 |
| 399 | phosphatidylcholine             | PC(38:5) (b)                  | 0.60 | 0.17 | 2.19  | 4.44E-01 | 7.4E-01 | 0.97 |
| 400 | triacylglycerol                 | TG(51:2) [NL-15:0]            | 0.85 | 0.56 | 1.29  | 4.44E-01 | 3.2E-01 | 0.76 |
| 401 | lysophosphatidylcholine         | LPC(20:2) [sn1]               | 1.61 | 0.47 | 5.48  | 4.47E-01 | 4.9E-01 | 1.06 |
| 402 | diacylglycerol                  | DG(18:1_20:5)                 | 0.89 | 0.66 | 1.20  | 4.51E-01 | 2.3E-01 | 0.63 |
| 403 | lysophosphatidylcholine         | LPC(20:2) [sn2]               | 1.51 | 0.51 | 4.47  | 4.52E-01 | 8.4E-01 | 1.02 |
| 404 | trihexosylceramide              | Hex3Cer(d18:1/18:0)           | 0.71 | 0.29 | 1.73  | 4.54E-01 | 1.1E-02 | 1.31 |
| 405 | alkenylphosphatidylcholine      | PC(P-16:0/18:0)               | 1.51 | 0.52 | 4.42  | 4.57E-01 | 7.6E-03 | 1.35 |

|     |                                 |                     |      |      |       |          |         |      |
|-----|---------------------------------|---------------------|------|------|-------|----------|---------|------|
| 406 | triacylglycerol                 | TG(50:3) [NL-14:1]  | 0.83 | 0.51 | 1.36  | 4.58E-01 | 1.7E-02 | 0.60 |
| 407 | lysophosphatidylcholine         | LPC(19:1) (c)       | 1.91 | 0.34 | 10.91 | 4.59E-01 | 5.6E-01 | 1.04 |
| 408 | alkylphosphatidylcholine        | PC(O-16:0/16:0)     | 0.66 | 0.22 | 2.00  | 4.62E-01 | 1.9E-03 | 1.36 |
| 409 | triacylglycerol                 | TG(50:2) [NL-18:2]  | 0.74 | 0.33 | 1.65  | 4.64E-01 | 9.5E-04 | 0.68 |
| 410 | phosphatidylcholine             | PC(17:0_22:6)       | 1.34 | 0.62 | 2.90  | 4.64E-01 | 1.8E-01 | 1.26 |
| 411 | alkylphosphatidylcholine        | PC(O-16:0/20:4)     | 0.61 | 0.17 | 2.26  | 4.64E-01 | 1.4E-01 | 1.20 |
| 412 | triacylglycerol                 | TG(54:6) [NL-18:3]  | 1.15 | 0.80 | 1.65  | 4.66E-01 | 8.1E-01 | 0.93 |
| 413 | alkylphosphatidylcholine        | PC(O-18:0/20:4)     | 0.67 | 0.22 | 1.99  | 4.68E-01 | 4.3E-02 | 1.24 |
| 414 | alkylphosphatidylcholine        | PC(O-34:4)          | 0.76 | 0.34 | 1.68  | 4.69E-01 | 7.2E-01 | 1.06 |
| 415 | alkenylphosphatidylcholine      | PC(P-16:0/18:1)     | 1.49 | 0.51 | 4.38  | 4.70E-01 | 5.4E-03 | 1.37 |
| 416 | alkenylphosphatidylethanolamine | PE(P-18:0/18:3)     | 1.25 | 0.68 | 2.29  | 4.71E-01 | 6.8E-01 | 0.93 |
| 417 | triacylglycerol                 | TG(54:0) [NL-18:0]  | 0.91 | 0.71 | 1.17  | 4.72E-01 | 2.1E-04 | 0.22 |
| 418 | lysophosphatidylcholine         | LPC(24:0) [sn1]     | 0.70 | 0.26 | 1.90  | 4.72E-01 | 3.5E-01 | 1.08 |
| 419 | triacylglycerol                 | TG(54:0) [SIM]      | 0.89 | 0.63 | 1.24  | 4.73E-01 | 2.9E-04 | 0.34 |
| 420 | phosphatidylethanolamine        | PE(15-MHDA_20:4)    | 0.79 | 0.42 | 1.49  | 4.75E-01 | 4.8E-01 | 0.90 |
| 421 | GM3 ganglioside                 | GM3(d18:1/16:0)     | 1.47 | 0.51 | 4.22  | 4.76E-01 | 5.4E-04 | 1.45 |
| 422 | ceramide-1-phosphate            | Cer1P(d18:1/16:0)   | 1.23 | 0.69 | 2.19  | 4.76E-01 | 4.5E-02 | 1.37 |
| 423 | cholesterol ester               | CE(20:3)            | 1.40 | 0.54 | 3.64  | 4.83E-01 | 1.7E-03 | 1.42 |
| 424 | monoalkyl diacylglycerol        | TG(O-54:4) [SIM]    | 0.75 | 0.33 | 1.70  | 4.84E-01 | 1.0E-04 | 0.65 |
| 425 | triacylglycerol                 | TG(56:7) [NL-22:6]  | 0.77 | 0.36 | 1.62  | 4.85E-01 | 9.9E-01 | 1.00 |
| 426 | free fatty acid                 | FA(18:2)            | 1.18 | 0.74 | 1.88  | 4.85E-01 | 4.0E-04 | 2.40 |
| 427 | dihexosylceramide               | Hex2Cer(d18:2/16:0) | 0.71 | 0.27 | 1.86  | 4.88E-01 | 6.5E-02 | 1.29 |
| 428 | triacylglycerol                 | TG(54:7) [SIM]      | 0.86 | 0.56 | 1.33  | 4.88E-01 | 2.4E-02 | 0.61 |
| 429 | phosphatidylcholine             | PC(31:0) (b)        | 0.65 | 0.19 | 2.23  | 4.89E-01 | 8.3E-01 | 1.01 |
| 430 | triacylglycerol                 | TG(52:5) [SIM]      | 0.82 | 0.46 | 1.45  | 4.90E-01 | 1.5E-02 | 0.65 |
| 431 | phosphatidylethanolamine        | PE(15-MHDA_18:2)    | 0.84 | 0.52 | 1.36  | 4.91E-01 | 2.1E-01 | 0.72 |
| 432 | alkenylphosphatidylcholine      | PC(P-18:0/20:4)     | 1.41 | 0.52 | 3.78  | 4.92E-01 | 5.6E-01 | 1.08 |
| 433 | free fatty acid                 | FA(16:0)            | 1.36 | 0.57 | 3.23  | 4.93E-01 | 8.6E-03 | 1.41 |
| 434 | triacylglycerol                 | TG(52:5) [NL-18:3]  | 0.85 | 0.54 | 1.35  | 4.93E-01 | 1.6E-02 | 0.62 |
| 435 | monohexosylceramide             | HexCer(d16:1/22:0)  | 0.74 | 0.31 | 1.78  | 4.95E-01 | 6.5E-01 | 0.95 |
| 436 | phosphatidylinositol            | PI(18:0_20:3) (b)   | 0.77 | 0.36 | 1.64  | 4.97E-01 | 9.1E-01 | 0.98 |
| 437 | phosphatidylcholine             | PC(18:0_20:4)       | 1.59 | 0.42 | 6.00  | 4.98E-01 | 1.8E-01 | 1.14 |
| 438 | alkenylphosphatidylcholine      | PC(P-38:5) (a)      | 1.56 | 0.43 | 5.59  | 4.98E-01 | 3.2E-02 | 1.24 |
| 439 | demosterol                      | DE(18:2)            | 1.28 | 0.62 | 2.66  | 5.00E-01 | 1.5E-01 | 1.18 |
| 440 | sphingosine                     | Sph(d18:2)          | 1.59 | 0.40 | 6.29  | 5.03E-01 | 2.4E-03 | 1.27 |
| 441 | sphingosine-1-phosphate         | S1P(d16:1)          | 0.63 | 0.16 | 2.45  | 5.05E-01 | 3.4E-01 | 1.07 |
| 442 | free fatty acid                 | FA(16:1)            | 0.83 | 0.47 | 1.45  | 5.11E-01 | 5.5E-02 | 1.57 |
| 443 | triacylglycerol                 | TG(52:2) [NL-18:2]  | 0.85 | 0.52 | 1.38  | 5.12E-01 | 6.8E-05 | 0.45 |
| 444 | phosphatidylcholine             | PC(15-MHDA_22:6)    | 1.39 | 0.52 | 3.74  | 5.17E-01 | 1.5E-01 | 1.18 |
| 445 | lysoalkylphosphatidylcholine    | LPC(O-20:1)         | 0.69 | 0.22 | 2.14  | 5.21E-01 | 8.3E-02 | 1.17 |
| 446 | lysophosphatidylcholine         | LPE(16:0) [sn2]     | 0.76 | 0.33 | 1.73  | 5.21E-01 | 6.8E-02 | 0.77 |
| 447 | alkenylphosphatidylethanolamine | PE(P-15:0/22:6) (b) | 0.78 | 0.36 | 1.68  | 5.25E-01 | 5.3E-01 | 0.92 |
| 448 | triacylglycerol                 | TG(58:8) [NL-22:6]  | 1.16 | 0.74 | 1.80  | 5.26E-01 | 1.7E-01 | 1.64 |
| 449 | ceramide                        | Cer(d18:1/23:0)     | 1.48 | 0.43 | 5.07  | 5.29E-01 | 6.5E-01 | 0.95 |
| 450 | monohexosylceramide             | HexCer(d18:2/20:0)  | 1.29 | 0.58 | 2.88  | 5.29E-01 | 5.9E-02 | 1.27 |
| 451 | ceramide                        | Cer(d16:1/18:0)     | 1.19 | 0.69 | 2.04  | 5.29E-01 | 9.9E-01 | 1.00 |
| 452 | sphingosine-1-phosphate         | S1P(d18:2)          | 1.65 | 0.35 | 7.89  | 5.31E-01 | 5.4E-02 | 1.18 |
| 453 | alkenylphosphatidylcholine      | PC(P-17:0/20:4) (b) | 1.21 | 0.67 | 2.19  | 5.31E-01 | 4.2E-01 | 1.17 |
| 454 | cholesterol ester               | CE(22:6) [+OH]      | 0.72 | 0.25 | 2.03  | 5.31E-01 | 8.8E-01 | 1.02 |
| 455 | trihexosylceramide              | Hex3Cer(d18:1/24:1) | 1.26 | 0.60 | 2.66  | 5.35E-01 | 2.3E-04 | 1.62 |
| 456 | alkenylphosphatidylethanolamine | PE(P-18:0/20:3) (a) | 0.76 | 0.32 | 1.81  | 5.36E-01 | 1.6E-01 | 0.83 |
| 457 | triacylglycerol                 | TG(56:9) [SIM]      | 0.85 | 0.51 | 1.42  | 5.36E-01 | 1.5E-01 | 0.74 |
| 458 | alkylphosphatidylethanolamine   | PE(O-18:1/18:2)     | 1.24 | 0.63 | 2.46  | 5.37E-01 | 5.6E-01 | 1.11 |
| 459 | demosterol                      | DE(20:5)            | 1.17 | 0.71 | 1.95  | 5.38E-01 | 1.1E-01 | 1.35 |
| 460 | demosterol                      | DE(18:1)            | 1.40 | 0.47 | 4.16  | 5.38E-01 | 1.5E-02 | 1.23 |
| 461 | alkenylphosphatidylethanolamine | PE(P-18:1/20:4) (a) | 1.21 | 0.66 | 2.23  | 5.39E-01 | 1.8E-01 | 0.83 |
| 462 | lysophosphatidylcholine         | LPC(19:0) [sn1] (b) | 1.39 | 0.48 | 4.00  | 5.41E-01 | 6.4E-01 | 1.05 |
| 463 | triacylglycerol                 | TG(58:10) [SIM]     | 0.86 | 0.52 | 1.41  | 5.42E-01 | 4.4E-01 | 0.83 |
| 464 | phosphatidylethanolamine        | PE(17:0_18:2)       | 0.83 | 0.46 | 1.51  | 5.42E-01 | 3.0E-01 | 0.81 |
| 465 | alkylphosphatidylethanolamine   | PE(O-38:5) (b)      | 0.77 | 0.32 | 1.82  | 5.43E-01 | 5.9E-01 | 0.94 |
| 466 | triacylglycerol                 | TG(54:6) [NL-20:4]  | 0.81 | 0.42 | 1.57  | 5.44E-01 | 4.0E-02 | 0.75 |
| 467 | alkenylphosphatidylcholine      | PC(P-16:0/16:1)     | 0.75 | 0.29 | 1.94  | 5.46E-01 | 1.0E-01 | 1.29 |
| 468 | phosphatidylcholine             | PC(44:12)           | 1.15 | 0.73 | 1.81  | 5.48E-01 | 2.6E-01 | 1.39 |
| 469 | triacylglycerol                 | TG(52:4) [NL-18:2]  | 1.26 | 0.59 | 2.72  | 5.50E-01 | 1.6E-01 | 1.21 |
| 470 | phosphatidylcholine             | PC(36:4) [+OH]      | 1.23 | 0.63 | 2.40  | 5.52E-01 | 7.6E-03 | 1.54 |
| 471 | lysophosphatidylcholine         | LPC(26:0) [sn1]     | 0.76 | 0.31 | 1.89  | 5.55E-01 | 4.6E-01 | 1.11 |
| 472 | phosphatidylcholine             | PC(16:0_20:5)       | 0.81 | 0.40 | 1.63  | 5.55E-01 | 7.6E-01 | 0.95 |
| 473 | phosphatidylcholine             | PC(35:5)            | 0.83 | 0.44 | 1.55  | 5.55E-01 | 3.9E-01 | 0.85 |
| 474 | phosphatidylcholine             | PC(18:1_20:3)       | 0.81 | 0.41 | 1.61  | 5.59E-01 | 9.9E-01 | 1.00 |
| 475 | ceramide                        | Cer(d17:1/16:0)     | 1.31 | 0.53 | 3.24  | 5.59E-01 | 4.0E-02 | 1.24 |
| 476 | alkenylphosphatidylethanolamine | PE(P-16:0/20:3) (a) | 0.77 | 0.33 | 1.83  | 5.60E-01 | 8.1E-02 | 0.80 |
| 477 | sphingomyelin                   | SM(d18:2/22:0)      | 1.39 | 0.46 | 4.18  | 5.60E-01 | 4.0E-03 | 1.32 |
| 478 | alkenylphosphatidylethanolamine | PE(P-18:1/20:4) (b) | 1.24 | 0.61 | 2.53  | 5.61E-01 | 7.5E-02 | 0.78 |
| 479 | lysophosphatidylcholine         | LPE(20:4) [sn2]     | 1.34 | 0.50 | 3.56  | 5.61E-01 | 8.0E-01 | 0.97 |
| 480 | phosphatidylcholine             | PC(16:1_20:4)       | 0.87 | 0.53 | 1.41  | 5.63E-01 | 1.9E-01 | 0.70 |
| 481 | lysophosphatidylcholine         | LPC(22:6) [sn2]     | 1.30 | 0.54 | 3.13  | 5.64E-01 | 3.0E-01 | 1.14 |
| 482 | free fatty acid                 | FA(17:1)            | 1.36 | 0.48 | 3.85  | 5.66E-01 | 1.4E-04 | 1.41 |
| 483 | alkylphosphatidylcholine        | PC(O-38:5)          | 1.40 | 0.44 | 4.48  | 5.69E-01 | 9.1E-04 | 1.44 |
| 484 | sphingomyelin                   | SM(d17:1/14:0)      | 0.75 | 0.27 | 2.05  | 5.74E-01 | 5.6E-01 | 1.09 |
| 485 | phosphatidylcholine             | PC(15-MHDA_20:4)    | 1.27 | 0.56 | 2.88  | 5.74E-01 | 2.1E-01 | 1.16 |
| 486 | dihexosylceramide               | Hex2Cer(d18:1/24:0) | 0.76 | 0.28 | 2.02  | 5.75E-01 | 7.8E-02 | 1.21 |
| 487 | alkenylphosphatidylethanolamine | PE(P-19:0/20:4) (a) | 1.17 | 0.67 | 2.05  | 5.78E-01 | 6.5E-01 | 1.11 |

|     |                                 |                            |      |      |      |          |         |      |
|-----|---------------------------------|----------------------------|------|------|------|----------|---------|------|
| 488 | cholesterol ester               | CE(18:1)                   | 1.62 | 0.30 | 8.74 | 5.78E-01 | 5.5E-04 | 1.20 |
| 489 | lysophosphatidylcholine         | LPC(24:0) [sn2]            | 0.76 | 0.28 | 2.05 | 5.80E-01 | 5.0E-01 | 1.06 |
| 490 | alkenylphosphatidylethanolamine | PE(P-16:0/22:6)            | 0.71 | 0.22 | 2.36 | 5.81E-01 | 9.5E-01 | 0.99 |
| 491 | alkylphosphatidylcholine        | PC(O-40:7) (b)             | 1.23 | 0.59 | 2.58 | 5.81E-01 | 6.8E-02 | 1.35 |
| 492 | alkenylphosphatidylethanolamine | PE(P-18:1/18:3)            | 1.19 | 0.64 | 2.23 | 5.83E-01 | 8.5E-01 | 1.03 |
| 493 | alkenylphosphatidylethanolamine | PE(P-18:1/22:4)            | 1.36 | 0.45 | 4.16 | 5.83E-01 | 1.1E-01 | 1.24 |
| 494 | alkenylphosphatidylethanolamine | PE(P-20:1/20:4)            | 1.15 | 0.69 | 1.93 | 5.87E-01 | 1.8E-01 | 1.41 |
| 495 | ceramide                        | Cer(d16:1/24:1)            | 0.80 | 0.36 | 1.79 | 5.87E-01 | 1.3E-01 | 0.81 |
| 496 | triacylglycerol                 | TG(58:9) [SIM]             | 1.19 | 0.63 | 2.25 | 5.87E-01 | 4.8E-01 | 1.17 |
| 497 | phosphatidylcholine             | PC(33:0) (a)               | 0.64 | 0.13 | 3.20 | 5.88E-01 | 4.6E-01 | 0.95 |
| 498 | cholesterol ester               | CE(20:1)                   | 1.29 | 0.51 | 3.28 | 5.90E-01 | 6.7E-03 | 1.34 |
| 499 | phosphatidylcholine             | PC(40:7) (a)               | 0.80 | 0.36 | 1.79 | 5.90E-01 | 2.9E-01 | 0.85 |
| 500 | lysophosphatidylcholine         | LPE(18:2) [sn2]            | 1.18 | 0.64 | 2.15 | 5.96E-01 | 2.5E-01 | 0.86 |
| 501 | lysophosphatidylcholine         | LPC(20:3) [sn1]            | 0.79 | 0.34 | 1.86 | 6.00E-01 | 4.2E-01 | 0.87 |
| 502 | lysophosphatidylcholine         | LPE(P-16:0)                | 1.38 | 0.42 | 4.53 | 6.01E-01 | 1.4E-01 | 0.89 |
| 503 | phosphatidylinositol            | PI(20:0_20:4)              | 0.82 | 0.38 | 1.75 | 6.03E-01 | 2.3E-01 | 0.86 |
| 504 | triacylglycerol                 | TG(58:9) [NL-22:6]         | 1.14 | 0.70 | 1.86 | 6.04E-01 | 4.6E-01 | 1.24 |
| 505 | phosphatidylethanolamine        | PE(17:0_18:1)              | 0.88 | 0.54 | 1.43 | 6.04E-01 | 1.5E-01 | 0.75 |
| 506 | demosterol                      | DE(16:0)                   | 1.18 | 0.62 | 2.22 | 6.07E-01 | 5.3E-02 | 1.34 |
| 507 | phosphatidic acid               | PA(36:2)                   | 0.80 | 0.35 | 1.86 | 6.07E-01 | 8.8E-01 | 1.03 |
| 508 | triacylglycerol                 | TG(53:2) [NL-18:1]         | 0.90 | 0.61 | 1.34 | 6.11E-01 | 1.0E-01 | 0.72 |
| 509 | phosphatidylcholine             | PC(36:6) (a)               | 0.88 | 0.53 | 1.46 | 6.20E-01 | 2.3E-01 | 0.77 |
| 510 | triacylglycerol                 | TG(52:3) [SIM]             | 1.29 | 0.47 | 3.59 | 6.23E-01 | 1.8E-01 | 1.15 |
| 511 | lysophosphatidylcholine         | LPC(22:6) [sn1]            | 1.24 | 0.52 | 2.99 | 6.25E-01 | 4.4E-01 | 1.11 |
| 512 | monohexosylceramide             | HexCer(d18:1/22:0)         | 1.26 | 0.50 | 3.19 | 6.25E-01 | 1.0E-01 | 1.22 |
| 513 | alkenylphosphatidylethanolamine | PE(P-18:1/20:5) (b)        | 0.90 | 0.59 | 1.38 | 6.29E-01 | 2.2E-01 | 0.74 |
| 514 | ceramide                        | Cer(d18:2/14:0)            | 0.90 | 0.59 | 1.37 | 6.29E-01 | 2.9E-01 | 0.71 |
| 515 | lysophosphatidylinositol        | LPI(18:2) [sn2]            | 0.83 | 0.39 | 1.76 | 6.30E-01 | 6.2E-01 | 1.10 |
| 516 | alkylphosphatidylcholine        | PC(O-16:0/20:3)            | 0.75 | 0.24 | 2.40 | 6.34E-01 | 8.0E-02 | 1.23 |
| 517 | lysoalkylphosphatidylcholine    | LPC(O-22:0)                | 0.73 | 0.20 | 2.71 | 6.35E-01 | 2.2E-01 | 1.09 |
| 518 | alkylphosphatidylcholine        | PC(O-18:0/22:6)            | 0.78 | 0.28 | 2.19 | 6.35E-01 | 1.8E-02 | 1.30 |
| 519 | monoalkyl diacylglycerol        | TG(O-50:1) [SIM]           | 0.83 | 0.37 | 1.85 | 6.36E-01 | 2.0E-02 | 0.76 |
| 520 | phosphatidylcholine             | PC(33:2)                   | 0.78 | 0.29 | 2.13 | 6.37E-01 | 6.4E-01 | 1.06 |
| 521 | triacylglycerol                 | TG(56:8) [SIM]             | 0.87 | 0.48 | 1.58 | 6.42E-01 | 6.8E-01 | 0.92 |
| 522 | phosphatidylcholine             | PC(16:0_18:1)              | 0.67 | 0.12 | 3.69 | 6.43E-01 | 1.1E-01 | 1.09 |
| 523 | phosphatidylcholine             | PC(15-MHDA_18:1)           | 1.27 | 0.45 | 3.57 | 6.44E-01 | 4.7E-02 | 1.19 |
| 524 | lysoalkenylphosphatidylcholine  | LPC(P-17:0) (a)            | 1.35 | 0.38 | 4.84 | 6.46E-01 | 5.4E-01 | 0.96 |
| 525 | phosphatidylcholine             | PC(38:4) (b)               | 0.82 | 0.35 | 1.91 | 6.46E-01 | 3.0E-01 | 0.85 |
| 526 | GM3 ganglioside                 | GM3(d18:1/22:0)            | 1.33 | 0.39 | 4.51 | 6.47E-01 | 8.4E-01 | 1.02 |
| 527 | lysophosphatidylcholine         | LPE(18:2) [sn1]            | 1.16 | 0.62 | 2.17 | 6.49E-01 | 1.5E-01 | 0.84 |
| 528 | phosphatidylinositol            | PI(18:0_20:2)              | 1.20 | 0.54 | 2.66 | 6.51E-01 | 6.6E-01 | 1.06 |
| 529 | free fatty acid                 | FA(18:1)                   | 1.12 | 0.69 | 1.81 | 6.53E-01 | 2.0E-04 | 2.25 |
| 530 | lysophosphatidylcholine         | LPC(18:1) [sn2]            | 1.31 | 0.40 | 4.30 | 6.55E-01 | 6.5E-01 | 1.04 |
| 531 | lysoalkylphosphatidylcholine    | LPC(O-24:1)                | 0.80 | 0.31 | 2.11 | 6.56E-01 | 7.1E-03 | 1.34 |
| 532 | sphingomyelin                   | SM(d18:2/14:0)             | 0.72 | 0.18 | 2.98 | 6.58E-01 | 7.9E-01 | 1.03 |
| 533 | monoalkyl diacylglycerol        | TG(O-54:3) [NL-18:1]       | 0.85 | 0.40 | 1.81 | 6.63E-01 | 1.3E-01 | 0.82 |
| 534 | triacylglycerol                 | TG(54:2) [SIM]             | 0.91 | 0.58 | 1.41 | 6.63E-01 | 8.1E-02 | 0.71 |
| 535 | monoalkyl diacylglycerol        | TG(O-52:2) [NL-17:1]       | 0.87 | 0.45 | 1.67 | 6.63E-01 | 8.6E-03 | 0.65 |
| 536 | phosphatidylcholine             | PC(38:6) (a)               | 0.74 | 0.19 | 2.92 | 6.64E-01 | 7.2E-01 | 0.97 |
| 537 | phosphatidylcholine             | PC(18:1_18:1)              | 1.36 | 0.34 | 5.33 | 6.65E-01 | 1.6E-02 | 1.21 |
| 538 | alkenylphosphatidylcholine      | PC(P-16:0/18:2)            | 0.76 | 0.21 | 2.74 | 6.66E-01 | 3.1E-01 | 1.09 |
| 539 | lysophosphatidylcholine         | LPC(20:3) [sn2]            | 0.83 | 0.37 | 1.89 | 6.68E-01 | 3.9E-01 | 0.86 |
| 540 | triacylglycerol                 | TG(54:2) [NL-18:0]         | 0.91 | 0.60 | 1.38 | 6.71E-01 | 4.1E-02 | 0.62 |
| 541 | cholesterol ester               | CE(14:0)                   | 0.85 | 0.41 | 1.79 | 6.73E-01 | 9.2E-01 | 1.02 |
| 542 | ceramide                        | Cer(d18:1/22:0)            | 1.29 | 0.39 | 4.27 | 6.75E-01 | 4.5E-01 | 0.92 |
| 543 | lysophosphatidylinositol        | LPI(18:1) [sn2]            | 0.89 | 0.52 | 1.54 | 6.75E-01 | 2.7E-02 | 1.60 |
| 544 | phosphatidylcholine             | PC(18:0_22:6)              | 0.81 | 0.29 | 2.25 | 6.80E-01 | 8.2E-01 | 1.03 |
| 545 | monohexosylceramide             | HexCer(d18:2/22:0)         | 1.23 | 0.47 | 3.21 | 6.81E-01 | 6.7E-02 | 1.25 |
| 546 | cholesterol ester               | CE(24:4)                   | 0.89 | 0.51 | 1.55 | 6.81E-01 | 2.2E-01 | 1.24 |
| 547 | triacylglycerol                 | TG(52:2) [SIM]             | 1.24 | 0.45 | 3.41 | 6.81E-01 | 3.2E-01 | 1.09 |
| 548 | monoalkyl diacylglycerol        | TG(O-50:2) [NL-18:1]       | 0.86 | 0.41 | 1.79 | 6.82E-01 | 4.0E-01 | 0.87 |
| 549 | lysophosphatidylcholine         | LPC(18:3) [sn2] (a)        | 0.89 | 0.52 | 1.53 | 6.82E-01 | 4.7E-01 | 0.89 |
| 550 | alkenylphosphatidylethanolamine | PE(P-19:0/20:4) (b)        | 1.16 | 0.57 | 2.35 | 6.82E-01 | 5.8E-01 | 1.09 |
| 551 | lysophosphatidylinositol        | LPI(20:4) [sn2]            | 0.82 | 0.33 | 2.08 | 6.82E-01 | 3.6E-01 | 1.13 |
| 552 | ceramide                        | Cer(d18:1/24:0)            | 0.82 | 0.31 | 2.17 | 6.83E-01 | 3.0E-01 | 0.89 |
| 553 | phosphatidylcholine             | PC(40:8)                   | 1.26 | 0.42 | 3.79 | 6.87E-01 | 9.5E-01 | 1.01 |
| 554 | sphingomyelin                   | SM(41:0)                   | 0.71 | 0.14 | 3.69 | 6.87E-01 | 4.3E-01 | 1.07 |
| 555 | alkenylphosphatidylethanolamine | PE(P-16:0/22:4)            | 1.25 | 0.42 | 3.68 | 6.88E-01 | 3.8E-01 | 1.13 |
| 556 | alkylphosphatidylcholine        | PC(O-40:5)                 | 0.78 | 0.23 | 2.64 | 6.89E-01 | 6.7E-04 | 1.33 |
| 557 | alkenylphosphatidylethanolamine | PE(P-18:1/18:1) (b)        | 1.17 | 0.54 | 2.56 | 6.89E-01 | 2.9E-01 | 0.85 |
| 558 | triacylglycerol                 | TG(53:2) [SIM]             | 0.91 | 0.59 | 1.41 | 6.90E-01 | 1.2E-01 | 0.74 |
| 559 | ceramide                        | Cer(d17:1/24:0)            | 0.86 | 0.42 | 1.77 | 6.90E-01 | 1.5E-01 | 0.77 |
| 560 | alkenylphosphatidylethanolamine | PE(P-18:1/20:5) (a)        | 0.91 | 0.57 | 1.45 | 6.91E-01 | 6.0E-01 | 0.89 |
| 561 | alkenylphosphatidylethanolamine | PE(P-18:0/22:5) (n6)       | 0.86 | 0.41 | 1.80 | 6.91E-01 | 2.8E-01 | 0.81 |
| 562 | phosphatidylinositol            | PI(38:5) (a)               | 0.78 | 0.23 | 2.66 | 6.93E-01 | 7.5E-01 | 0.97 |
| 563 | triacylglycerol                 | TG(52:3) [NL-18:2]         | 1.21 | 0.48 | 3.03 | 6.93E-01 | 2.2E-01 | 1.14 |
| 564 | sulfatide                       | Sulfatide (d18:1/24:0(OH)) | 0.87 | 0.43 | 1.75 | 6.94E-01 | 2.5E-01 | 0.85 |
| 565 | phosphatidylinositol            | PI(18:0_22:4)              | 0.86 | 0.41 | 1.81 | 6.96E-01 | 2.8E-01 | 0.83 |
| 566 | alkylphosphatidylethanolamine   | PE(O-16:0/22:6)            | 0.82 | 0.31 | 2.19 | 6.97E-01 | 8.4E-01 | 1.02 |
| 567 | alkenylphosphatidylcholine      | PC(P-16:0/16:0)            | 1.27 | 0.39 | 4.09 | 6.97E-01 | 1.7E-02 | 1.33 |
| 568 | monoalkyl diacylglycerol        | TG(O-50:3) [SIM]           | 1.26 | 0.39 | 4.00 | 6.98E-01 | 8.1E-01 | 1.02 |
| 569 | alkenylphosphatidylcholine      | PC(P-15:0/20:4) (b)        | 1.12 | 0.62 | 2.02 | 7.01E-01 | 7.3E-01 | 0.93 |

|     |                                 |                               |      |      |      |          |         |      |
|-----|---------------------------------|-------------------------------|------|------|------|----------|---------|------|
| 570 | monohexosylceramide             | HexCer(d18:2/24:0)            | 1.18 | 0.51 | 2.73 | 7.02E-01 | 7.0E-02 | 1.26 |
| 571 | dihexosylceramide               | Hex2Cer(d18:1/22:0)           | 1.20 | 0.48 | 3.01 | 7.03E-01 | 6.1E-02 | 1.24 |
| 572 | alkenylphosphatidylcholine      | PC(P-20:0/20:4)               | 1.21 | 0.45 | 3.22 | 7.04E-01 | 2.8E-02 | 1.32 |
| 573 | triacylglycerol                 | TG(52:4) [SIM]                | 1.20 | 0.46 | 3.14 | 7.05E-01 | 4.2E-01 | 1.09 |
| 574 | dihexosylceramide               | Hex2Cer(d18:2/24:1)           | 1.15 | 0.57 | 2.33 | 7.05E-01 | 1.4E-04 | 1.78 |
| 575 | alkenylphosphatidylethanolamine | PE(P-18:1/18:2) (b)           | 1.14 | 0.58 | 2.25 | 7.05E-01 | 3.7E-01 | 0.85 |
| 576 | monoalkyl diacylglycerol        | TG(O-52:1) [SIM]              | 0.88 | 0.44 | 1.75 | 7.05E-01 | 1.0E-03 | 0.67 |
| 577 | dihydroceramide                 | Cer(d18:0/20:0)               | 1.19 | 0.49 | 2.88 | 7.06E-01 | 1.2E-01 | 1.22 |
| 578 | monoalkyl diacylglycerol        | TG(O-52:1) [NL-18:1]          | 0.91 | 0.55 | 1.50 | 7.08E-01 | 4.0E-04 | 0.54 |
| 579 | ceramide                        | Cer(d18:2/26:0)               | 1.15 | 0.56 | 2.36 | 7.08E-01 | 3.8E-01 | 1.17 |
| 580 | lysophosphatidylcholine         | LPC(22:4) [sn2]               | 0.87 | 0.41 | 1.84 | 7.08E-01 | 5.6E-01 | 0.90 |
| 581 | GM3 ganglioside                 | GM3(d18:1/24:0)               | 1.17 | 0.51 | 2.71 | 7.09E-01 | 5.7E-02 | 1.22 |
| 582 | GM3 ganglioside                 | GM3(d18:1/18:0)               | 1.26 | 0.37 | 4.28 | 7.11E-01 | 2.0E-01 | 1.12 |
| 583 | phosphatidylethanolamine        | PE(17:0_22:6)                 | 0.90 | 0.52 | 1.57 | 7.11E-01 | 7.5E-01 | 1.05 |
| 584 | monoalkyl diacylglycerol        | TG(O-50:2) [NL-16:1]          | 0.85 | 0.35 | 2.06 | 7.13E-01 | 5.4E-01 | 1.09 |
| 585 | lysophosphatidylcholine         | LPC(18:1) [sn1]               | 1.29 | 0.33 | 5.12 | 7.13E-01 | 5.8E-01 | 1.05 |
| 586 | alkylphosphatidylethanolamine   | PE(O-18:0/22:6)               | 0.81 | 0.26 | 2.53 | 7.13E-01 | 8.6E-01 | 0.98 |
| 587 | alkylphosphatidylethanolamine   | PE(O-34:1)                    | 1.20 | 0.45 | 3.25 | 7.14E-01 | 8.5E-01 | 1.03 |
| 588 | sulfatide                       | Sulfatide (d18:1/16:0)        | 1.17 | 0.51 | 2.66 | 7.16E-01 | 4.5E-01 | 1.10 |
| 589 | phosphatidylcholine             | PC(15:0_22:6)                 | 0.86 | 0.37 | 1.99 | 7.18E-01 | 8.0E-01 | 1.04 |
| 590 | ceramide                        | Cer(d18:2/23:0)               | 1.16 | 0.52 | 2.55 | 7.20E-01 | 2.9E-01 | 0.85 |
| 591 | sphingomyelin                   | SM(d18:2/24:0)                | 1.25 | 0.37 | 4.20 | 7.21E-01 | 7.5E-03 | 1.27 |
| 592 | alkenylphosphatidylethanolamine | PE(P-18:0/20:5)               | 0.91 | 0.55 | 1.53 | 7.24E-01 | 6.5E-01 | 0.91 |
| 593 | phosphatidylinositol            | PI(18:1_18:2)                 | 1.13 | 0.57 | 2.24 | 7.25E-01 | 5.2E-02 | 1.31 |
| 594 | alkylphosphatidylethanolamine   | PE(O-16:0/22:4)               | 0.86 | 0.38 | 1.96 | 7.25E-01 | 8.9E-01 | 0.97 |
| 595 | monoalkyl diacylglycerol        | TG(O-50:2) [NL-18:2]          | 0.89 | 0.47 | 1.69 | 7.28E-01 | 2.0E-01 | 0.82 |
| 596 | lysoalkylphosphatidylcholine    | LPC(O-24:2)                   | 0.88 | 0.44 | 1.79 | 7.30E-01 | 6.9E-02 | 1.27 |
| 597 | sphingomyelin                   | SM(d18:1/24:0)                | 0.80 | 0.23 | 2.84 | 7.30E-01 | 4.2E-02 | 1.21 |
| 598 | alkenylphosphatidylcholine      | PC(P-16:0/22:6)               | 0.83 | 0.29 | 2.37 | 7.32E-01 | 3.9E-01 | 1.10 |
| 599 | diacylglycerol                  | DG(18:2_18:2)                 | 0.93 | 0.61 | 1.41 | 7.32E-01 | 7.6E-01 | 0.93 |
| 600 | monoalkyl diacylglycerol        | TG(O-54:2) [NL-18:1]          | 0.90 | 0.48 | 1.67 | 7.34E-01 | 3.0E-03 | 0.68 |
| 601 | alkenylphosphatidylethanolamine | PE(P-18:0/18:2)               | 1.17 | 0.47 | 2.89 | 7.35E-01 | 2.9E-01 | 0.88 |
| 602 | trihexosylceramide              | Hex3Cer(d18:1/24:0)           | 0.87 | 0.40 | 1.92 | 7.35E-01 | 5.3E-04 | 1.41 |
| 603 | alkenylphosphatidylcholine      | PC(P-18:0/22:5)               | 1.17 | 0.46 | 3.02 | 7.40E-01 | 2.5E-02 | 1.36 |
| 604 | GM1 ganglioside                 | GM1(d18:1/16:0)               | 1.14 | 0.52 | 2.47 | 7.43E-01 | 2.3E-05 | 1.57 |
| 605 | sphingomyelin                   | SM(d18:1/22:0)/SM(d16:1/2     | 1.37 | 0.20 | 9.27 | 7.44E-01 | 4.4E-02 | 1.14 |
| 606 | lysophosphatidylcholine         | LPC(18:3) [sn1] (a)/LPC(18:3) | 0.92 | 0.54 | 1.55 | 7.46E-01 | 1.0E-01 | 0.71 |
| 607 | alkylphosphatidylethanolamine   | PE(O-16:0/20:4)               | 1.12 | 0.57 | 2.21 | 7.47E-01 | 8.1E-01 | 1.04 |
| 608 | lysophosphatidylcholine         | LPE(18:0) [sn2]               | 0.84 | 0.29 | 2.44 | 7.49E-01 | 3.7E-02 | 0.82 |
| 609 | lysophosphatidylcholine         | LPC(22:4) [sn1]               | 0.89 | 0.42 | 1.87 | 7.49E-01 | 5.3E-01 | 0.88 |
| 610 | phosphatidylinositol            | PI(39:6)                      | 0.90 | 0.46 | 1.74 | 7.49E-01 | 8.4E-01 | 1.04 |
| 611 | cholesterol ester               | CE(18:2) [+OH]                | 1.10 | 0.61 | 2.00 | 7.49E-01 | 8.2E-01 | 0.97 |
| 612 | lysophosphatidylcholine         | LPC(15:0) [sn1]               | 0.84 | 0.28 | 2.50 | 7.50E-01 | 2.1E-01 | 0.84 |
| 613 | monoalkyl diacylglycerol        | TG(O-52:2) [NL-18:1]          | 0.90 | 0.47 | 1.73 | 7.52E-01 | 2.8E-02 | 0.72 |
| 614 | phosphatidic acid               | PA(40:6)                      | 0.89 | 0.44 | 1.80 | 7.54E-01 | 1.2E-01 | 1.29 |
| 615 | alkylphosphatidylcholine        | PC(O-18:0/18:2)               | 1.15 | 0.47 | 2.85 | 7.55E-01 | 6.0E-02 | 1.27 |
| 616 | phosphatidylethanolamine        | PE(17:0_20:4)                 | 0.91 | 0.49 | 1.69 | 7.57E-01 | 8.8E-01 | 1.02 |
| 617 | alkenylphosphatidylethanolamine | PE(P-18:1/22:6) (a)           | 1.12 | 0.55 | 2.27 | 7.59E-01 | 4.1E-01 | 1.13 |
| 618 | monoalkyl diacylglycerol        | TG(O-50:2) [SIM]              | 0.85 | 0.30 | 2.43 | 7.59E-01 | 7.8E-01 | 0.97 |
| 619 | free fatty acid                 | FA(14:0)                      | 0.86 | 0.33 | 2.23 | 7.60E-01 | 9.2E-03 | 1.32 |
| 620 | lysophosphatidylcholine         | LPC(22:5) [sn1] (n6)          | 0.91 | 0.49 | 1.68 | 7.62E-01 | 3.3E-01 | 0.81 |
| 621 | lysophosphatidylcholine         | LPC(18:3) (a) [sn1] [104_sn1] | 0.91 | 0.50 | 1.66 | 7.63E-01 | 4.8E-01 | 0.91 |
| 622 | alkenylphosphatidylethanolamine | PE(P-16:0/20:5)               | 0.93 | 0.58 | 1.49 | 7.65E-01 | 5.3E-01 | 0.86 |
| 623 | phosphatidylcholine             | PC(20:0_20:4)                 | 0.85 | 0.29 | 2.50 | 7.65E-01 | 2.1E-02 | 1.25 |
| 624 | alkenylphosphatidylcholine      | PC(P-15:0/20:4) (a)           | 0.94 | 0.60 | 1.45 | 7.66E-01 | 1.2E-01 | 0.68 |
| 625 | alkylphosphatidylethanolamine   | PE(O-18:1/22:6)               | 1.13 | 0.50 | 2.54 | 7.66E-01 | 1.9E-01 | 1.19 |
| 626 | phosphatidylcholine             | PC(18:2_20:5)                 | 0.92 | 0.52 | 1.62 | 7.69E-01 | 3.7E-01 | 0.86 |
| 627 | alkenylphosphatidylethanolamine | PE(P-16:0/18:2)               | 1.15 | 0.45 | 2.94 | 7.72E-01 | 1.4E-01 | 0.87 |
| 628 | triacylglycerol                 | TG(52:3) [NL-16:1]            | 1.10 | 0.58 | 2.08 | 7.77E-01 | 5.3E-01 | 1.11 |
| 629 | dihydroceramide                 | Cer(d18:0/16:0)               | 1.15 | 0.43 | 3.09 | 7.78E-01 | 4.2E-01 | 1.09 |
| 630 | phosphatidylcholine             | PC(38:2)                      | 0.78 | 0.14 | 4.30 | 7.78E-01 | 1.4E-01 | 1.08 |
| 631 | sulfatide                       | Sulfatide (d18:1/24:1)        | 1.09 | 0.61 | 1.95 | 7.78E-01 | 9.5E-02 | 1.30 |
| 632 | phosphatidic acid               | PA(36:4)                      | 0.91 | 0.46 | 1.80 | 7.79E-01 | 8.1E-01 | 1.04 |
| 633 | alkenylphosphatidylcholine      | PC(P-17:0/20:4) (a)           | 1.12 | 0.51 | 2.46 | 7.79E-01 | 3.4E-01 | 1.15 |
| 634 | triacylglycerol                 | TG(54:6) [SIM]                | 1.09 | 0.61 | 1.95 | 7.81E-01 | 4.6E-01 | 0.88 |
| 635 | phosphatidylinositol            | PI(37:6)                      | 1.10 | 0.57 | 2.09 | 7.82E-01 | 7.4E-01 | 1.04 |
| 636 | lysophosphatidylcholine         | LPE(P-20:0)                   | 1.13 | 0.48 | 2.64 | 7.85E-01 | 1.0E-01 | 1.16 |
| 637 | triacylglycerol                 | TG(54:5) [NL-20:4]            | 0.91 | 0.46 | 1.80 | 7.89E-01 | 3.6E-01 | 0.90 |
| 638 | alkylphosphatidylethanolamine   | PE(O-38:5) (a)                | 1.14 | 0.43 | 3.07 | 7.92E-01 | 7.8E-01 | 0.96 |
| 639 | lysophosphatidylcholine         | LPE(16:0) [sn1]               | 0.89 | 0.39 | 2.07 | 7.94E-01 | 1.3E-01 | 0.82 |
| 640 | alkenylphosphatidylcholine      | PC(P-38:5) (b)                | 1.12 | 0.49 | 2.54 | 7.94E-01 | 6.5E-01 | 1.07 |
| 641 | dihydroceramide                 | Cer(d18:0/24:1)               | 1.11 | 0.50 | 2.48 | 7.95E-01 | 1.6E-01 | 1.22 |
| 642 | phosphatidylethanolamine        | PE(18:1_18:2)                 | 0.93 | 0.53 | 1.63 | 7.96E-01 | 8.3E-01 | 0.95 |
| 643 | phosphatidylethanolamine        | PE(18:1_18:1)                 | 0.95 | 0.62 | 1.44 | 7.98E-01 | 8.1E-01 | 0.93 |
| 644 | lysophosphatidylcholine         | LPE(22:6) [sn2]               | 1.10 | 0.53 | 2.26 | 7.98E-01 | 5.3E-01 | 1.10 |
| 645 | lysophosphatidylcholine         | LPC(17:1) (a) [sn1] [104_sn1] | 0.89 | 0.35 | 2.25 | 8.03E-01 | 2.6E-01 | 0.83 |
| 646 | lysophosphatidylinositol        | LPI(20:4) [sn1]               | 1.10 | 0.53 | 2.28 | 8.03E-01 | 5.2E-02 | 1.33 |
| 647 | alkenylphosphatidylethanolamine | PE(P-16:0/22:5) (n3)          | 0.86 | 0.25 | 2.94 | 8.07E-01 | 3.4E-01 | 0.91 |
| 648 | monoalkyl diacylglycerol        | TG(O-54:4) [NL-17:1]          | 1.10 | 0.49 | 2.46 | 8.11E-01 | 7.2E-01 | 0.95 |
| 649 | phosphatidylserine              | PS(40:6)                      | 1.14 | 0.38 | 3.43 | 8.11E-01 | 2.8E-01 | 1.10 |
| 650 | lysophosphatidylcholine         | LPE(22:6) [sn1]               | 1.09 | 0.55 | 2.15 | 8.12E-01 | 8.7E-01 | 1.03 |
| 651 | triacylglycerol                 | TG(52:1) [NL-18:1]            | 1.11 | 0.47 | 2.63 | 8.15E-01 | 4.7E-01 | 1.07 |

|     |                                 |                                |      |      |      |          |         |      |
|-----|---------------------------------|--------------------------------|------|------|------|----------|---------|------|
| 652 | alkenylphosphatidylethanolamine | PE(P-18:1/22:5) (b)            | 0.92 | 0.46 | 1.83 | 8.15E-01 | 5.6E-01 | 0.89 |
| 653 | alkylphosphatidylcholine        | PC(O-35:4)                     | 0.93 | 0.52 | 1.67 | 8.16E-01 | 3.1E-01 | 1.22 |
| 654 | free fatty acid                 | FA(15:0)                       | 0.89 | 0.33 | 2.42 | 8.16E-01 | 3.1E-04 | 1.40 |
| 655 | dihydroceramide                 | Cer(d18:0/22:0)                | 0.91 | 0.39 | 2.09 | 8.17E-01 | 4.1E-01 | 0.90 |
| 656 | phosphatidylcholine             | PC(15:0_20:3)                  | 0.89 | 0.35 | 2.31 | 8.18E-01 | 6.6E-01 | 0.95 |
| 657 | cholesterol ester               | CE(24:5)                       | 0.95 | 0.58 | 1.53 | 8.20E-01 | 1.4E-01 | 1.33 |
| 658 | alkenylphosphatidylcholine      | PC(P-16:0/20:5)                | 0.93 | 0.51 | 1.69 | 8.21E-01 | 9.8E-01 | 1.00 |
| 659 | monoalkyl diacylglycerol        | TG(O-50:1) [NL-18:1]           | 0.94 | 0.55 | 1.60 | 8.21E-01 | 4.0E-02 | 0.67 |
| 660 | phosphatidylethanolamine        | PE(18:1_22:6) (a)              | 0.95 | 0.58 | 1.55 | 8.23E-01 | 4.2E-01 | 1.17 |
| 661 | alkylphosphatidylcholine        | PC(O-40:7) (a)                 | 0.91 | 0.40 | 2.06 | 8.23E-01 | 3.8E-03 | 1.44 |
| 662 | phosphatidylcholine             | PC(18:0_22:5) (n3)             | 0.88 | 0.27 | 2.81 | 8.24E-01 | 5.6E-01 | 0.93 |
| 663 | triacylglycerol                 | TG(54:6) [NL-20:5]             | 0.92 | 0.45 | 1.89 | 8.24E-01 | 4.4E-01 | 0.87 |
| 664 | lysophosphatidylcholine         | LPC(22:0) [sn1]                | 0.91 | 0.39 | 2.11 | 8.24E-01 | 9.6E-01 | 1.00 |
| 665 | cholesterol ester               | CE(16:1)                       | 0.92 | 0.45 | 1.90 | 8.25E-01 | 7.0E-01 | 1.07 |
| 666 | lysoalkylphosphatidylcholine    | LPC(O-16:0)                    | 1.18 | 0.27 | 5.08 | 8.26E-01 | 5.4E-01 | 1.04 |
| 667 | phosphatidylglycerol            | PG(36:2)                       | 0.94 | 0.54 | 1.64 | 8.26E-01 | 2.8E-01 | 0.80 |
| 668 | alkenylphosphatidylethanolamine | PE(P-16:0/18:3)                | 1.06 | 0.64 | 1.76 | 8.28E-01 | 3.5E-01 | 0.86 |
| 669 | alkenylphosphatidylcholine      | PC(P-35:2)(a)                  | 1.10 | 0.47 | 2.54 | 8.29E-01 | 5.5E-01 | 1.09 |
| 670 | alkenylphosphatidylethanolamine | PE(P-18:0/20:4)                | 1.10 | 0.45 | 2.70 | 8.29E-01 | 1.9E-01 | 0.85 |
| 671 | lysophosphatidylcholine         | LPC(22:5) [sn1] (n3)/LPC(22:5) | 1.10 | 0.48 | 2.52 | 8.30E-01 | 7.5E-01 | 0.95 |
| 672 | alkenylphosphatidylethanolamine | PE(P-18:1/20:3) (a)            | 1.10 | 0.46 | 2.61 | 8.31E-01 | 7.9E-01 | 0.97 |
| 673 | alkenylphosphatidylethanolamine | PE(P-16:0/20:4)                | 1.10 | 0.47 | 2.57 | 8.33E-01 | 8.8E-02 | 0.82 |
| 674 | lysophosphatidylcholine         | LPC(20:0) [sn1]                | 1.11 | 0.41 | 3.04 | 8.37E-01 | 1.4E-01 | 1.11 |
| 675 | phosphatidylinositol            | PI(18:0_22:5) (n6)             | 1.07 | 0.54 | 2.12 | 8.40E-01 | 9.5E-01 | 1.01 |
| 676 | alkylphosphatidylcholine        | PC(O-34:1)                     | 1.11 | 0.41 | 3.02 | 8.42E-01 | 6.3E-05 | 1.50 |
| 677 | alkenylphosphatidylethanolamine | PE(P-18:0/22:5) (n3)           | 1.11 | 0.41 | 3.00 | 8.43E-01 | 2.7E-01 | 0.86 |
| 678 | alkenylphosphatidylethanolamine | PE(P-18:0/20:3) (b)            | 0.92 | 0.41 | 2.07 | 8.43E-01 | 2.3E-01 | 0.83 |
| 679 | trihexosylceramide              | Hex3Cer(d18:1/22:0)            | 1.08 | 0.50 | 2.32 | 8.46E-01 | 8.2E-04 | 1.39 |
| 680 | alkylphosphatidylethanolamine   | PE(O-18:0/22:5)                | 0.91 | 0.37 | 2.27 | 8.48E-01 | 3.3E-01 | 0.86 |
| 681 | alkylphosphatidylethanolamine   | PE(O-16:0/20:3)                | 0.91 | 0.34 | 2.43 | 8.51E-01 | 5.3E-01 | 0.93 |
| 682 | phosphatidylethanolamine        | PE(15-MHDA_22:6)               | 0.95 | 0.54 | 1.67 | 8.51E-01 | 8.7E-01 | 0.98 |
| 683 | alkenylphosphatidylethanolamine | PE(P-20:0/20:4)                | 0.92 | 0.39 | 2.18 | 8.54E-01 | 3.9E-01 | 1.16 |
| 684 | alkenylphosphatidylethanolamine | PE(P-17:0/22:6) (b)            | 1.09 | 0.45 | 2.64 | 8.56E-01 | 6.3E-01 | 1.06 |
| 685 | phosphatidylinositol            | PI(18:0_20:4)                  | 0.91 | 0.31 | 2.66 | 8.61E-01 | 6.1E-01 | 0.95 |
| 686 | dihexosylceramide               | Hex2Cer(d16:1/24:1)            | 0.93 | 0.39 | 2.18 | 8.62E-01 | 2.4E-02 | 1.40 |
| 687 | free fatty acid                 | FA(20:3)                       | 1.09 | 0.43 | 2.75 | 8.64E-01 | 8.4E-03 | 1.39 |
| 688 | sulfatide                       | Sulfatide (d18:1;/16:0(OH))    | 1.06 | 0.53 | 2.11 | 8.70E-01 | 2.6E-01 | 1.18 |
| 689 | lysophosphatidylcholine         | LPE(18:0) [sn1]                | 0.91 | 0.29 | 2.85 | 8.71E-01 | 1.1E-01 | 0.86 |
| 690 | monoalkyl diacylglycerol        | TG(O-50:3) [NL-18:2]           | 1.08 | 0.42 | 2.76 | 8.72E-01 | 3.7E-01 | 1.12 |
| 691 | cholesterol ester               | CE(22:1)                       | 1.06 | 0.55 | 2.02 | 8.72E-01 | 1.5E-01 | 1.27 |
| 692 | lysophosphatidylcholine         | LPC(16:0) [sn1]                | 0.88 | 0.19 | 4.07 | 8.74E-01 | 1.3E-01 | 0.88 |
| 693 | alkylphosphatidylethanolamine   | PE(O-18:0/20:4)                | 0.95 | 0.49 | 1.82 | 8.75E-01 | 6.7E-01 | 0.92 |
| 694 | ceramide                        | Cer(d18:2/22:0)                | 0.94 | 0.43 | 2.07 | 8.77E-01 | 1.2E-01 | 0.78 |
| 695 | cholesterol ester               | CE(24:1)                       | 0.94 | 0.42 | 2.12 | 8.78E-01 | 4.1E-03 | 1.38 |
| 696 | phosphatidylcholine             | PC(18:2_18:2)                  | 0.95 | 0.50 | 1.82 | 8.78E-01 | 9.6E-01 | 0.99 |
| 697 | phosphatidylinositol            | PI(17:0_18:1)                  | 1.05 | 0.56 | 1.98 | 8.79E-01 | 8.9E-01 | 1.02 |
| 698 | monohexosylceramide             | HexCer(d18:1/24:0)             | 0.93 | 0.37 | 2.37 | 8.82E-01 | 2.1E-01 | 1.15 |
| 699 | phosphatidylcholine             | PC(16:0_22:6)                  | 0.92 | 0.31 | 2.73 | 8.84E-01 | 2.8E-01 | 1.12 |
| 700 | lysophosphatidylcholine         | LPC(26:0) [sn2]                | 1.06 | 0.47 | 2.39 | 8.84E-01 | 8.1E-02 | 1.32 |
| 701 | lysophosphatidylcholine         | LPC(18:3) [sn1] (b)            | 0.96 | 0.51 | 1.79 | 8.86E-01 | 7.1E-02 | 0.70 |
| 702 | lysophosphatidylcholine         | LPC(20:0) [sn2]                | 0.93 | 0.36 | 2.42 | 8.87E-01 | 2.9E-01 | 1.10 |
| 703 | lysophosphatidylcholine         | LPC(16:0) [sn2]                | 1.11 | 0.25 | 5.06 | 8.88E-01 | 1.8E-01 | 0.90 |
| 704 | alkylphosphatidylcholine        | PC(O-18:0/18:1)                | 1.10 | 0.30 | 3.98 | 8.88E-01 | 2.6E-04 | 1.36 |
| 705 | phosphatidylcholine             | PC(17:0_18:1)                  | 1.12 | 0.21 | 5.94 | 8.93E-01 | 1.5E-01 | 1.09 |
| 706 | alkenylphosphatidylcholine      | PC(P-16:0/20:4)                | 1.07 | 0.38 | 3.03 | 8.94E-01 | 4.6E-01 | 1.10 |
| 707 | alkylphosphatidylcholine        | PC(O-36:5)                     | 0.96 | 0.50 | 1.84 | 8.95E-01 | 2.9E-01 | 1.20 |
| 708 | phosphatidylcholine             | PC(38:7)(c)                    | 0.94 | 0.34 | 2.55 | 8.97E-01 | 8.8E-01 | 1.02 |
| 709 | dihexosylceramide               | Hex2Cer(d18:1/24:1)            | 1.05 | 0.51 | 2.13 | 8.97E-01 | 2.2E-04 | 1.68 |
| 710 | cholesterol ester               | CE(24:6)                       | 1.04 | 0.57 | 1.91 | 8.99E-01 | 9.9E-01 | 1.00 |
| 711 | sphingosine-1-phosphate         | S1P(d18:0)                     | 1.06 | 0.39 | 2.88 | 9.01E-01 | 1.8E-01 | 1.18 |
| 712 | cholesterol ester               | CE(17:0)                       | 1.10 | 0.24 | 5.01 | 9.02E-01 | 6.1E-01 | 1.03 |
| 713 | alkenylphosphatidylethanolamine | PE(P-18:1/20:3) (b)            | 0.94 | 0.38 | 2.37 | 9.04E-01 | 2.1E-01 | 0.87 |
| 714 | alkenylphosphatidylcholine      | PC(P-18:1/22:6)                | 1.05 | 0.45 | 2.44 | 9.08E-01 | 1.9E-02 | 1.29 |
| 715 | alkenylphosphatidylethanolamine | PE(P-17:0/22:6) (a)            | 1.05 | 0.44 | 2.52 | 9.11E-01 | 8.1E-01 | 1.03 |
| 716 | monoalkyl diacylglycerol        | TG(O-54:2) [NL-17:1]           | 1.05 | 0.42 | 2.65 | 9.11E-01 | 2.5E-01 | 0.88 |
| 717 | lysophosphatidylcholine         | LPC(17:1) [sn2] (a)            | 0.94 | 0.28 | 3.12 | 9.13E-01 | 1.5E-01 | 0.84 |
| 718 | monoalkyl diacylglycerol        | TG(O-52:2) [SIM]               | 1.05 | 0.46 | 2.36 | 9.16E-01 | 1.1E-01 | 0.81 |
| 719 | lysophosphatidylcholine         | LPC(15:0) [sn2]                | 0.95 | 0.33 | 2.73 | 9.18E-01 | 2.2E-01 | 0.84 |
| 720 | lysoalkylphosphatidylcholine    | LPC(O-20:0)                    | 1.06 | 0.34 | 3.30 | 9.19E-01 | 3.5E-01 | 1.10 |
| 721 | alkenylphosphatidylethanolamine | PE(P-17:0/20:4) (b)            | 1.03 | 0.53 | 2.00 | 9.21E-01 | 8.6E-02 | 0.76 |
| 722 | lysoalkenylphosphatidylcholine  | LPC(P-16:0)                    | 1.07 | 0.26 | 4.50 | 9.23E-01 | 3.7E-01 | 0.95 |
| 723 | monoalkyl diacylglycerol        | TG(O-54:2) [SIM]               | 0.95 | 0.34 | 2.69 | 9.23E-01 | 1.2E-01 | 0.88 |
| 724 | phosphatidic acid               | PA(36:3)                       | 0.96 | 0.40 | 2.27 | 9.24E-01 | 5.2E-01 | 1.11 |
| 725 | sphingosine                     | Sph(d18:1)                     | 1.05 | 0.39 | 2.80 | 9.24E-01 | 9.0E-02 | 1.23 |
| 726 | ceramide                        | Cer(d16:1/20:0)                | 1.04 | 0.48 | 2.24 | 9.25E-01 | 2.7E-01 | 0.84 |
| 727 | alkenylphosphatidylcholine      | PC(P-36:3)                     | 1.10 | 0.14 | 8.39 | 9.26E-01 | 3.1E-01 | 1.07 |
| 728 | ceramide                        | Cer(d16:1/16:0)                | 0.96 | 0.43 | 2.17 | 9.27E-01 | 9.9E-01 | 1.00 |
| 729 | alkenylphosphatidylethanolamine | PE(P-20:1/22:6)                | 1.02 | 0.62 | 1.69 | 9.27E-01 | 9.5E-02 | 1.48 |
| 730 | lysophosphatidylcholine         | LPC(22:5) (n3) [sn1] [104_sn1] | 0.97 | 0.54 | 1.76 | 9.31E-01 | 6.9E-01 | 0.92 |
| 731 | phosphatidylcholine             | PC(16:1_22:6)                  | 0.97 | 0.46 | 2.04 | 9.35E-01 | 9.7E-01 | 0.99 |
| 732 | lysophosphatidylcholine         | LPC(22:0) [sn2]                | 0.96 | 0.40 | 2.31 | 9.35E-01 | 8.0E-01 | 0.98 |
| 733 | phosphatidylinositol            | PI(18:0_20:3) (a)              | 1.04 | 0.39 | 2.76 | 9.38E-01 | 7.2E-01 | 0.95 |

|     |                                 |                                |      |      |      |          |         |      |
|-----|---------------------------------|--------------------------------|------|------|------|----------|---------|------|
| 734 | alkenylphosphatidylethanolamine | PE(P-20:0/18:2)                | 0.97 | 0.39 | 2.39 | 9.41E-01 | 2.7E-01 | 1.12 |
| 735 | alkenylphosphatidylethanolamine | PE(P-17:0/20:4) (a)            | 0.98 | 0.53 | 1.79 | 9.42E-01 | 1.5E-01 | 0.79 |
| 736 | phosphatidylinositol            | PI(15-MHDA_20:4)\PI(17:0_2     | 1.04 | 0.32 | 3.36 | 9.44E-01 | 2.1E-01 | 0.87 |
| 737 | alkylphosphatidylcholine        | PC(O-32:1)                     | 1.05 | 0.28 | 3.87 | 9.44E-01 | 9.3E-02 | 1.18 |
| 738 | triacylglycerol                 | TG(56:8) [NL-20:5]             | 1.03 | 0.42 | 2.56 | 9.48E-01 | 8.1E-01 | 0.97 |
| 739 | triacylglycerol                 | TG(56:8) [NL-20:4]             | 0.98 | 0.53 | 1.80 | 9.48E-01 | 2.5E-01 | 0.84 |
| 740 | lysalkylphosphatidylcholine     | LPC(O-18:0)                    | 1.05 | 0.26 | 4.22 | 9.50E-01 | 3.5E-01 | 1.08 |
| 741 | ceramide                        | Cer(d17:1/22:0)                | 1.02 | 0.50 | 2.10 | 9.51E-01 | 2.3E-01 | 0.80 |
| 742 | phosphatidylcholine             | PC(15:0_20:4)                  | 1.03 | 0.43 | 2.45 | 9.54E-01 | 8.2E-01 | 0.97 |
| 743 | sphingomyelin                   | SM(d16:1/23:0)/SM(d17:1/2      | 1.04 | 0.29 | 3.76 | 9.58E-01 | 1.7E-01 | 1.14 |
| 744 | triacylglycerol                 | TG(56:7) [NL-22:5](b)          | 1.02 | 0.49 | 2.12 | 9.65E-01 | 5.5E-01 | 1.09 |
| 745 | triacylglycerol                 | TG(56:7) [NL-22:5](a)          | 1.02 | 0.49 | 2.11 | 9.65E-01 | 5.5E-01 | 1.09 |
| 746 | alkenylphosphatidylethanolamine | PE(P-18:0/22:6)                | 1.02 | 0.41 | 2.51 | 9.67E-01 | 8.2E-01 | 0.97 |
| 747 | lysalkylphosphatidylcholine     | LPC(O-22:1)                    | 1.02 | 0.41 | 2.54 | 9.69E-01 | 2.1E-02 | 1.29 |
| 748 | lysophosphatidylcholine         | LPC(18:0) [sn2]                | 0.97 | 0.23 | 4.16 | 9.70E-01 | 1.7E-01 | 0.89 |
| 749 | lysophosphatidylcholine         | LPC(17:1) [sn1] (a) / LPC(17:2 | 0.97 | 0.24 | 3.91 | 9.71E-01 | 3.1E-01 | 0.89 |
| 750 | phosphatidylinositol            | PI(38:5) (b)                   | 0.98 | 0.29 | 3.29 | 9.76E-01 | 5.6E-01 | 0.94 |
| 751 | alkenylphosphatidylethanolamine | PE(P-15:0/20:4) (b)            | 0.99 | 0.60 | 1.63 | 9.77E-01 | 1.1E-03 | 0.62 |
| 752 | alkylphosphatidylcholine        | PC(O-36:0)                     | 0.98 | 0.33 | 2.93 | 9.77E-01 | 2.0E-02 | 1.29 |
| 753 | alkenylphosphatidylcholine      | PC(P-18:0/22:6)                | 1.02 | 0.34 | 3.06 | 9.78E-01 | 2.0E-01 | 1.12 |
| 754 | sphingomyelin                   | SM(d18:1/20:0)/SM(d16:1/2      | 0.98 | 0.15 | 6.34 | 9.81E-01 | 7.0E-02 | 1.15 |
| 755 | lysophosphatidylcholine         | LPC(20:5) [sn1]                | 0.99 | 0.56 | 1.76 | 9.82E-01 | 8.9E-01 | 0.97 |
| 756 | alkenylphosphatidylethanolamine | PE(P-20:0/22:6)                | 0.99 | 0.47 | 2.09 | 9.85E-01 | 7.3E-02 | 1.28 |
| 757 | triacylglycerol                 | TG(54:3) [NL-18:2]             | 1.01 | 0.55 | 1.84 | 9.86E-01 | 7.7E-01 | 0.95 |
| 758 | lysophosphatidylcholine         | LPC(22:5) [sn2] (n3)           | 0.99 | 0.44 | 2.26 | 9.88E-01 | 9.2E-01 | 0.98 |
| 759 | lysophosphatidylinositol        | LPI(18:0) [sn1]                | 1.01 | 0.37 | 2.71 | 9.89E-01 | 3.8E-01 | 1.12 |
| 760 | lysophosphatidylcholine         | LPC(18:0) [sn1]                | 0.99 | 0.16 | 6.14 | 9.89E-01 | 2.6E-01 | 0.92 |
| 761 | dihexosylceramide               | Hex2Cer(d18:1/16:0)            | 0.99 | 0.32 | 3.06 | 9.89E-01 | 8.3E-04 | 1.35 |
| 762 | ceramide                        | Cer(d17:1/23:0)                | 1.00 | 0.54 | 1.88 | 9.90E-01 | 2.7E-01 | 0.78 |
| 763 | lysophosphatidylcholine         | LPC(20:5) [sn2]                | 1.00 | 0.56 | 1.79 | 9.91E-01 | 7.8E-01 | 0.94 |
| 764 | alkenylphosphatidylethanolamine | PE(P-16:0/20:3) (b)            | 1.00 | 0.41 | 2.47 | 9.92E-01 | 9.4E-03 | 0.72 |
| 765 | lysophosphatidylcholine         | LPC(19:1) (b)                  | 0.99 | 0.20 | 4.97 | 9.93E-01 | 8.5E-01 | 1.01 |
| 766 | ceramide                        | Cer(d18:2/24:0)                | 1.00 | 0.45 | 2.22 | 9.94E-01 | 2.1E-01 | 0.84 |
| 767 | monoalkyldiacylglycerol         | TG(O-54:3) [SIM]               | 1.00 | 0.34 | 2.96 | 9.96E-01 | 9.2E-01 | 0.99 |
| 768 | sphingomyelin                   | SM(d16:1/24:1)                 | 1.00 | 0.38 | 2.66 | 9.97E-01 | 2.3E-03 | 1.38 |
| 769 | alkylphosphatidylethanolamine   | PE(O-36:5)                     | 1.00 | 0.65 | 1.53 | 9.97E-01 | 6.1E-01 | 1.11 |
| 770 | triacylglycerol                 | TG(56:6) [NL-22:5](b)          | 1.00 | 0.48 | 2.10 | 9.98E-01 | 2.2E-01 | 1.17 |
| 771 | triacylglycerol                 | TG(56:6) [NL-22:5](a)          | 1.00 | 0.48 | 2.11 | 9.98E-01 | 2.2E-01 | 1.17 |
| 772 | sulfatide                       | Sulfatide (d18:1/24:0)         | 1.00 | 0.63 | 1.58 | 9.99E-01 | 9.8E-01 | 1.00 |

List C. Lipids associated with overall survival in mCRPC

| cox regression rank | Lipid type                      | Lipid name                    | Hazard ratio | lower 95% CI | upper 95% CI | Hazard ratio P-value | t-test Profile C2 vs others, P-value | fold, Profile C2/others |
|---------------------|---------------------------------|-------------------------------|--------------|--------------|--------------|----------------------|--------------------------------------|-------------------------|
| 1                   | acylcarnitine                   | AC(14:1)                      | 1.77         | 1.45         | 2.17         | 6.25E-08             | 1.2E-09                              | 1.83                    |
| 2                   | acylcarnitine                   | AC(14:2)                      | 2.09         | 1.60         | 2.74         | 8.02E-08             | 5.0E-09                              | 1.59                    |
| 3                   | acylcarnitine                   | AC(18:1)                      | 3.03         | 2.07         | 4.43         | 9.23E-08             | 1.0E-08                              | 1.34                    |
| 4                   | ceramide                        | Cer(d19:1/16:0)               | 1.92         | 1.48         | 2.49         | 3.65E-07             | 3.9E-09                              | 1.66                    |
| 5                   | acylcarnitine                   | AC(16:1)                      | 2.10         | 1.60         | 2.76         | 3.67E-07             | 2.4E-09                              | 1.53                    |
| 6                   | lysophosphatidylcholine         | LPC(14:0) [sn1]               | 0.33         | 0.22         | 0.50         | 3.93E-07             | 4.2E-09                              | 0.75                    |
| 7                   | sphingomyelin                   | SM(38:3) (a)                  | 3.20         | 2.01         | 5.10         | 5.62E-07             | 7.1E-17                              | 1.45                    |
| 8                   | sphingomyelin                   | SM(d19:1/24:1)                | 3.04         | 1.94         | 4.77         | 5.96E-07             | 4.7E-15                              | 1.45                    |
| 9                   | acylcarnitine                   | AC(14:0)                      | 2.16         | 1.62         | 2.87         | 6.56E-07             | 4.4E-06                              | 1.38                    |
| 10                  | acylcarnitine                   | AC(12:0)                      | 1.67         | 1.37         | 2.04         | 7.27E-07             | 6.4E-07                              | 1.69                    |
| 11                  | ceramide                        | Cer(d19:1/18:0)               | 1.60         | 1.32         | 1.95         | 8.26E-07             | 7.1E-09                              | 1.95                    |
| 12                  | lysophosphatidylcholine         | LPC(14:0) [sn2]               | 0.35         | 0.23         | 0.53         | 1.00E-06             | 6.3E-09                              | 0.74                    |
| 13                  | phosphatidylcholine             | PC(34:5)                      | 0.56         | 0.44         | 0.70         | 1.00E-06             | 9.9E-10                              | 0.57                    |
| 14                  | dihexosylceramide               | Hex2Cer(d18:1/20:0)           | 3.02         | 1.93         | 4.72         | 1.35E-06             | 1.1E-08                              | 1.36                    |
| 15                  | ceramide                        | Cer(d19:1/20:0)               | 1.81         | 1.42         | 2.31         | 1.37E-06             | 2.9E-09                              | 1.70                    |
| 16                  | deoxyceramide                   | Cer(m18:0/24:0)               | 0.47         | 0.35         | 0.64         | 1.54E-06             | 2.6E-07                              | 0.65                    |
| 17                  | ceramide                        | Cer(d19:1/24:1)               | 2.20         | 1.58         | 3.06         | 1.86E-06             | 1.3E-10                              | 1.51                    |
| 18                  | sphingomyelin                   | SM(d16:1/19:0)                | 3.86         | 2.13         | 6.98         | 2.73E-06             | 8.8E-17                              | 1.34                    |
| 19                  | acylcarnitine                   | AC(18:0)                      | 3.00         | 1.95         | 4.60         | 2.91E-06             | 7.1E-07                              | 1.27                    |
| 20                  | sphingomyelin                   | SM(d18:2/18:1)                | 4.09         | 2.26         | 7.42         | 3.29E-06             | 3.9E-12                              | 1.27                    |
| 21                  | triacylglycerol                 | TG(50:4) [NL-20:4]            | 0.68         | 0.57         | 0.80         | 3.54E-06             | 2.7E-16                              | 0.35                    |
| 22                  | acylcarnitine                   | AC(16:0)                      | 2.95         | 1.91         | 4.55         | 1.01E-05             | 6.3E-06                              | 1.23                    |
| 23                  | trihexosylceramide              | Hex3Cer(d18:1/16:0)           | 3.19         | 1.90         | 5.37         | 1.17E-05             | 9.8E-13                              | 1.34                    |
| 24                  | sphingomyelin                   | SM(40:3) (a)                  | 2.82         | 1.78         | 4.45         | 1.53E-05             | 1.7E-15                              | 1.38                    |
| 25                  | phosphatidylcholine             | PC(14:0_20:4)                 | 0.45         | 0.32         | 0.65         | 1.61E-05             | 2.8E-08                              | 0.73                    |
| 26                  | triacylglycerol                 | TG(52:5) [NL-20:5]            | 0.62         | 0.49         | 0.78         | 1.89E-05             | 7.4E-12                              | 0.50                    |
| 27                  | acylcarnitine                   | AC(17:0)                      | 2.07         | 1.52         | 2.81         | 1.95E-05             | 9.9E-08                              | 1.39                    |
| 28                  | acylcarnitine                   | AC(15:0)                      | 2.01         | 1.46         | 2.76         | 2.84E-05             | 1.2E-06                              | 1.35                    |
| 29                  | sphingomyelin                   | SM(37:2)                      | 3.08         | 1.80         | 5.26         | 3.17E-05             | 2.1E-17                              | 1.39                    |
| 30                  | ceramide                        | Cer(m18:1/24:1)               | 3.19         | 1.88         | 5.40         | 4.22E-05             | 1.6E-07                              | 1.22                    |
| 31                  | ceramide                        | Cer(d17:1/18:0)               | 2.18         | 1.50         | 3.18         | 4.72E-05             | 6.7E-06                              | 1.29                    |
| 32                  | ceramide                        | Cer(d17:1/16:0)               | 2.92         | 1.74         | 4.92         | 4.77E-05             | 5.5E-06                              | 1.21                    |
| 33                  | deoxyceramide                   | Cer(m18:0/22:0)               | 0.53         | 0.39         | 0.73         | 4.78E-05             | 2.9E-08                              | 0.65                    |
| 34                  | sphingomyelin                   | SM(38:3) (b)                  | 1.97         | 1.42         | 2.74         | 5.13E-05             | 6.0E-13                              | 1.60                    |
| 35                  | sphingomyelin                   | SM(35:2) (b)                  | 3.39         | 1.89         | 6.10         | 5.27E-05             | 2.7E-18                              | 1.33                    |
| 36                  | sphingomyelin                   | SM(d18:2/18:0)                | 2.57         | 1.64         | 4.02         | 5.34E-05             | 7.2E-15                              | 1.42                    |
| 37                  | deoxyceramide                   | Cer(m18:0/23:0)               | 0.54         | 0.40         | 0.73         | 5.38E-05             | 4.1E-07                              | 0.65                    |
| 38                  | sphingomyelin                   | SM(d17:1/16:0)                | 3.70         | 1.94         | 7.05         | 5.52E-05             | 1.0E-10                              | 1.23                    |
| 39                  | acylcarnitine                   | AC(18:2)                      | 1.81         | 1.36         | 2.40         | 5.89E-05             | 1.3E-06                              | 1.41                    |
| 40                  | ceramide                        | Cer(d18:1/16:0)               | 3.80         | 2.02         | 7.14         | 6.08E-05             | 4.5E-07                              | 1.16                    |
| 41                  | phosphatidylcholine             | PC(16:0_18:3) (b)             | 0.37         | 0.22         | 0.61         | 6.27E-05             | 8.5E-08                              | 0.80                    |
| 42                  | sphingomyelin                   | SM(d18:2/17:0)                | 3.12         | 1.76         | 5.52         | 6.55E-05             | 4.7E-14                              | 1.31                    |
| 43                  | ceramide                        | Cer(d18:1/21:0)               | 2.62         | 1.62         | 4.26         | 7.53E-05             | 3.0E-04                              | 1.19                    |
| 44                  | triacylglycerol                 | TG(48:0) [NL-16:0]            | 0.68         | 0.56         | 0.83         | 7.66E-05             | 1.5E-15                              | 0.43                    |
| 45                  | sphingomyelin                   | SM(34:3)                      | 3.47         | 1.84         | 6.52         | 8.11E-05             | 1.8E-09                              | 1.23                    |
| 46                  | ceramide                        | Cer(d19:1/22:0)               | 1.85         | 1.35         | 2.52         | 8.23E-05             | 1.2E-05                              | 1.36                    |
| 47                  | sphingomyelin                   | SM(d17:1/24:1)                | 3.82         | 1.95         | 7.48         | 9.41E-05             | 1.6E-16                              | 1.28                    |
| 48                  | phosphatidylinositol            | PI(16:0_20:3) (b)             | 0.49         | 0.34         | 0.71         | 9.80E-05             | 1.2E-07                              | 0.74                    |
| 49                  | ceramide                        | Cer(d18:1/19:0)               | 1.70         | 1.29         | 2.22         | 1.05E-04             | 1.1E-07                              | 1.54                    |
| 50                  | alkenylphosphatidylethanolamine | PE(P-18:1/20:5) (a)           | 0.62         | 0.49         | 0.80         | 1.08E-04             | 3.2E-04                              | 0.70                    |
| 51                  | alkenylphosphatidylethanolamine | PE(P-18:0/20:5)               | 0.61         | 0.47         | 0.79         | 1.12E-04             | 3.0E-04                              | 0.71                    |
| 52                  | phosphatidylcholine             | PC(32:2)                      | 0.43         | 0.28         | 0.66         | 1.20E-04             | 4.2E-06                              | 0.80                    |
| 53                  | alkenylphosphatidylethanolamine | PE(P-16:0/20:5)               | 0.63         | 0.50         | 0.81         | 1.25E-04             | 2.0E-04                              | 0.68                    |
| 54                  | sphingomyelin                   | SM(43:2) (b)                  | 3.58         | 1.86         | 6.91         | 1.51E-04             | 1.4E-16                              | 1.29                    |
| 55                  | sphingomyelin                   | SM(40:3) (b)                  | 2.31         | 1.49         | 3.58         | 1.52E-04             | 1.5E-15                              | 1.44                    |
| 56                  | phosphatidylcholine             | PC(14:0_16:0)                 | 0.50         | 0.35         | 0.72         | 1.52E-04             | 5.6E-05                              | 0.78                    |
| 57                  | GM3 ganglioside                 | GM3(d18:1/16:0)               | 2.65         | 1.62         | 4.35         | 1.68E-04             | 2.0E-14                              | 1.38                    |
| 58                  | ceramide                        | Cer(d17:1/20:0)               | 1.85         | 1.33         | 2.58         | 1.86E-04             | 1.0E-03                              | 1.25                    |
| 59                  | sphingomyelin                   | SM(d18:1/24:1)                | 3.03         | 1.71         | 5.36         | 1.87E-04             | 8.8E-17                              | 1.33                    |
| 60                  | trihexosylceramide              | Hex3Cer(d18:1/24:1)           | 2.31         | 1.49         | 3.60         | 2.08E-04             | 3.4E-11                              | 1.37                    |
| 61                  | ceramide                        | Cer(d18:2/16:0)               | 2.41         | 1.50         | 3.85         | 2.13E-04             | 3.4E-07                              | 1.25                    |
| 62                  | triacylglycerol                 | TG(48:1) [SIM]                | 0.62         | 0.48         | 0.81         | 2.25E-04             | 3.0E-14                              | 0.53                    |
| 63                  | sphingomyelin                   | SM(d18:1/17:0)/SM(d17:1/17:0) | 2.13         | 1.41         | 3.22         | 2.62E-04             | 2.6E-15                              | 1.48                    |
| 64                  | phosphatidylcholine             | PC(18:2_20:5)                 | 0.59         | 0.44         | 0.79         | 2.71E-04             | 2.1E-05                              | 0.71                    |
| 65                  | sphingomyelin                   | SM(d18:2/20:0)                | 3.45         | 1.73         | 6.88         | 2.80E-04             | 7.2E-12                              | 1.25                    |
| 66                  | phosphatidylcholine             | PC(28:0)                      | 0.69         | 0.56         | 0.85         | 2.86E-04             | 2.8E-06                              | 0.60                    |
| 67                  | phosphatidylcholine             | PC(40:7) (a)                  | 0.46         | 0.30         | 0.69         | 3.15E-04             | 2.0E-04                              | 0.82                    |
| 68                  | triacylglycerol                 | TG(48:0) [NL-18:0]            | 0.72         | 0.60         | 0.86         | 3.36E-04             | 1.6E-11                              | 0.44                    |
| 69                  | dihexosylceramide               | Hex2Cer(d18:1/24:1)           | 2.09         | 1.40         | 3.12         | 3.38E-04             | 2.8E-10                              | 1.42                    |
| 70                  | sphingomyelin                   | SM(44:3)                      | 2.77         | 1.59         | 4.84         | 3.58E-04             | 1.2E-14                              | 1.32                    |
| 71                  | triacylglycerol                 | TG(52:5) [NL-20:4]            | 0.68         | 0.55         | 0.84         | 3.64E-04             | 5.0E-10                              | 0.54                    |
| 72                  | sphingomyelin                   | SM(37:1)                      | 2.35         | 1.45         | 3.83         | 3.66E-04             | 8.4E-11                              | 1.34                    |
| 73                  | triacylglycerol                 | TG(48:3) [NL-18:3]            | 0.75         | 0.64         | 0.88         | 3.69E-04             | 6.2E-21                              | 0.30                    |
| 74                  | sphingomyelin                   | SM(d18:1/18:0)/SM(d16:1/20:0) | 3.53         | 1.75         | 7.11         | 3.71E-04             | 1.3E-13                              | 1.26                    |
| 75                  | monohexosylceramide             | HexCer(d18:1/16:0)            | 2.19         | 1.42         | 3.38         | 3.75E-04             | 3.7E-08                              | 1.33                    |
| 76                  | triacylglycerol                 | TG(48:0) [SIM]                | 0.70         | 0.57         | 0.86         | 3.92E-04             | 1.7E-13                              | 0.48                    |
| 77                  | phosphatidylcholine             | PC(14:0_22:6)                 | 0.53         | 0.38         | 0.76         | 3.97E-04             | 4.3E-08                              | 0.71                    |
| 78                  | phosphatidylcholine             | PC(32:1)                      | 0.51         | 0.35         | 0.75         | 4.02E-04             | 7.5E-04                              | 0.82                    |

|     |                                 |                               |      |      |       |          |         |      |
|-----|---------------------------------|-------------------------------|------|------|-------|----------|---------|------|
| 79  | sphingomyelin                   | SM(d18:1/16:0)                | 4.57 | 1.97 | 10.63 | 4.05E-04 | 2.3E-17 | 1.23 |
| 80  | ceramide                        | Cer(d18:1/18:0)               | 1.99 | 1.36 | 2.92  | 4.71E-04 | 3.0E-07 | 1.31 |
| 81  | triacylglycerol                 | TG(50:3) [NL-18:3]            | 0.65 | 0.50 | 0.83  | 4.80E-04 | 5.3E-14 | 0.54 |
| 82  | dihexosylceramide               | Hex2Cer(d18:1/22:0)           | 2.16 | 1.41 | 3.32  | 4.98E-04 | 4.3E-05 | 1.25 |
| 83  | phosphatidylcholine             | PC(16:0_20:3) (b)             | 0.51 | 0.34 | 0.76  | 6.58E-04 | 8.9E-03 | 0.87 |
| 84  | lysophosphatidylcholine         | LPC(18:3) [sn1] (b)           | 0.64 | 0.49 | 0.82  | 7.45E-04 | 2.7E-05 | 0.73 |
| 85  | free fatty acid                 | FA(18:1)                      | 1.36 | 1.13 | 1.63  | 7.56E-04 | 5.6E-04 | 1.52 |
| 86  | alkenylphosphatidylcholine      | PC(P-16:0/18:0)               | 2.80 | 1.56 | 5.00  | 7.64E-04 | 1.1E-12 | 1.27 |
| 87  | phosphatidylcholine             | PC(36:6) (a)                  | 0.63 | 0.48 | 0.83  | 7.98E-04 | 3.3E-05 | 0.70 |
| 88  | ceramide                        | Cer(d17:1/24:1)               | 2.16 | 1.37 | 3.43  | 8.45E-04 | 2.8E-03 | 1.16 |
| 89  | triacylglycerol                 | TG(52:4) [NL-16:1]            | 1.60 | 1.21 | 2.12  | 8.60E-04 | 1.6E-01 | 1.11 |
| 90  | alkylphosphatidylcholine        | PC(O-34:1)                    | 2.78 | 1.54 | 5.00  | 8.64E-04 | 1.8E-10 | 1.24 |
| 91  | trihexosylceramide              | Hex3Cer(d18:1/18:0)           | 1.88 | 1.28 | 2.76  | 8.78E-04 | 4.5E-08 | 1.38 |
| 92  | free fatty acid                 | FA(22:4)                      | 1.75 | 1.26 | 2.43  | 9.44E-04 | 4.3E-05 | 1.30 |
| 93  | phosphatidylinositol            | PI(16:0_20:4)                 | 0.47 | 0.30 | 0.73  | 1.00E-03 | 1.0E-08 | 0.78 |
| 94  | phosphatidylcholine             | PC(16:0_20:5)                 | 0.57 | 0.40 | 0.81  | 1.20E-03 | 3.5E-04 | 0.78 |
| 95  | alkylphosphatidylethanolamine   | PE(O-16:0/20:3)               | 0.55 | 0.37 | 0.79  | 1.22E-03 | 2.8E-01 | 0.93 |
| 96  | phosphatidylinositol            | PI(16:0_16:1)                 | 0.71 | 0.57 | 0.88  | 1.27E-03 | 1.3E-04 | 0.69 |
| 97  | ceramide                        | Cer(d19:1/23:0)               | 1.70 | 1.22 | 2.37  | 1.40E-03 | 1.3E-03 | 1.24 |
| 98  | triacylglycerol                 | TG(48:2) [SIM]                | 0.69 | 0.54 | 0.87  | 1.42E-03 | 1.3E-14 | 0.51 |
| 99  | ceramide                        | Cer(d18:1/20:0)               | 2.20 | 1.35 | 3.59  | 1.52E-03 | 8.5E-05 | 1.19 |
| 100 | triacylglycerol                 | TG(48:2) [NL-18:2]            | 0.70 | 0.56 | 0.87  | 1.57E-03 | 1.8E-15 | 0.49 |
| 101 | triacylglycerol                 | TG(54:3) [NL-18:1]            | 1.66 | 1.21 | 2.27  | 1.58E-03 | 4.8E-01 | 1.05 |
| 102 | alkenylphosphatidylethanolamine | PE(P-18:1/20:5) (b)           | 0.75 | 0.62 | 0.90  | 1.59E-03 | 6.9E-04 | 0.65 |
| 103 | triacylglycerol                 | TG(48:1) [NL-18:1]            | 0.69 | 0.54 | 0.87  | 1.61E-03 | 7.2E-13 | 0.53 |
| 104 | alkylphosphatidylethanolamine   | PE(O-36:5)                    | 0.68 | 0.53 | 0.87  | 1.65E-03 | 2.7E-03 | 0.74 |
| 105 | triacylglycerol                 | TG(50:0) [SIM]                | 0.74 | 0.61 | 0.90  | 1.74E-03 | 3.9E-13 | 0.45 |
| 106 | phosphatidylserine              | PS(38:4)                      | 3.20 | 1.57 | 6.52  | 1.75E-03 | 1.5E-03 | 1.10 |
| 107 | phosphatidylcholine             | PC(38:6) (a)                  | 0.40 | 0.23 | 0.70  | 1.83E-03 | 1.3E-03 | 0.88 |
| 108 | phosphatidylcholine             | PC(35:5)                      | 0.63 | 0.47 | 0.84  | 1.85E-03 | 6.8E-05 | 0.72 |
| 109 | free fatty acid                 | FA(16:0)                      | 1.95 | 1.28 | 2.97  | 1.91E-03 | 5.6E-04 | 1.20 |
| 110 | triacylglycerol                 | TG(52:3) [NL-16:1]            | 1.66 | 1.21 | 2.28  | 1.93E-03 | 7.9E-02 | 1.11 |
| 111 | alkenylphosphatidylcholine      | PC(P-16:0/20:5)               | 0.64 | 0.48 | 0.86  | 2.01E-03 | 5.7E-02 | 0.85 |
| 112 | deoxyceramide                   | Cer(m18:1/24:0)               | 0.66 | 0.51 | 0.86  | 2.05E-03 | 3.9E-06 | 0.66 |
| 113 | sphingomyelin                   | SM(44:2)                      | 2.18 | 1.33 | 3.57  | 2.12E-03 | 5.9E-15 | 1.37 |
| 114 | sphingomyelin                   | SM(d18:2/16:0)                | 3.49 | 1.59 | 7.65  | 2.13E-03 | 2.4E-09 | 1.16 |
| 115 | trihexosylceramide              | Hex3Cer(d18:1/20:0)           | 1.68 | 1.20 | 2.33  | 2.33E-03 | 2.2E-06 | 1.35 |
| 116 | triacylglycerol                 | TG(48:2) [NL-14:0]            | 0.71 | 0.57 | 0.89  | 2.42E-03 | 1.8E-13 | 0.51 |
| 117 | triacylglycerol                 | TG(50:0) [NL-18:0]            | 0.76 | 0.64 | 0.91  | 2.50E-03 | 6.2E-13 | 0.43 |
| 118 | lysophosphatidylcholine         | LPC(20:5) [sn2]               | 0.66 | 0.49 | 0.87  | 2.63E-03 | 6.3E-04 | 0.75 |
| 119 | alkenylphosphatidylethanolamine | PE(P-16:0/20:3) (b)           | 0.69 | 0.54 | 0.87  | 2.63E-03 | 5.0E-01 | 0.95 |
| 120 | lysophosphatidylcholine         | LPC(20:3) [sn2]               | 0.47 | 0.29 | 0.77  | 2.77E-03 | 1.7E-03 | 0.87 |
| 121 | triacylglycerol                 | TG(48:2) [NL-14:1]            | 0.76 | 0.63 | 0.91  | 2.79E-03 | 5.1E-11 | 0.48 |
| 122 | triacylglycerol                 | TG(48:1) [NL-16:1]            | 0.77 | 0.64 | 0.92  | 2.82E-03 | 6.6E-09 | 0.51 |
| 123 | phosphatidylinositol            | PI(34:1)                      | 0.56 | 0.38 | 0.82  | 2.88E-03 | 2.6E-04 | 0.82 |
| 124 | alkylphosphatidylcholine        | PC(O-18:0/18:1)               | 2.67 | 1.41 | 5.03  | 2.89E-03 | 3.9E-10 | 1.22 |
| 125 | alkenylphosphatidylethanolamine | PE(P-18:0/20:3) (b)           | 0.68 | 0.53 | 0.88  | 2.91E-03 | 8.1E-01 | 0.98 |
| 126 | trihexosylceramide              | Hex3Cer(d18:1/22:0)           | 1.75 | 1.20 | 2.54  | 2.95E-03 | 7.2E-07 | 1.34 |
| 127 | alkenylphosphatidylethanolamine | PE(P-17:0/20:4) (b)           | 0.70 | 0.55 | 0.88  | 3.13E-03 | 1.8E-01 | 0.89 |
| 128 | lysophosphatidylcholine         | LPC(18:3) [sn1] (a)/LPC(18:3) | 0.73 | 0.59 | 0.90  | 3.26E-03 | 6.6E-04 | 0.72 |
| 129 | alkylphosphatidylethanolamine   | PE(O-16:0/22:6)               | 0.62 | 0.45 | 0.85  | 3.48E-03 | 9.7E-03 | 0.83 |
| 130 | ceramide                        | Cer(d20:1/24:1)               | 1.66 | 1.19 | 2.34  | 3.65E-03 | 3.5E-07 | 1.39 |
| 131 | alkenylphosphatidylethanolamine | PE(P-16:0/22:5) (n3)          | 0.54 | 0.35 | 0.82  | 3.77E-03 | 6.7E-02 | 0.91 |
| 132 | sphingomyelin                   | SM(d18:0/16:0)                | 1.94 | 1.24 | 3.05  | 3.81E-03 | 2.2E-10 | 1.35 |
| 133 | triacylglycerol                 | TG(49:1) [NL-17:1]            | 0.71 | 0.56 | 0.90  | 3.86E-03 | 8.0E-10 | 0.58 |
| 134 | alkenylphosphatidylethanolamine | PE(P-16:0/18:2)               | 0.57 | 0.40 | 0.83  | 3.86E-03 | 3.5E-01 | 0.95 |
| 135 | alkenylphosphatidylethanolamine | PE(P-18:1/20:3) (b)           | 0.69 | 0.53 | 0.89  | 3.94E-03 | 4.9E-01 | 0.95 |
| 136 | lysophosphatidylcholine         | LPC(16:1) [sn2]               | 0.53 | 0.34 | 0.82  | 4.08E-03 | 6.1E-02 | 0.91 |
| 137 | alkylphosphatidylethanolamine   | PE(O-34:1)                    | 0.56 | 0.37 | 0.84  | 4.28E-03 | 5.6E-02 | 0.90 |
| 138 | alkylphosphatidylethanolamine   | PE(O-38:5) (a)                | 0.63 | 0.45 | 0.87  | 4.50E-03 | 2.4E-01 | 0.92 |
| 139 | sphingomyelin                   | SM(d16:1/24:1)                | 1.92 | 1.22 | 3.03  | 4.52E-03 | 2.9E-10 | 1.32 |
| 140 | triacylglycerol                 | TG(48:3) [NL-14:0]            | 0.78 | 0.66 | 0.93  | 4.53E-03 | 5.0E-17 | 0.36 |
| 141 | alkylphosphatidylcholine        | PC(O-18:1/18:1)               | 1.93 | 1.23 | 3.03  | 4.59E-03 | 2.2E-10 | 1.34 |
| 142 | ceramide                        | Cer(d18:2/24:1)               | 1.90 | 1.21 | 2.96  | 4.63E-03 | 1.6E-02 | 1.13 |
| 143 | deoxyceramide                   | Cer(m18:0/20:0)               | 0.67 | 0.50 | 0.88  | 4.83E-03 | 9.1E-06 | 0.71 |
| 144 | free fatty acid                 | FA(18:2)                      | 1.30 | 1.08 | 1.56  | 4.88E-03 | 5.0E-03 | 1.40 |
| 145 | monohexosylceramide             | HexCer(d18:1/24:1)            | 1.93 | 1.22 | 3.05  | 4.90E-03 | 2.2E-08 | 1.30 |
| 146 | lysophosphatidylcholine         | LPC(20:5) [sn1]               | 0.69 | 0.53 | 0.90  | 5.02E-03 | 2.0E-03 | 0.77 |
| 147 | dihexosylceramide               | Hex2Cer(d16:1/24:1)           | 1.59 | 1.15 | 2.19  | 5.06E-03 | 1.2E-06 | 1.39 |
| 148 | alkenylphosphatidylethanolamine | PE(P-16:0/20:4)               | 0.62 | 0.44 | 0.86  | 5.16E-03 | 1.5E-01 | 0.91 |
| 149 | triacylglycerol                 | TG(49:1) [NL-16:1]            | 0.66 | 0.48 | 0.90  | 5.34E-03 | 1.6E-07 | 0.69 |
| 150 | triacylglycerol                 | TG(48:2) [NL-16:1]            | 0.76 | 0.62 | 0.93  | 5.47E-03 | 1.1E-08 | 0.56 |
| 151 | alkylphosphatidylcholine        | PC(O-34:4)                    | 0.45 | 0.26 | 0.80  | 5.55E-03 | 3.9E-01 | 0.97 |
| 152 | alkenylphosphatidylethanolamine | PE(P-19:0/20:4) (b)           | 0.70 | 0.54 | 0.90  | 5.74E-03 | 2.6E-01 | 0.92 |
| 153 | phosphatidylinositol            | PI(20:0_20:4)                 | 0.59 | 0.41 | 0.86  | 5.78E-03 | 9.1E-10 | 0.70 |
| 154 | ceramide                        | Cer(d18:2/20:0)               | 1.79 | 1.17 | 2.75  | 5.93E-03 | 7.0E-03 | 1.15 |
| 155 | monohexosylceramide             | HexCer(d18:2/20:0)            | 1.82 | 1.16 | 2.85  | 6.04E-03 | 3.6E-03 | 1.17 |
| 156 | alkenylphosphatidylethanolamine | PE(P-16:0/20:3) (a)           | 0.68 | 0.51 | 0.90  | 6.27E-03 | 1.4E-01 | 0.89 |
| 157 | triacylglycerol                 | TG(54:6) [NL-20:5]            | 0.70 | 0.54 | 0.91  | 6.53E-03 | 8.4E-06 | 0.68 |
| 158 | triacylglycerol                 | TG(54:4) [NL-18:2]            | 1.48 | 1.11 | 1.97  | 6.88E-03 | 8.8E-01 | 1.01 |
| 159 | phosphatidylcholine             | PC(40:8)                      | 0.51 | 0.31 | 0.83  | 7.09E-03 | 8.1E-03 | 0.89 |
| 160 | phosphatidylserine              | PS(38:3)                      | 2.31 | 1.26 | 4.23  | 7.34E-03 | 7.9E-03 | 1.11 |
| 161 | diacylglycerol                  | DG(14:0_16:0)                 | 0.84 | 0.73 | 0.96  | 7.42E-03 | 1.6E-13 | 0.32 |
| 162 | dihexosylceramide               | Hex2Cer(d18:2/24:1)           | 1.67 | 1.14 | 2.43  | 7.61E-03 | 1.7E-09 | 1.42 |

|     |                                 |                     |      |      |      |          |         |      |
|-----|---------------------------------|---------------------|------|------|------|----------|---------|------|
| 163 | free fatty acid                 | FA(20:2)            | 1.97 | 1.19 | 3.25 | 7.75E-03 | 1.4E-05 | 1.22 |
| 164 | sphingomyelin                   | SM(41:1) (a)        | 1.66 | 1.14 | 2.41 | 7.79E-03 | 7.1E-06 | 1.30 |
| 165 | phosphatidylserine              | PS(36:2)            | 2.26 | 1.26 | 4.04 | 8.40E-03 | 6.3E-02 | 1.08 |
| 166 | triacylglycerol                 | TG(54:6) [NL-22:6]  | 0.76 | 0.61 | 0.94 | 8.78E-03 | 4.6E-06 | 0.63 |
| 167 | alkylphosphatidylcholine        | PC(O-36:5)          | 0.65 | 0.46 | 0.91 | 8.78E-03 | 1.7E-01 | 0.91 |
| 168 | triacylglycerol                 | TG(52:2) [NL-18:2]  | 0.67 | 0.50 | 0.90 | 8.80E-03 | 5.1E-08 | 0.69 |
| 169 | cholesterol                     | COH                 | 2.85 | 1.32 | 6.19 | 8.85E-03 | 9.5E-08 | 1.15 |
| 170 | deoxyceramide                   | Cer(m18:1/22:0)     | 0.71 | 0.55 | 0.92 | 8.86E-03 | 5.0E-06 | 0.67 |
| 171 | diacylglycerol                  | DG(16:0_16:1)       | 0.73 | 0.57 | 0.93 | 9.18E-03 | 1.2E-08 | 0.61 |
| 172 | triacylglycerol                 | TG(52:3) [NL-18:2]  | 1.80 | 1.16 | 2.79 | 9.67E-03 | 8.1E-01 | 1.01 |
| 173 | triacylglycerol                 | TG(52:1) [NL-18:1]  | 1.56 | 1.13 | 2.17 | 9.75E-03 | 7.8E-01 | 0.99 |
| 174 | free fatty acid                 | FA(18:3)            | 1.48 | 1.10 | 1.99 | 9.84E-03 | 6.2E-02 | 1.14 |
| 175 | sphingosine                     | Sph(d18:1)          | 1.91 | 1.17 | 3.12 | 9.96E-03 | 2.2E-02 | 1.11 |
| 176 | phosphatidylcholine (oxidised)  | PC(36:4) [+OH]      | 1.49 | 1.11 | 2.00 | 1.00E-02 | 9.0E-05 | 1.30 |
| 177 | alkenylphosphatidylethanolamine | PE(P-18:1/20:3) (a) | 0.70 | 0.53 | 0.92 | 1.00E-02 | 2.8E-01 | 0.92 |
| 178 | triacylglycerol                 | TG(52:3) [SIM]      | 1.94 | 1.18 | 3.19 | 1.03E-02 | 5.1E-01 | 1.02 |
| 179 | free fatty acid                 | FA(14:0)            | 1.86 | 1.16 | 2.98 | 1.04E-02 | 6.7E-03 | 1.14 |
| 180 | triacylglycerol                 | TG(51:2) [NL-15:0]  | 1.42 | 1.08 | 1.86 | 1.04E-02 | 5.1E-01 | 0.95 |
| 181 | monohexosylceramide             | HexCer(d18:1/20:0)  | 1.81 | 1.15 | 2.85 | 1.10E-02 | 2.3E-06 | 1.26 |
| 182 | alkenylphosphatidylethanolamine | PE(P-15:0/22:6) (b) | 0.69 | 0.52 | 0.91 | 1.14E-02 | 2.8E-02 | 0.84 |
| 183 | free fatty acid                 | FA(17:0)            | 2.03 | 1.17 | 3.51 | 1.19E-02 | 1.7E-04 | 1.17 |
| 184 | alkenylphosphatidylethanolamine | PE(P-17:0/22:6) (b) | 0.67 | 0.49 | 0.91 | 1.24E-02 | 2.7E-01 | 0.93 |
| 185 | phosphatidylethanolamine        | PE(16:0_20:5)       | 0.74 | 0.59 | 0.94 | 1.27E-02 | 4.7E-07 | 0.63 |
| 186 | ceramide                        | Cer(d19:1/26:0)     | 1.43 | 1.07 | 1.90 | 1.29E-02 | 7.7E-05 | 1.37 |
| 187 | alkylphosphatidylethanolamine   | PE(O-38:5) (b)      | 0.64 | 0.45 | 0.91 | 1.35E-02 | 1.9E-02 | 0.87 |
| 188 | deoxyceramide                   | Cer(m18:1/23:0)     | 0.71 | 0.55 | 0.93 | 1.35E-02 | 9.0E-06 | 0.67 |
| 189 | alkenylphosphatidylethanolamine | PE(P-18:0/20:3) (a) | 0.71 | 0.55 | 0.93 | 1.36E-02 | 2.7E-01 | 0.91 |
| 190 | alkenylphosphatidylethanolamine | PE(P-15:0/20:4) (a) | 0.75 | 0.60 | 0.94 | 1.36E-02 | 3.1E-02 | 0.81 |
| 191 | phosphatidylcholine             | PC(16:1_20:4)       | 0.72 | 0.55 | 0.94 | 1.40E-02 | 9.4E-03 | 0.81 |
| 192 | triacylglycerol                 | TG(54:3) [SIM]      | 1.61 | 1.10 | 2.37 | 1.43E-02 | 9.7E-01 | 1.00 |
| 193 | sphingosine                     | Sph(d16:1)          | 2.28 | 1.18 | 4.42 | 1.44E-02 | 4.3E-04 | 1.13 |
| 194 | phosphatidylcholine             | PC(18:0_20:3)       | 0.56 | 0.35 | 0.89 | 1.45E-02 | 5.7E-04 | 0.85 |
| 195 | alkenylphosphatidylethanolamine | PE(P-18:1/22:4)     | 1.54 | 1.08 | 2.19 | 1.45E-02 | 6.2E-05 | 1.28 |
| 196 | lysophosphatidylcholine         | LPC(20:3) [sn1]     | 0.58 | 0.37 | 0.89 | 1.47E-02 | 1.1E-02 | 0.89 |
| 197 | triacylglycerol                 | TG(48:3) [NL-16:1]  | 0.79 | 0.66 | 0.96 | 1.53E-02 | 1.6E-13 | 0.46 |
| 198 | cholesterol ester               | CE(24:4)            | 1.48 | 1.07 | 2.04 | 1.59E-02 | 5.6E-03 | 1.22 |
| 199 | triacylglycerol                 | TG(50:1) [NL-16:0]  | 0.70 | 0.51 | 0.94 | 1.68E-02 | 2.5E-09 | 0.68 |
| 200 | phosphatidylcholine             | PC(18:1_22:6) (b)   | 1.31 | 1.05 | 1.64 | 1.69E-02 | 4.0E-01 | 1.09 |
| 201 | monohexosylceramide             | HexCer(d18:1/18:0)  | 1.70 | 1.10 | 2.63 | 1.74E-02 | 2.5E-08 | 1.33 |
| 202 | phosphatidylinositol            | PI(16:0/16:0)       | 0.76 | 0.61 | 0.96 | 1.76E-02 | 6.6E-04 | 0.72 |
| 203 | ceramide                        | Cer(d18:2/18:0)     | 1.45 | 1.06 | 2.00 | 1.78E-02 | 2.5E-03 | 1.23 |
| 204 | alkylphosphatidylethanolamine   | PE(O-18:0/22:5)     | 0.61 | 0.41 | 0.91 | 1.78E-02 | 1.3E-01 | 0.92 |
| 205 | triacylglycerol                 | TG(52:4) [NL-18:2]  | 1.54 | 1.07 | 2.21 | 1.78E-02 | 4.9E-01 | 1.04 |
| 206 | dihydroceramide                 | Cer(d18:0/24:0)     | 0.68 | 0.49 | 0.94 | 1.78E-02 | 5.7E-03 | 0.82 |
| 207 | triacylglycerol                 | TG(56:6) [NL-20:4]  | 1.35 | 1.04 | 1.75 | 1.83E-02 | 2.6E-02 | 1.23 |
| 208 | alkenylphosphatidylethanolamine | PE(P-16:0/18:3)     | 0.74 | 0.58 | 0.95 | 1.92E-02 | 1.9E-01 | 0.90 |
| 209 | phosphatidylinositol            | PI(18:0_20:3) (b)   | 0.61 | 0.40 | 0.93 | 1.93E-02 | 2.5E-02 | 0.90 |
| 210 | phosphatidylethanolamine        | PE(16:0_18:3) (b)   | 0.78 | 0.63 | 0.96 | 1.94E-02 | 6.0E-09 | 0.58 |
| 211 | triacylglycerol                 | TG(50:4) [NL-18:3]  | 0.78 | 0.63 | 0.96 | 1.97E-02 | 4.3E-15 | 0.47 |
| 212 | triacylglycerol                 | TG(48:3) [SIM]      | 0.80 | 0.66 | 0.97 | 2.02E-02 | 1.3E-16 | 0.41 |
| 213 | lysophosphatidylcholine         | LPC(16:0) [sn2]     | 0.45 | 0.23 | 0.88 | 2.07E-02 | 3.0E-01 | 0.97 |
| 214 | dihexosylceramide               | Hex2Cer(d18:1/24:0) | 1.81 | 1.20 | 2.99 | 2.09E-02 | 5.8E-03 | 1.14 |
| 215 | triacylglycerol                 | TG(54:7) [NL-20:5]  | 0.80 | 0.67 | 0.97 | 2.14E-02 | 9.7E-09 | 0.52 |
| 216 | ceramide                        | Cer(d20:1/26:0)     | 1.09 | 1.01 | 1.18 | 2.25E-02 | 7.7E-01 | 1.10 |
| 217 | alkenylphosphatidylcholine      | PC(P-16:0/18:1)     | 2.11 | 1.12 | 3.97 | 2.25E-02 | 2.9E-08 | 1.20 |
| 218 | phosphatidylserine              | PS(38:5)            | 1.33 | 1.04 | 1.71 | 2.26E-02 | 2.6E-03 | 1.35 |
| 219 | phosphatidylcholine             | PC(18:2_18:2)       | 0.67 | 0.47 | 0.95 | 2.29E-02 | 5.0E-02 | 0.88 |
| 220 | lysophosphatidylcholine         | LPC(18:3) [sn2] (a) | 0.75 | 0.59 | 0.97 | 2.35E-02 | 5.7E-02 | 0.85 |
| 221 | alkylphosphatidylethanolamine   | PE(O-16:0/20:4)     | 0.74 | 0.56 | 0.96 | 2.37E-02 | 4.2E-01 | 0.94 |
| 222 | lysophosphatidylcholine         | LPC(20:1) [sn1]     | 1.61 | 1.07 | 2.43 | 2.39E-02 | 3.7E-04 | 1.20 |
| 223 | triacylglycerol                 | TG(50:2) [NL-18:2]  | 0.69 | 0.49 | 0.96 | 2.43E-02 | 4.4E-07 | 0.74 |
| 224 | deoxyceramide                   | Cer(m18:0/24:1)     | 0.69 | 0.50 | 0.96 | 2.49E-02 | 9.7E-03 | 0.82 |
| 225 | triacylglycerol                 | TG(50:1) [NL-14:0]  | 0.75 | 0.58 | 0.97 | 2.54E-02 | 3.5E-10 | 0.58 |
| 226 | alkenylphosphatidylethanolamine | PE(P-15:0/20:4) (b) | 0.75 | 0.58 | 0.96 | 2.55E-02 | 1.2E-02 | 0.80 |
| 227 | triacylglycerol                 | TG(50:1) [SIM]      | 0.67 | 0.47 | 0.96 | 2.56E-02 | 2.1E-09 | 0.71 |
| 228 | alkenylphosphatidylethanolamine | PE(P-18:0/20:4)     | 0.70 | 0.51 | 0.95 | 2.63E-02 | 5.2E-01 | 0.96 |
| 229 | lysophosphatidylcholine         | LPC(16:0) [sn1]     | 0.42 | 0.20 | 0.91 | 2.71E-02 | 4.5E-01 | 0.98 |
| 230 | phosphatidylinositol            | PI(18:0_18:1)       | 0.62 | 0.41 | 0.95 | 2.74E-02 | 1.5E-02 | 0.89 |
| 231 | free fatty acid                 | FA(18:0)            | 2.11 | 1.08 | 4.11 | 2.77E-02 | 5.4E-03 | 1.10 |
| 232 | phosphatidylcholine             | PC(18:0_18:1)       | 0.49 | 0.25 | 0.94 | 2.79E-02 | 2.3E-01 | 0.96 |
| 233 | alkenylphosphatidylcholine      | PC(P-20:0/20:4)     | 1.78 | 1.07 | 2.95 | 2.80E-02 | 1.4E-05 | 1.19 |
| 234 | phosphatidylinositol            | PI(37:6)            | 0.73 | 0.54 | 0.97 | 2.82E-02 | 1.4E-01 | 0.89 |
| 235 | phosphatidylethanolamine        | PE(16:0_16:1)       | 0.81 | 0.66 | 0.98 | 2.97E-02 | 2.0E-05 | 0.64 |
| 236 | triacylglycerol                 | TG(52:2) [NL-16:0]  | 1.60 | 1.05 | 2.43 | 3.03E-02 | 6.4E-01 | 0.98 |
| 237 | triacylglycerol                 | TG(51:0) [SIM]      | 2.05 | 1.06 | 3.94 | 3.12E-02 | 4.4E-02 | 1.08 |
| 238 | monoalkyldiacylglycerol         | TG(O-52:0) [SIM]    | 2.05 | 1.06 | 3.94 | 3.12E-02 | 4.4E-02 | 1.08 |
| 239 | alkenylphosphatidylcholine      | PC(P-18:1/18:1)     | 1.61 | 1.05 | 2.48 | 3.14E-02 | 4.1E-08 | 1.32 |
| 240 | desmosterol                     | DE(20:5)            | 0.80 | 0.65 | 0.99 | 3.17E-02 | 8.2E-01 | 0.97 |
| 241 | acylcarnitine                   | AC(13:0)            | 1.25 | 1.02 | 1.52 | 3.18E-02 | 2.2E-03 | 1.37 |
| 242 | diacylglycerol                  | DG(18:1_18:2)       | 1.37 | 1.02 | 1.83 | 3.22E-02 | 6.8E-02 | 0.87 |
| 243 | diacylglycerol                  | DG(16:0_16:0)       | 0.84 | 0.71 | 0.99 | 3.24E-02 | 1.1E-10 | 0.45 |
| 244 | alkylphosphatidylcholine        | PC(O-36:0)          | 1.90 | 1.06 | 3.42 | 3.30E-02 | 2.5E-04 | 1.15 |
| 245 | triacylglycerol                 | TG(52:1) [NL-18:0]  | 0.78 | 0.62 | 0.98 | 3.31E-02 | 7.2E-10 | 0.57 |
| 246 | sphingomyelin                   | SM(44:1)            | 1.82 | 1.05 | 3.17 | 3.33E-02 | 1.4E-07 | 1.21 |

|     |                                   |                               |      |      |      |          |         |      |
|-----|-----------------------------------|-------------------------------|------|------|------|----------|---------|------|
| 247 | dihexosylceramide                 | Hex2Cer(d18:1/16:0)           | 1.84 | 1.05 | 3.24 | 3.36E-02 | 9.2E-10 | 1.27 |
| 248 | alkenylphosphatidylcholine        | PC(P-16:0/16:0)               | 2.00 | 1.06 | 3.76 | 3.40E-02 | 7.8E-08 | 1.20 |
| 249 | alkenylphosphatidylethanolamine   | PE(P-18:1/18:2) (a)           | 0.70 | 0.51 | 0.97 | 3.43E-02 | 7.7E-01 | 0.98 |
| 250 | phosphatidylcholine               | PC(17:0_20:4)                 | 1.58 | 1.03 | 2.44 | 3.54E-02 | 1.5E-02 | 1.14 |
| 251 | sphingomyelin                     | SM(43:1)                      | 1.88 | 1.04 | 3.39 | 3.58E-02 | 1.7E-07 | 1.20 |
| 252 | diacylglycerol                    | DG(14:0_18:2)                 | 0.75 | 0.57 | 0.98 | 3.60E-02 | 8.4E-15 | 0.55 |
| 253 | lysophosphatidylethanolamine      | LPE(16:0) [sn2]               | 0.67 | 0.47 | 0.98 | 3.63E-02 | 7.2E-02 | 0.91 |
| 254 | triacylglycerol                   | TG(53:2) [NL-18:1]            | 1.28 | 1.02 | 1.61 | 3.66E-02 | 1.2E-01 | 0.87 |
| 255 | triacylglycerol                   | TG(54:7) [NL-22:6]            | 0.81 | 0.67 | 0.99 | 3.68E-02 | 3.5E-06 | 0.60 |
| 256 | GM1 ganglioside                   | GM1(d18:1/16:0)               | 1.53 | 1.02 | 2.29 | 3.76E-02 | 1.3E-07 | 1.33 |
| 257 | cholesterol ester                 | CE(16:1)                      | 0.68 | 0.46 | 0.98 | 3.96E-02 | 2.0E-01 | 1.08 |
| 258 | alkenylphosphatidylethanolamine   | PE(P-16:0/22:6)               | 0.64 | 0.43 | 0.97 | 3.96E-02 | 1.3E-01 | 0.92 |
| 259 | ceramide                          | Cer(d16:1/24:0)               | 0.70 | 0.49 | 0.98 | 4.14E-02 | 9.5E-05 | 0.77 |
| 260 | diacylglycerol                    | DG(16:0_20:4)                 | 0.72 | 0.52 | 0.99 | 4.15E-02 | 3.3E-08 | 0.67 |
| 261 | alkenylphosphatidylethanolamine   | PE(P-15:0/22:6) (a)           | 0.75 | 0.58 | 0.99 | 4.24E-02 | 1.3E-02 | 0.82 |
| 262 | ceramide                          | Cer(d18:2/21:0)               | 1.20 | 1.00 | 1.44 | 4.25E-02 | 7.6E-02 | 1.25 |
| 263 | alkenylphosphatidylethanolamine   | PE(P-18:0/22:5) (n3)          | 0.69 | 0.48 | 0.99 | 4.48E-02 | 3.4E-01 | 0.95 |
| 264 | lysophosphatidylcholine           | LPC(18:3) (a) [sn1] [104_sn1] | 0.77 | 0.59 | 1.00 | 4.54E-02 | 1.4E-01 | 0.89 |
| 265 | lysophosphatidylcholine           | LPC(16:1) [sn1]               | 0.99 | 0.36 | 0.99 | 4.54E-02 | 4.2E-01 | 0.97 |
| 266 | monoalkyl diacylglycerol          | TG(O-50:1) [NL-16:0]          | 0.75 | 0.55 | 1.00 | 4.54E-02 | 2.1E-05 | 0.72 |
| 267 | lysophosphatidylcholine           | LPC(22:1) [sn1]               | 1.37 | 1.01 | 1.86 | 4.59E-02 | 6.6E-04 | 1.25 |
| 268 | sphingomyelin                     | SM(43:2) (c)                  | 1.82 | 1.01 | 3.28 | 4.69E-02 | 3.2E-09 | 1.22 |
| 269 | triacylglycerol                   | TG(54:4) [SIM]                | 1.49 | 1.00 | 2.22 | 4.73E-02 | 1.0E+00 | 1.00 |
| 270 | lysophosphatidylethanolamine      | LPE(18:0) [sn2]               | 0.62 | 0.38 | 1.00 | 4.78E-02 | 1.0E-01 | 0.93 |
| 271 | cholesterol ester                 | CE(24:0)                      | 0.77 | 0.59 | 1.00 | 4.79E-02 | 3.2E-01 | 0.92 |
| 272 | alkenylphosphatidylethanolamine   | PE(P-18:1/20:4) (a)           | 0.82 | 0.68 | 1.00 | 4.85E-02 | 5.9E-01 | 0.95 |
| 273 | monohexosylceramide               | HexCer(d18:2/18:0)            | 1.60 | 1.00 | 2.56 | 4.85E-02 | 5.9E-06 | 1.27 |
| 274 | sulfatide                         | Sulfatide (d18:1/24:1)        | 1.42 | 0.99 | 2.03 | 4.92E-02 | 3.2E-04 | 1.26 |
| 275 | alkenylphosphatidylethanolamine   | PE(P-18:1/20:4) (b)           | 0.79 | 0.62 | 1.00 | 4.95E-02 | 6.3E-01 | 0.96 |
| 276 | alkenylphosphatidylethanolamine   | PE(P-17:0/20:4) (a)           | 0.77 | 0.60 | 1.00 | 5.01E-02 | 4.4E-01 | 0.94 |
| 277 | phosphatidylcholine               | PC(18:0_22:5) (n3)            | 0.67 | 0.45 | 1.00 | 5.18E-02 | 5.4E-03 | 0.87 |
| 278 | phosphatidylethanolamine          | PE(36:0)                      | 1.09 | 1.00 | 1.20 | 5.26E-02 | 3.1E-02 | 1.82 |
| 279 | cholesterol ester                 | CE(16:0)                      | 2.04 | 0.98 | 4.25 | 5.35E-02 | 5.9E-05 | 1.15 |
| 280 | monoalkyl diacylglycerol          | TG(O-52:0) [NL-16:0]          | 0.85 | 0.71 | 1.01 | 5.44E-02 | 1.4E-10 | 0.45 |
| 281 | alkylphosphatidylethanolamine     | PE(O-16:0/18:2)               | 0.75 | 0.55 | 1.01 | 5.49E-02 | 9.3E-01 | 1.01 |
| 282 | lysophosphatidylethanolamine      | LPE(16:0) [sn1]               | 0.69 | 0.47 | 1.01 | 5.54E-02 | 4.9E-02 | 0.90 |
| 283 | sphingomyelin                     | SM(d18:1/14:0/SM(d16:1/16:0)) | 2.00 | 0.99 | 4.05 | 5.58E-02 | 1.5E-03 | 1.11 |
| 284 | phosphatidylcholine               | PC(33:0) (b)                  | 1.69 | 0.99 | 2.89 | 5.61E-02 | 4.5E-05 | 1.17 |
| 285 | monoalkyl diacylglycerol          | TG(O-52:2) [NL-16:0]          | 0.75 | 0.55 | 1.01 | 5.62E-02 | 9.4E-06 | 0.72 |
| 286 | triacylglycerol                   | TG(51:0) [NL-16:0]            | 0.85 | 0.71 | 1.01 | 5.62E-02 | 1.7E-10 | 0.45 |
| 287 | free fatty acid                   | FA(22:5)                      | 1.40 | 0.99 | 1.98 | 5.67E-02 | 3.1E-03 | 1.18 |
| 288 | triacylglycerol                   | TG(52:2) [SIM]                | 1.61 | 1.00 | 2.59 | 5.69E-02 | 7.9E-01 | 0.99 |
| 289 | triacylglycerol                   | TG(52:1) [SIM]                | 0.79 | 0.61 | 1.01 | 5.75E-02 | 7.2E-09 | 0.62 |
| 290 | triacylglycerol                   | TG(50:2) [SIM]                | 0.68 | 0.44 | 1.03 | 6.15E-02 | 3.1E-05 | 0.81 |
| 291 | cholesterol ester                 | CE(15:0)                      | 1.44 | 0.97 | 2.15 | 6.28E-02 | 4.0E-08 | 1.37 |
| 292 | phosphatidylethanolamine          | PE(18:1_22:6) (b)             | 1.20 | 0.99 | 1.45 | 6.37E-02 | 4.3E-01 | 0.91 |
| 293 | lysophosphatidylinositol          | PI(18:1) [sn1]                | 0.76 | 0.56 | 1.02 | 6.51E-02 | 9.3E-01 | 0.99 |
| 294 | alkenylphosphatidylethanolamine   | PE(P-18:0/18:2)               | 0.71 | 0.50 | 1.02 | 6.56E-02 | 9.5E-01 | 1.00 |
| 295 | lysoalkenylphosphatidylethanolami | LPE(P-16:0)                   | 0.69 | 0.46 | 1.05 | 6.62E-02 | 4.0E-01 | 1.05 |
| 296 | free fatty acid                   | FA(20:4)                      | 1.37 | 0.98 | 1.90 | 6.65E-02 | 6.8E-03 | 1.19 |
| 297 | triacylglycerol                   | TG(49:1) [SIM]                | 0.79 | 0.61 | 1.02 | 6.66E-02 | 1.6E-07 | 0.66 |
| 298 | alkenylphosphatidylethanolamine   | PE(P-18:0/18:1)               | 0.68 | 0.45 | 1.03 | 6.76E-02 | 3.3E-01 | 1.05 |
| 299 | free fatty acid                   | FA(15:0)                      | 1.55 | 0.97 | 2.48 | 6.95E-02 | 5.3E-04 | 1.17 |
| 300 | ceramide-1-phosphate              | Cer1P(d18:1/16:0)             | 1.39 | 0.97 | 1.99 | 7.36E-02 | 5.3E-04 | 1.25 |
| 301 | alkylphosphatidylcholine          | PC(O-40:5)                    | 1.74 | 0.95 | 3.18 | 7.47E-02 | 3.7E-06 | 1.18 |
| 302 | triacylglycerol                   | TG(50:4) [SIM]                | 0.82 | 0.66 | 1.02 | 7.52E-02 | 1.2E-13 | 0.52 |
| 303 | phosphatidylinositol              | PI(18:0_22:5) (n3)            | 0.70 | 0.46 | 1.04 | 7.68E-02 | 3.5E-04 | 0.82 |
| 304 | cholesterol ester                 | CE(22:4)                      | 1.42 | 0.95 | 2.10 | 7.74E-02 | 3.7E-08 | 1.37 |
| 305 | phosphatidylserine                | PS(36:1)                      | 1.96 | 0.93 | 4.15 | 7.93E-02 | 3.1E-02 | 1.07 |
| 306 | lysoalkenylphosphatidylethanolami | LPE(P-18:0)                   | 0.73 | 0.51 | 1.05 | 7.95E-02 | 6.0E-01 | 1.03 |
| 307 | phosphatidylcholine               | PC(15-MHDA_20:4)              | 1.33 | 0.97 | 1.84 | 7.98E-02 | 2.1E-03 | 1.23 |
| 308 | phosphatidylcholine               | PC(15-MHDA_18:2)              | 1.29 | 0.97 | 1.72 | 8.20E-02 | 5.8E-04 | 1.28 |
| 309 | phosphatidylinositol              | PI(18:0_22:4)                 | 0.72 | 0.49 | 1.05 | 8.34E-02 | 1.1E-01 | 0.91 |
| 310 | cholesterol ester                 | CE(24:6)                      | 0.73 | 0.52 | 1.04 | 8.38E-02 | 7.8E-02 | 0.90 |
| 311 | alkenylphosphatidylethanolamine   | PE(P-16:0/18:1)               | 0.67 | 0.42 | 1.06 | 8.50E-02 | 2.1E-01 | 1.06 |
| 312 | alkylphosphatidylcholine          | PC(O-16:0/16:0)               | 1.74 | 0.93 | 3.25 | 8.52E-02 | 4.7E-05 | 1.15 |
| 313 | lysophosphatidylcholine           | LPC(20:1) [sn2]               | 1.45 | 0.95 | 2.22 | 8.56E-02 | 6.3E-04 | 1.18 |
| 314 | lysophosphatidylcholine           | LPC(26:0) [sn1]               | 0.71 | 0.48 | 1.05 | 8.59E-02 | 6.8E-01 | 0.98 |
| 315 | phosphatidylethanolamine          | PE(15-MHDA_22:6)              | 1.22 | 0.97 | 1.53 | 8.65E-02 | 5.7E-01 | 0.94 |
| 316 | cholesterol ester                 | CE(22:0)                      | 0.79 | 0.61 | 1.04 | 8.66E-02 | 1.6E-01 | 0.89 |
| 317 | free fatty acid                   | FA(16:1)                      | 1.25 | 0.97 | 1.61 | 8.87E-02 | 1.7E-03 | 1.31 |
| 318 | diacylglycerol                    | DG(18:1_22:5)                 | 1.22 | 0.96 | 1.54 | 9.04E-02 | 1.4E-01 | 0.86 |
| 319 | ceramide                          | Cer(d16:1/24:1)               | 1.42 | 0.94 | 2.14 | 9.05E-02 | 5.7E-01 | 1.03 |
| 320 | deoxyceramide                     | Cer(m18:1/20:0)               | 0.80 | 0.61 | 1.04 | 9.10E-02 | 2.4E-04 | 0.73 |
| 321 | triacylglycerol                   | TG(50:1) [NL-18:1]            | 0.76 | 0.55 | 1.05 | 9.12E-02 | 8.0E-08 | 0.71 |
| 322 | phosphatidylcholine               | PC(17:0_18:2)                 | 1.72 | 0.90 | 3.26 | 9.26E-02 | 1.2E-03 | 1.12 |
| 323 | monoalkyl diacylglycerol          | TG(O-54:3) [SIM]              | 1.72 | 0.92 | 3.21 | 9.38E-02 | 4.6E-01 | 0.98 |
| 324 | triacylglycerol                   | TG(54:1) [NL-18:1]            | 0.88 | 0.75 | 1.02 | 9.42E-02 | 2.0E-08 | 0.46 |
| 325 | lysophosphatidylcholine           | LPC(22:5) [sn2] (n3)          | 0.72 | 0.50 | 1.06 | 9.50E-02 | 1.9E-02 | 0.88 |
| 326 | monohexosylceramide               | HexCer(d18:2/22:0)            | 1.49 | 0.94 | 2.37 | 9.54E-02 | 6.0E-03 | 1.14 |
| 327 | monoalkyl diacylglycerol          | TG(O-50:2) [NL-18:1]          | 0.75 | 0.53 | 1.06 | 9.55E-02 | 2.1E-02 | 0.87 |
| 328 | cholesterol ester                 | CE(22:5) (n6)                 | 1.32 | 0.94 | 1.86 | 9.67E-02 | 2.4E-04 | 1.29 |
| 329 | phosphatidylethanolamine          | PE(18:0_18:1)                 | 0.77 | 0.57 | 1.05 | 9.82E-02 | 6.3E-09 | 0.67 |
| 330 | phosphatidylethanolamine          | PE(17:0_20:4)                 | 1.27 | 0.96 | 1.67 | 9.83E-02 | 2.7E-01 | 0.92 |

|     |                                   |                               |      |      |      |          |         |      |
|-----|-----------------------------------|-------------------------------|------|------|------|----------|---------|------|
| 331 | diacylglycerol                    | DG(18:1_20:5)                 | 0.90 | 0.79 | 1.02 | 9.88E-02 | 1.9E-06 | 0.42 |
| 332 | alkylphosphatidylcholine          | PC(O-18:0/20:4)               | 1.45 | 0.93 | 2.28 | 9.91E-02 | 2.0E-04 | 1.19 |
| 333 | phosphatidylcholine               | PC(16:0_18:3) (a)             | 0.62 | 0.35 | 1.10 | 1.01E-01 | 4.6E-01 | 0.97 |
| 334 | phosphatidylcholine               | PC(34:2) [+OH]                | 0.88 | 0.74 | 1.04 | 1.02E-01 | 8.6E-01 | 0.97 |
| 335 | lysophosphatidylcholine           | LPC(18:2) [sn2]               | 0.61 | 0.33 | 1.11 | 1.04E-01 | 5.1E-01 | 0.98 |
| 336 | GM3 ganglioside                   | GM3(d18:1/24:1)               | 1.41 | 0.93 | 2.14 | 1.05E-01 | 6.7E-10 | 1.37 |
| 337 | phosphatidylcholine               | PC(15-MHDA_18:1)              | 1.32 | 0.95 | 1.84 | 1.05E-01 | 8.6E-05 | 1.25 |
| 338 | triacylglycerol                   | TG(56:7) [NL-20:4]            | 1.21 | 0.95 | 1.55 | 1.06E-01 | 1.7E-01 | 1.14 |
| 339 | sulfatide                         | Sulfatide (d18:1-/24:0(OH))   | 0.71 | 0.47 | 1.07 | 1.06E-01 | 1.4E-01 | 0.93 |
| 340 | alkylphosphatidylethanolamine     | PE(O-18:0/22:6)               | 0.70 | 0.46 | 1.08 | 1.08E-01 | 8.1E-02 | 0.91 |
| 341 | cholesterol ester                 | CE(20:1)                      | 1.44 | 0.92 | 2.27 | 1.09E-01 | 7.6E-05 | 1.21 |
| 342 | alkenylphosphatidylethanolamine   | PE(P-18:1/18:1) (a)           | 0.76 | 0.55 | 1.06 | 1.10E-01 | 3.3E-01 | 1.06 |
| 343 | phosphatidylcholine               | PC(16:0_20:3) (a)             | 0.58 | 0.30 | 1.13 | 1.11E-01 | 2.6E-01 | 0.96 |
| 344 | cholesterol ester                 | CE(18:2)                      | 1.52 | 0.90 | 2.58 | 1.11E-01 | 1.3E-07 | 1.24 |
| 345 | free fatty acid                   | FA(17:1)                      | 1.42 | 0.92 | 2.19 | 1.13E-01 | 1.4E-03 | 1.18 |
| 346 | ceramide                          | Cer(d18:2/14:0)               | 0.81 | 0.63 | 1.05 | 1.15E-01 | 9.3E-01 | 0.99 |
| 347 | monoalkyldiacylglycerol           | TG(O-52:1) [NL-16:0]          | 0.80 | 0.61 | 1.06 | 1.15E-01 | 4.9E-05 | 0.70 |
| 348 | lysophosphatidylcholine           | LPC(22:1) [sn2]               | 1.27 | 0.94 | 1.70 | 1.16E-01 | 2.1E-03 | 1.24 |
| 349 | free fatty acid                   | FA(20:3)                      | 1.41 | 0.92 | 2.15 | 1.16E-01 | 8.0E-03 | 1.14 |
| 350 | triacylglycerol                   | TG(54:0) [SIM]                | 0.86 | 0.71 | 1.04 | 1.16E-01 | 2.0E-09 | 0.52 |
| 351 | phosphatidylethanolamine          | PE(15-MHDA_20:4)              | 1.24 | 0.94 | 1.63 | 1.20E-01 | 4.7E-01 | 0.94 |
| 352 | phosphatidylcholine               | PC(31:0) (a)                  | 0.80 | 0.60 | 1.06 | 1.23E-01 | 1.1E-01 | 0.88 |
| 353 | diacylglycerol                    | DG(18:2_18:2)                 | 1.15 | 0.96 | 1.39 | 1.23E-01 | 9.9E-02 | 0.83 |
| 354 | diacylglycerol                    | DG(18:1_18:1)                 | 1.23 | 0.95 | 1.60 | 1.23E-01 | 8.0E-03 | 0.81 |
| 355 | monoalkyldiacylglycerol           | TG(O-50:1) [NL-17:1]          | 0.80 | 0.59 | 1.07 | 1.25E-01 | 9.0E-05 | 0.74 |
| 356 | lysophosphatidylcholine           | LPC(22:5) (n3) [sn1] [104_sn  | 0.81 | 0.62 | 1.06 | 1.26E-01 | 9.2E-02 | 0.88 |
| 357 | alkylphosphatidylcholine          | PC(O-38:5)                    | 1.50 | 0.89 | 2.52 | 1.27E-01 | 4.1E-05 | 1.18 |
| 358 | sphingomyelin                     | SM(d18:0/22:0)                | 0.77 | 0.56 | 1.08 | 1.27E-01 | 9.4E-01 | 1.00 |
| 359 | alkenylphosphatidylethanolamine   | PE(P-18:1/18:1)               | 0.74 | 0.51 | 1.09 | 1.28E-01 | 2.1E-01 | 1.07 |
| 360 | lysophosphatidylcholine           | LPC(17:1) [sn2] (a)           | 0.69 | 0.42 | 1.12 | 1.28E-01 | 9.7E-01 | 1.00 |
| 361 | triacylglycerol                   | TG(54:1) [SIM]                | 0.87 | 0.73 | 1.04 | 1.28E-01 | 7.4E-09 | 0.50 |
| 362 | alkylphosphatidylethanolamine     | PE(O-18:1/18:2)               | 0.82 | 0.64 | 1.06 | 1.28E-01 | 9.6E-01 | 1.00 |
| 363 | monoalkyldiacylglycerol           | TG(O-54:4) [NL-18:2]          | 1.31 | 0.92 | 1.87 | 1.29E-01 | 4.3E-01 | 1.05 |
| 364 | lysophosphatidylcholine           | LPC(26:0) [sn2]               | 0.73 | 0.49 | 1.10 | 1.31E-01 | 5.2E-01 | 0.97 |
| 365 | diacylglycerol                    | DG(16:0_22:6)                 | 0.86 | 0.71 | 1.05 | 1.32E-01 | 1.9E-05 | 0.62 |
| 366 | triacylglycerol                   | TG(53:2) [SIM]                | 1.21 | 0.94 | 1.56 | 1.32E-01 | 3.0E-02 | 0.84 |
| 367 | alkenylphosphatidylethanolamine   | PE(P-18:0/22:6)               | 0.76 | 0.54 | 1.08 | 1.33E-01 | 4.5E-01 | 0.95 |
| 368 | triacylglycerol                   | TG(52:4) [SIM]                | 1.42 | 0.90 | 2.24 | 1.36E-01 | 6.0E-01 | 0.98 |
| 369 | ceramide                          | Cer(d18:2/17:0)               | 1.16 | 0.95 | 1.41 | 1.36E-01 | 9.2E-03 | 1.38 |
| 370 | triacylglycerol                   | TG(54:0) [NL-18:0]            | 0.89 | 0.77 | 1.04 | 1.36E-01 | 1.1E-06 | 0.49 |
| 371 | trihexosylceramide                | Hex3Cer(d18:1/24:0)           | 1.33 | 0.91 | 1.95 | 1.39E-01 | 4.3E-04 | 1.23 |
| 372 | cholesterol ester                 | CE(14:0)                      | 0.76 | 0.53 | 1.09 | 1.41E-01 | 9.5E-01 | 1.00 |
| 373 | alkenylphosphatidylcholine        | PC(P-18:0/22:5)               | 1.43 | 0.89 | 2.31 | 1.42E-01 | 1.3E-05 | 1.21 |
| 374 | lysoalkenylphosphatidylethanolami | LPE(P-18:1)                   | 0.80 | 0.59 | 1.09 | 1.42E-01 | 2.9E-01 | 1.08 |
| 375 | cholesterol ester                 | CE(20:0)                      | 0.82 | 0.62 | 1.08 | 1.47E-01 | 2.7E-01 | 0.91 |
| 376 | lysophosphatidylcholine           | LPC(22:5) [sn1] (n3)/LPC(22:5 | 0.75 | 0.51 | 1.11 | 1.52E-01 | 6.0E-02 | 0.91 |
| 377 | phosphatidylcholine               | PC(18:1_22:6) (a)             | 1.24 | 0.92 | 1.66 | 1.52E-01 | 5.1E-01 | 1.05 |
| 378 | GM3 ganglioside                   | GM3(d18:1/24:0)               | 0.76 | 0.52 | 1.11 | 1.55E-01 | 2.2E-02 | 1.15 |
| 379 | ceramide                          | Cer(d18:1/26:0)               | 1.41 | 0.88 | 2.27 | 1.55E-01 | 1.3E-03 | 1.16 |
| 380 | lysophosphatidylcholine           | LPC(18:0) [sn2]               | 0.64 | 0.34 | 1.18 | 1.59E-01 | 6.7E-01 | 0.99 |
| 381 | lysophosphatidylethanolamine      | LPE(18:0) [sn1]               | 0.70 | 0.43 | 1.15 | 1.62E-01 | 2.2E-01 | 0.95 |
| 382 | phosphatidylcholine               | PC(15-MHDA_22:6)              | 1.30 | 0.89 | 1.90 | 1.63E-01 | 2.2E-01 | 1.07 |
| 383 | sphingomyelin                     | SM(d18:2/22:0)                | 1.48 | 0.85 | 2.56 | 1.64E-01 | 1.4E-04 | 1.16 |
| 384 | triacylglycerol                   | TG(56:7) [NL-22:5](a)         | 1.19 | 0.93 | 1.52 | 1.66E-01 | 8.6E-01 | 0.98 |
| 385 | triacylglycerol                   | TG(56:7) [NL-22:5](b)         | 1.19 | 0.93 | 1.53 | 1.66E-01 | 8.6E-01 | 0.98 |
| 386 | phosphatidylglycerol              | PG(36:1)                      | 0.83 | 0.63 | 1.08 | 1.66E-01 | 1.5E-09 | 0.62 |
| 387 | lysophosphatidylcholine           | LPC(22:0) [sn2]               | 0.74 | 0.48 | 1.14 | 1.67E-01 | 1.4E-01 | 0.93 |
| 388 | alkylphosphatidylcholine          | PC(O-18:0/22:6)               | 1.44 | 0.86 | 2.43 | 1.69E-01 | 8.2E-03 | 1.11 |
| 389 | alkenylphosphatidylethanolamine   | PE(P-18:0/22:4)               | 1.24 | 0.91 | 1.68 | 1.72E-01 | 4.7E-03 | 1.21 |
| 390 | alkenylphosphatidylethanolamine   | PE(P-18:1/18:3)               | 0.85 | 0.67 | 1.07 | 1.72E-01 | 4.3E-01 | 0.93 |
| 391 | sphingosine                       | Sph(d18:2)                    | 1.54 | 0.83 | 2.85 | 1.73E-01 | 5.3E-03 | 1.11 |
| 392 | alkylphosphatidylcholine          | PC(O-16:0/20:3)               | 0.74 | 0.48 | 1.15 | 1.74E-01 | 1.5E-02 | 1.13 |
| 393 | phosphatidylinositol              | PI(15-MHDA_20:4)PI(17:0_2     | 0.73 | 0.47 | 1.14 | 1.77E-01 | 1.7E-03 | 0.87 |
| 394 | lysophosphatidylcholine           | LPC(19:0) [sn2] (a)           | 0.73 | 0.46 | 1.15 | 1.79E-01 | 3.2E-01 | 1.05 |
| 395 | alkylphosphatidylcholine          | PC(O-35:4)                    | 0.82 | 0.62 | 1.09 | 1.79E-01 | 9.1E-01 | 1.01 |
| 396 | ceramide                          | Cer(d16:1/16:0)               | 1.30 | 0.88 | 1.93 | 1.80E-01 | 2.0E-01 | 1.08 |
| 397 | triacylglycerol                   | TG(56:6) [NL-22:5](b)         | 1.20 | 0.92 | 1.58 | 1.80E-01 | 8.1E-01 | 0.98 |
| 398 | triacylglycerol                   | TG(56:6) [NL-22:5](a)         | 1.20 | 0.92 | 1.58 | 1.80E-01 | 8.1E-01 | 0.98 |
| 399 | triacylglycerol                   | TG(56:8) [NL-20:5]            | 0.82 | 0.61 | 1.10 | 1.82E-01 | 7.8E-05 | 0.75 |
| 400 | sphingomyelin                     | SM(d18:0/14:0)                | 1.45 | 0.84 | 2.49 | 1.85E-01 | 6.0E-03 | 1.12 |
| 401 | lysophosphatidylcholine           | LPC(15-MHDA) [sn1] [104_sn    | 1.24 | 0.90 | 1.70 | 1.89E-01 | 3.2E-03 | 1.20 |
| 402 | ceramide                          | Cer(d18:1/24:0)               | 0.69 | 0.40 | 1.20 | 1.92E-01 | 3.8E-01 | 0.96 |
| 403 | sphingomyelin                     | SM(d18:1/20:0)/SM(d16:1/2     | 1.60 | 0.78 | 3.29 | 1.94E-01 | 1.5E-04 | 1.12 |
| 404 | triacylglycerol                   | TG(54:7) [SIM]                | 0.89 | 0.75 | 1.06 | 1.95E-01 | 7.2E-07 | 0.56 |
| 405 | lysophosphatidylcholine           | LPC(18:2) [sn1]               | 0.71 | 0.43 | 1.19 | 1.95E-01 | 4.8E-01 | 0.97 |
| 406 | triacylglycerol                   | TG(54:5) [NL-18:3]            | 1.18 | 0.91 | 1.54 | 1.98E-01 | 9.9E-02 | 0.88 |
| 407 | ceramide                          | Cer(d16:1/18:0)               | 1.20 | 0.90 | 1.61 | 2.01E-01 | 9.2E-02 | 1.13 |
| 408 | phosphatidylinositol              | PI(18:0_20:3) (a)             | 0.74 | 0.47 | 1.18 | 2.03E-01 | 5.7E-02 | 0.91 |
| 409 | dihexosylceramide                 | Hex2Cer(d18:2/16:0)           | 1.34 | 0.85 | 2.11 | 2.03E-01 | 3.9E-07 | 1.27 |
| 410 | alkylphosphatidylethanolamine     | PE(O-18:1/22:6)               | 0.83 | 0.62 | 1.11 | 2.04E-01 | 2.6E-01 | 0.92 |
| 411 | ceramide                          | Cer(d17:1/22:0)               | 1.29 | 0.87 | 1.91 | 2.08E-01 | 9.9E-01 | 1.00 |
| 412 | alkenylphosphatidylcholine        | PC(P-36:3)                    | 0.66 | 0.35 | 1.26 | 2.10E-01 | 5.9E-03 | 1.10 |
| 413 | lysophosphatidylethanolamine      | LPE(18:2) [sn2]               | 0.84 | 0.64 | 1.10 | 2.10E-01 | 4.6E-02 | 0.86 |
| 414 | lysophosphatidylethanolamine      | LPE(18:2) [sn1]               | 0.83 | 0.62 | 1.11 | 2.11E-01 | 6.5E-02 | 0.87 |

|     |                                 |                               |      |      |      |          |         |      |
|-----|---------------------------------|-------------------------------|------|------|------|----------|---------|------|
| 415 | cholesterol ester               | CE(20:5)                      | 0.83 | 0.61 | 1.12 | 2.11E-01 | 1.4E-01 | 1.11 |
| 416 | phosphatidylcholine             | PC(16:0_20:4)                 | 1.45 | 0.81 | 2.61 | 2.12E-01 | 5.8E-03 | 1.12 |
| 417 | alkenylphosphatidylethanolamine | PE(P-18:1/18:2) (b)           | 0.83 | 0.63 | 1.11 | 2.15E-01 | 8.1E-01 | 0.98 |
| 418 | phosphatidylcholine             | PC(16:0_18:2)                 | 1.65 | 0.74 | 3.65 | 2.23E-01 | 1.9E-04 | 1.11 |
| 419 | lysophosphatidylcholine         | LPC(17:1) (a) [sn1] [104_sn1] | 0.78 | 0.53 | 1.16 | 2.24E-01 | 7.5E-01 | 1.02 |
| 420 | dihexosylceramide               | Hex2Cer(d18:1/18:0)           | 1.30 | 0.85 | 2.00 | 2.25E-01 | 7.6E-04 | 1.18 |
| 421 | diacylglycerol                  | DG(16:0_22:5)                 | 0.86 | 0.67 | 1.10 | 2.27E-01 | 1.8E-06 | 0.67 |
| 422 | lysophosphatidylcholine         | LPC(18:0) [sn1]               | 0.62 | 0.29 | 1.34 | 2.29E-01 | 6.4E-01 | 0.99 |
| 423 | phosphatidylinositol            | PI(16:0_20:3) (a)             | 0.77 | 0.50 | 1.19 | 2.32E-01 | 1.4E-02 | 0.88 |
| 424 | ceramide                        | Cer(d18:2/26:0)               | 1.20 | 0.89 | 1.63 | 2.32E-01 | 9.4E-02 | 1.13 |
| 425 | diacylglycerol                  | DG(18:0_18:2)                 | 0.83 | 0.62 | 1.12 | 2.33E-01 | 2.7E-07 | 0.69 |
| 426 | lysophosphatidylcholine         | LPC(22:0) [sn1]               | 0.77 | 0.50 | 1.19 | 2.35E-01 | 1.0E-01 | 0.92 |
| 427 | phosphatidylethanolamine        | PE(15-MHDA_18:2)              | 1.17 | 0.90 | 1.51 | 2.36E-01 | 5.6E-02 | 0.85 |
| 428 | sphingosine-1-phosphate         | S1P(d18:1)                    | 1.43 | 0.79 | 2.58 | 2.37E-01 | 2.7E-03 | 1.14 |
| 429 | lysophosphatidylethanolamine    | LPE(18:1) [sn2]               | 0.82 | 0.60 | 1.14 | 2.37E-01 | 1.9E-02 | 0.85 |
| 430 | triacylglycerol                 | TG(56:6) [SIM]                | 1.21 | 0.87 | 1.69 | 2.40E-01 | 6.9E-01 | 1.03 |
| 431 | triacylglycerol                 | TG(50:3) [SIM]                | 0.81 | 0.56 | 1.16 | 2.41E-01 | 1.2E-07 | 0.76 |
| 432 | desmosterol                     | DE(18:2)                      | 0.86 | 0.67 | 1.11 | 2.42E-01 | 1.2E-01 | 1.14 |
| 433 | lysophosphatidylcholine         | LPC(24:0) [sn2]               | 0.76 | 0.48 | 1.21 | 2.43E-01 | 1.4E-01 | 0.93 |
| 434 | triacylglycerol                 | TG(58:10) [SIM]               | 0.90 | 0.76 | 1.07 | 2.45E-01 | 1.0E-03 | 0.66 |
| 435 | monohexosylceramide             | HexCer(d18:2/24:0)            | 1.34 | 0.82 | 2.20 | 2.45E-01 | 3.7E-02 | 1.10 |
| 436 | triacylglycerol                 | TG(50:2) [NL-16:1]            | 0.85 | 0.64 | 1.13 | 2.47E-01 | 1.7E-02 | 0.85 |
| 437 | triacylglycerol                 | TG(51:1) [NL-17:0]            | 0.88 | 0.71 | 1.10 | 2.50E-01 | 1.9E-07 | 0.63 |
| 438 | monohexosylceramide             | HexCer(d18:1/22:0)            | 1.30 | 0.83 | 2.05 | 2.52E-01 | 1.5E-02 | 1.13 |
| 439 | lysophosphatidylethanolamine    | LPE(18:1) [sn1]               | 0.83 | 0.60 | 1.15 | 2.58E-01 | 3.9E-02 | 0.87 |
| 440 | triacylglycerol                 | TG(56:9) [SIM]                | 0.90 | 0.74 | 1.08 | 2.58E-01 | 2.3E-05 | 0.62 |
| 441 | lysalkylphosphatidylcholine     | LPC(O-18:1)                   | 1.21 | 0.88 | 1.66 | 2.59E-01 | 1.9E-03 | 1.20 |
| 442 | phosphatidylethanolamine        | PE(18:0_22:5) (n3)            | 0.86 | 0.66 | 1.12 | 2.61E-01 | 1.9E-05 | 0.71 |
| 443 | lysophosphatidylcholine         | LPC(15-MHDA) [sn2]            | 1.25 | 0.84 | 1.85 | 2.68E-01 | 1.7E-02 | 1.13 |
| 444 | phosphatidylethanolamine        | PE(16:1_20:4)                 | 0.89 | 0.72 | 1.10 | 2.69E-01 | 2.1E-03 | 0.74 |
| 445 | phosphatidylserine              | PS(40:6)                      | 1.35 | 0.79 | 2.31 | 2.70E-01 | 1.7E-01 | 1.06 |
| 446 | alkenylphosphatidylethanolamine | PE(P-18:1/22:5) (a)           | 0.82 | 0.58 | 1.16 | 2.73E-01 | 9.3E-01 | 0.99 |
| 447 | triacylglycerol                 | TG(54:5) [SIM]                | 1.22 | 0.85 | 1.75 | 2.74E-01 | 1.7E-01 | 0.93 |
| 448 | phosphatidylcholine             | PC(18:0_20:4)                 | 1.34 | 0.79 | 2.29 | 2.74E-01 | 9.1E-02 | 1.07 |
| 449 | alkenylphosphatidylcholine      | PC(P-17:0/20:4) (a)           | 1.21 | 0.86 | 1.70 | 2.75E-01 | 7.1E-04 | 1.21 |
| 450 | deoxyceramide                   | Cer(m18:1/18:0)               | 0.88 | 0.69 | 1.11 | 2.76E-01 | 5.5E-02 | 0.83 |
| 451 | dihydroceramide                 | Cer(d18:0/22:0)               | 0.83 | 0.59 | 1.16 | 2.78E-01 | 4.9E-02 | 0.88 |
| 452 | ceramide                        | Cer(d20:1/23:0)               | 1.25 | 0.83 | 1.89 | 2.81E-01 | 4.5E-02 | 1.12 |
| 453 | phosphatidylethanolamine        | PE(15-MHDA_18:1)              | 1.18 | 0.87 | 1.59 | 2.82E-01 | 2.3E-01 | 0.92 |
| 454 | phosphatidylinositol            | PI(18:0_22:6)                 | 0.82 | 0.57 | 1.18 | 2.83E-01 | 4.8E-02 | 0.88 |
| 455 | lysophosphatidylcholine         | LPC(19:0) (a) [sn1] [104_sn1] | 0.84 | 0.60 | 1.16 | 2.83E-01 | 3.2E-01 | 1.06 |
| 456 | phosphatidylethanolamine        | PE(38:5) (a)                  | 1.15 | 0.89 | 1.50 | 2.83E-01 | 8.9E-02 | 0.87 |
| 457 | lysophosphatidylcholine         | LPC(20:2) [sn2]               | 0.72 | 0.39 | 1.32 | 2.83E-01 | 4.7E-01 | 1.03 |
| 458 | alkenylphosphatidylethanolamine | PE(P-17:0/22:6) (a)           | 0.81 | 0.55 | 1.19 | 2.86E-01 | 6.8E-01 | 0.98 |
| 459 | lysophosphatidylcholine         | LPC(19:1) (b)                 | 1.38 | 0.77 | 2.49 | 2.86E-01 | 8.8E-03 | 1.09 |
| 460 | ceramide                        | Cer(d19:1/24:0)               | 1.17 | 0.88 | 1.57 | 2.87E-01 | 1.2E-02 | 1.20 |
| 461 | triacylglycerol                 | TG(51:1) [SIM]                | 0.88 | 0.70 | 1.11 | 2.87E-01 | 2.5E-07 | 0.64 |
| 462 | free fatty acid                 | FA(16:2)                      | 1.13 | 0.90 | 1.42 | 2.89E-01 | 8.9E-01 | 1.01 |
| 463 | ceramide                        | Cer(d16:1/20:0)               | 1.19 | 0.86 | 1.64 | 2.89E-01 | 9.9E-01 | 1.00 |
| 464 | monoalkyldiacylglycerol         | TG(O-54:4) [SIM]              | 0.80 | 0.53 | 1.22 | 2.90E-01 | 7.8E-07 | 0.78 |
| 465 | phosphatidylcholine             | PC(33:1)                      | 0.71 | 0.38 | 1.35 | 2.92E-01 | 4.9E-01 | 0.97 |
| 466 | phosphatidylethanolamine        | PE(18:0_20:3) (a)             | 0.86 | 0.66 | 1.14 | 2.94E-01 | 5.4E-06 | 0.71 |
| 467 | phosphatidylinositol            | PI(38:6)                      | 0.83 | 0.59 | 1.17 | 2.94E-01 | 4.8E-04 | 0.80 |
| 468 | cholesterol ester               | CE(20:4)                      | 1.28 | 0.80 | 2.06 | 2.96E-01 | 1.7E-06 | 1.23 |
| 469 | monoalkyldiacylglycerol         | TG(O-50:1) [NL-18:1]          | 0.87 | 0.66 | 1.14 | 3.04E-01 | 3.5E-04 | 0.75 |
| 470 | monoalkyldiacylglycerol         | TG(O-50:1) [NL-15:0]          | 0.84 | 0.59 | 1.18 | 3.06E-01 | 2.9E-04 | 0.80 |
| 471 | ceramide                        | Cer(d18:1/14:0)               | 1.27 | 0.80 | 2.00 | 3.08E-01 | 3.2E-01 | 1.05 |
| 472 | ceramide                        | Cer(d20:1/22:0)               | 1.21 | 0.84 | 1.74 | 3.08E-01 | 9.0E-02 | 1.11 |
| 473 | lysophosphatidylcholine         | LPC(24:0) [sn1]               | 0.80 | 0.51 | 1.24 | 3.09E-01 | 3.0E-01 | 0.95 |
| 474 | phosphatidylethanolamine        | PE(16:0_22:6)                 | 1.15 | 0.88 | 1.49 | 3.09E-01 | 2.8E-01 | 0.91 |
| 475 | monoalkyldiacylglycerol         | TG(O-52:2) [NL-17:1]          | 0.86 | 0.64 | 1.16 | 3.11E-01 | 2.5E-04 | 0.75 |
| 476 | ceramide                        | Cer(d18:1/22:0)               | 1.34 | 0.76 | 2.33 | 3.13E-01 | 3.7E-01 | 1.04 |
| 477 | alkenylphosphatidylcholine      | PC(P-16:0/16:1)               | 1.34 | 0.76 | 2.34 | 3.13E-01 | 2.5E-06 | 1.20 |
| 478 | phosphatidylethanolamine        | PE(18:0_18:2)                 | 0.84 | 0.60 | 1.18 | 3.17E-01 | 1.1E-06 | 0.74 |
| 479 | triacylglycerol                 | TG(54:3) [NL-18:2]            | 1.16 | 0.87 | 1.56 | 3.19E-01 | 1.1E-01 | 0.90 |
| 480 | sphingomyelin                   | SM(d17:1/14:0)                | 1.26 | 0.80 | 2.00 | 3.20E-01 | 2.5E-02 | 1.11 |
| 481 | monoalkyldiacylglycerol         | TG(O-50:1) [SIM]              | 0.82 | 0.56 | 1.22 | 3.22E-01 | 9.7E-04 | 0.82 |
| 482 | alkylphosphatidylcholine        | PC(O-32:2)                    | 0.86 | 0.64 | 1.16 | 3.22E-01 | 1.5E-01 | 1.11 |
| 483 | monoalkyldiacylglycerol         | TG(O-52:1) [NL-18:1]          | 0.88 | 0.69 | 1.13 | 3.24E-01 | 4.4E-04 | 0.72 |
| 484 | ubiquinone                      | Ubiquinone                    | 0.82 | 0.55 | 1.22 | 3.25E-01 | 2.4E-01 | 1.07 |
| 485 | phosphatidylcholine             | PC(18:1_18:1)                 | 1.42 | 0.71 | 2.87 | 3.25E-01 | 9.5E-03 | 1.09 |
| 486 | ceramide                        | Cer(d18:2/24:0)               | 0.79 | 0.50 | 1.26 | 3.26E-01 | 4.8E-02 | 0.90 |
| 487 | sphingomyelin                   | SM(d18:1/24:0)                | 0.75 | 0.42 | 1.33 | 3.27E-01 | 9.8E-02 | 1.07 |
| 488 | phosphatidylcholine             | PC(15:0_20:3)                 | 0.79 | 0.49 | 1.26 | 3.28E-01 | 5.7E-01 | 0.98 |
| 489 | monoalkyldiacylglycerol         | TG(O-54:4) [NL-17:1]          | 1.20 | 0.84 | 1.72 | 3.28E-01 | 1.2E-01 | 0.91 |
| 490 | phosphatidylcholine             | PC(18:0_22:5) (n6)            | 1.13 | 0.87 | 1.47 | 3.35E-01 | 4.9E-01 | 1.06 |
| 491 | phosphatidylinositol            | PI(38:5) (a)                  | 0.79 | 0.49 | 1.27 | 3.37E-01 | 2.8E-04 | 0.85 |
| 492 | alkenylphosphatidylethanolamine | PE(P-19:0/20:4) (a)           | 0.89 | 0.70 | 1.13 | 3.37E-01 | 5.4E-01 | 1.05 |
| 493 | phosphatidylcholine             | PC(44:12)                     | 0.92 | 0.77 | 1.09 | 3.38E-01 | 4.7E-01 | 0.92 |
| 494 | ceramide                        | Cer(d16:1/23:0)               | 0.84 | 0.59 | 1.19 | 3.38E-01 | 1.6E-03 | 0.82 |
| 495 | phosphatidylethanolamine        | PE(18:0_22:4)                 | 0.90 | 0.73 | 1.11 | 3.39E-01 | 7.2E-03 | 0.77 |
| 496 | alkenylphosphatidylcholine      | PC(P-16:0/22:6)               | 0.78 | 0.46 | 1.31 | 3.40E-01 | 8.1E-01 | 1.01 |
| 497 | lysophosphatidylinositol        | LPI(18:1) [sn2]               | 0.89 | 0.69 | 1.13 | 3.40E-01 | 3.6E-01 | 0.92 |
| 498 | phosphatidylethanolamine        | PE(17:0_22:6)                 | 1.12 | 0.88 | 1.43 | 3.42E-01 | 1.2E-01 | 0.86 |

|     |                                    |                                 |      |      |      |          |         |      |
|-----|------------------------------------|---------------------------------|------|------|------|----------|---------|------|
| 499 | monoalkyl diacylglycerol           | TG(O-50:2) [NL-18:2]            | 0.86 | 0.63 | 1.17 | 3.42E-01 | 4.7E-02 | 0.87 |
| 500 | lysophosphatidylinositol           | LPI(20:4) [sn1]                 | 1.20 | 0.82 | 1.76 | 3.44E-01 | 2.4E-01 | 1.07 |
| 501 | alkylphosphatidylethanolamine      | PE(O-18:0/20:4)                 | 0.88 | 0.68 | 1.15 | 3.51E-01 | 6.1E-01 | 0.96 |
| 502 | diacylglycerol                     | DG(18:1_18:3)                   | 1.15 | 0.86 | 1.53 | 3.54E-01 | 1.4E-04 | 0.75 |
| 503 | cholesterol ester                  | CE(18:3)                        | 0.86 | 0.63 | 1.18 | 3.56E-01 | 1.8E-03 | 1.23 |
| 504 | lysophosphatidylcholine            | LPC(17:1) [sn1] (a) / LPC(17:1) | 0.78 | 0.46 | 1.33 | 3.60E-01 | 4.9E-01 | 1.03 |
| 505 | monoalkyl diacylglycerol           | TG(O-52:1) [SIM]                | 0.85 | 0.60 | 1.21 | 3.62E-01 | 5.9E-04 | 0.80 |
| 506 | phosphatidylcholine                | PC(20:0_20:4)                   | 1.23 | 0.79 | 1.93 | 3.63E-01 | 4.5E-01 | 1.03 |
| 507 | alkenylphosphatidylethanolamine    | PE(P-18:0/18:3)                 | 0.89 | 0.69 | 1.15 | 3.63E-01 | 7.3E-01 | 1.03 |
| 508 | lysalkylphosphatidylcholine        | LPC(O-18:0)                     | 1.18 | 0.83 | 1.69 | 3.67E-01 | 1.5E-02 | 1.15 |
| 509 | sphingomyelin                      | SM(d18:2/23:0)                  | 1.33 | 0.71 | 2.47 | 3.71E-01 | 5.6E-04 | 1.12 |
| 510 | sphingomyelin                      | SM(41:0)                        | 0.75 | 0.39 | 1.42 | 3.71E-01 | 2.1E-01 | 1.04 |
| 511 | triacylglycerol                    | TG(54:4) [NL-20:3]              | 0.87 | 0.64 | 1.19 | 3.72E-01 | 1.3E-04 | 0.77 |
| 512 | phosphatidylethanolamine           | PE(16:1_18:2)                   | 0.89 | 0.70 | 1.15 | 3.73E-01 | 7.7E-04 | 0.76 |
| 513 | lysophosphatidylcholine            | LPC(19:0) [sn1] (b)             | 0.82 | 0.52 | 1.28 | 3.74E-01 | 9.0E-01 | 1.01 |
| 514 | alkenylphosphatidylcholine         | PC(P-16:0/14:0)                 | 1.26 | 0.76 | 2.07 | 3.74E-01 | 3.2E-04 | 1.17 |
| 515 | phosphatidylethanolamine           | PE(20:0_20:4)                   | 0.88 | 0.66 | 1.17 | 3.74E-01 | 9.7E-08 | 0.68 |
| 516 | phosphatidylcholine                | PC(38:2)                        | 0.70 | 0.31 | 1.56 | 3.77E-01 | 6.0E-01 | 1.02 |
| 517 | phosphatidylcholine                | PC(17:1_18:2)                   | 1.26 | 0.75 | 2.11 | 3.82E-01 | 5.2E-02 | 1.08 |
| 518 | lysophosphatidylcholine            | LPC(20:2) [sn1]                 | 0.78 | 0.45 | 1.37 | 3.84E-01 | 7.2E-01 | 1.01 |
| 519 | alkenylphosphatidylethanolamine    | PE(P-18:1/18:1) (b)             | 0.88 | 0.65 | 1.18 | 3.90E-01 | 6.7E-02 | 1.14 |
| 520 | cholesterol ester                  | CE(24:5)                        | 1.14 | 0.84 | 1.55 | 3.96E-01 | 2.8E-01 | 1.08 |
| 521 | phosphatidylcholine                | PC(31:0) (b)                    | 1.24 | 0.76 | 2.02 | 3.98E-01 | 1.0E-01 | 1.08 |
| 522 | desmosterol                        | DE(18:1)                        | 0.88 | 0.64 | 1.20 | 4.10E-01 | 1.4E-01 | 1.11 |
| 523 | triacylglycerol                    | TG(56:7) [NL-20:5]              | 0.91 | 0.72 | 1.14 | 4.10E-01 | 1.7E-02 | 0.80 |
| 524 | triacylglycerol                    | TG(58:10) [NL-22:6]             | 0.94 | 0.80 | 1.09 | 4.14E-01 | 8.8E-04 | 0.63 |
| 525 | alkenylphosphatidylethanolamine    | PE(P-18:1/22:6) (a)             | 0.89 | 0.68 | 1.17 | 4.14E-01 | 5.5E-01 | 0.95 |
| 526 | triacylglycerol                    | TG(51:2) [NL-17:0]              | 0.90 | 0.69 | 1.17 | 4.20E-01 | 1.6E-04 | 0.76 |
| 527 | triacylglycerol                    | TG(51:2) [NL-17:1]              | 0.90 | 0.69 | 1.17 | 4.20E-01 | 1.6E-04 | 0.76 |
| 528 | lysalkenylphosphatidylethanolamine | LPE(P-20:0)                     | 0.86 | 0.59 | 1.25 | 4.20E-01 | 3.7E-01 | 1.05 |
| 529 | triacylglycerol                    | TG(52:5) [NL-18:3]              | 0.92 | 0.74 | 1.13 | 4.21E-01 | 3.8E-07 | 0.62 |
| 530 | monoalkyl diacylglycerol           | TG(O-52:2) [SIM]                | 0.86 | 0.58 | 1.26 | 4.24E-01 | 6.8E-04 | 0.82 |
| 531 | monoalkyl diacylglycerol           | TG(O-52:2) [NL-18:1]            | 0.88 | 0.65 | 1.20 | 4.27E-01 | 1.2E-03 | 0.79 |
| 532 | phosphatidylcholine                | PC(16:1_18:2)                   | 0.82 | 0.50 | 1.34 | 4.27E-01 | 5.7E-01 | 0.97 |
| 533 | lysophosphatidylinositol           | LPI(18:0) [sn2]                 | 0.95 | 0.82 | 1.09 | 4.33E-01 | 4.0E-01 | 1.13 |
| 534 | phosphatidylinositol               | PI(34:0)                        | 0.90 | 0.70 | 1.17 | 4.34E-01 | 2.2E-01 | 0.90 |
| 535 | alkenylphosphatidylethanolamine    | PE(P-16:0/22:4)                 | 1.13 | 0.83 | 1.54 | 4.36E-01 | 2.0E-02 | 1.16 |
| 536 | lysophosphatidylcholine            | LPC(15:0) [sn2]                 | 0.83 | 0.51 | 1.34 | 4.43E-01 | 6.2E-01 | 0.98 |
| 537 | phosphatidylcholine                | PC(38:5) (b)                    | 0.86 | 0.59 | 1.26 | 4.44E-01 | 3.9E-02 | 0.89 |
| 538 | cholesterol ester                  | CE(20:2)                        | 1.29 | 0.67 | 2.50 | 4.46E-01 | 3.4E-05 | 1.15 |
| 539 | triacylglycerol                    | TG(50:3) [NL-16:1]              | 0.90 | 0.68 | 1.18 | 4.48E-01 | 4.8E-03 | 0.82 |
| 540 | GM3 ganglioside                    | GM3(d18:1/20:0)                 | 1.16 | 0.79 | 1.69 | 4.49E-01 | 3.1E-07 | 1.34 |
| 541 | phosphatidylcholine                | PC(17:0_22:6)                   | 1.13 | 0.82 | 1.55 | 4.49E-01 | 7.0E-01 | 1.03 |
| 542 | triacylglycerol                    | TG(54:2) [NL-20:1]              | 1.10 | 0.85 | 1.43 | 4.50E-01 | 1.4E-03 | 0.79 |
| 543 | lysophosphatidylcholine            | LPC(15-MHDA) [sn1] / LPC(17:1)  | 1.19 | 0.75 | 1.88 | 4.61E-01 | 1.6E-02 | 1.11 |
| 544 | phosphatidylethanolamine           | PE(18:1_22:6) (a)               | 1.08 | 0.88 | 1.31 | 4.63E-01 | 7.3E-02 | 0.82 |
| 545 | monoalkyl diacylglycerol           | TG(O-50:3) [SIM]                | 0.82 | 0.48 | 1.40 | 4.64E-01 | 6.7E-01 | 0.98 |
| 546 | diacylglycerol                     | DG(16:0_18:1)                   | 0.91 | 0.72 | 1.16 | 4.69E-01 | 6.5E-07 | 0.67 |
| 547 | phosphatidylcholine                | PC(18:0_22:4)                   | 0.88 | 0.63 | 1.24 | 4.78E-01 | 4.0E-01 | 0.95 |
| 548 | phosphatidylethanolamine           | PE(18:0_20:4)                   | 1.11 | 0.83 | 1.48 | 4.80E-01 | 5.1E-02 | 0.86 |
| 549 | alkenylphosphatidylcholine         | PC(P-16:0/18:3)                 | 0.89 | 0.65 | 1.22 | 4.81E-01 | 4.8E-02 | 1.15 |
| 550 | cholesterol ester                  | CE(18:0)                        | 0.81 | 0.45 | 1.46 | 4.81E-01 | 4.6E-01 | 1.03 |
| 551 | phosphatidylinositol               | PI(18:0_22:5) (n6)              | 1.12 | 0.81 | 1.56 | 4.85E-01 | 8.7E-01 | 1.01 |
| 552 | alkenylphosphatidylcholine         | PC(P-18:0/22:6)                 | 1.22 | 0.70 | 2.14 | 4.86E-01 | 5.7E-02 | 1.07 |
| 553 | ceramide                           | Cer(d18:1/17:0)                 | 1.14 | 0.78 | 1.67 | 4.88E-01 | 5.0E-03 | 1.17 |
| 554 | alkenylphosphatidylethanolamine    | PE(P-20:1/22:6)                 | 1.11 | 0.83 | 1.48 | 4.88E-01 | 2.8E-01 | 1.08 |
| 555 | sphingosine-1-phosphate            | S1P(d18:0)                      | 1.20 | 0.71 | 2.02 | 4.88E-01 | 8.4E-03 | 1.13 |
| 556 | GM3 ganglioside                    | GM3(d18:1/22:0)                 | 0.85 | 0.54 | 1.34 | 4.90E-01 | 1.2E-03 | 1.17 |
| 557 | triacylglycerol                    | TG(50:4) [NL-14:0]              | 0.94 | 0.80 | 1.11 | 4.93E-01 | 9.9E-10 | 0.49 |
| 558 | alkenylphosphatidylcholine         | PC(P-18:0/18:2)                 | 1.13 | 0.79 | 1.63 | 4.95E-01 | 2.3E-03 | 1.20 |
| 559 | triacylglycerol                    | TG(54:6) [NL-20:4]              | 0.90 | 0.67 | 1.21 | 4.95E-01 | 2.3E-02 | 0.84 |
| 560 | alkylphosphatidylcholine           | PC(O-34:2)                      | 0.89 | 0.63 | 1.25 | 4.95E-01 | 1.5E-02 | 1.16 |
| 561 | phosphatidylcholine                | PC(38:4) (b)                    | 0.85 | 0.54 | 1.35 | 4.98E-01 | 4.0E-01 | 0.96 |
| 562 | lysophosphatidylcholine            | LPC(18:1) [sn2]                 | 0.83 | 0.48 | 1.43 | 5.00E-01 | 5.5E-01 | 1.02 |
| 563 | alkenylphosphatidylethanolamine    | PE(P-18:1/22:5) (b)             | 1.10 | 0.83 | 1.45 | 5.00E-01 | 7.3E-02 | 1.15 |
| 564 | alkylphosphatidylcholine           | PC(O-18:0/18:2)                 | 1.16 | 0.75 | 1.79 | 5.01E-01 | 4.6E-04 | 1.19 |
| 565 | lysophosphatidylethanolamine       | LPE(20:4) [sn2]                 | 1.14 | 0.78 | 1.65 | 5.02E-01 | 7.1E-01 | 1.02 |
| 566 | lysophosphatidylinositol           | LPI(18:2) [sn2]                 | 0.89 | 0.62 | 1.27 | 5.03E-01 | 5.6E-01 | 1.04 |
| 567 | phosphatidylcholine                | PC(18:1_18:2)                   | 1.15 | 0.76 | 1.76 | 5.04E-01 | 6.8E-02 | 1.10 |
| 568 | phosphatidylcholine                | PC(33:2)                        | 1.18 | 0.72 | 1.94 | 5.04E-01 | 2.7E-01 | 1.05 |
| 569 | alkenylphosphatidylcholine         | PC(P-38:5) (a)                  | 1.21 | 0.69 | 2.12 | 5.06E-01 | 4.8E-04 | 1.15 |
| 570 | alkylphosphatidylcholine           | PC(O-18:1/18:2)                 | 1.15 | 0.75 | 1.76 | 5.14E-01 | 4.8E-04 | 1.19 |
| 571 | phosphatidylinositol               | PI(17:0_18:1)                   | 0.89 | 0.61 | 1.28 | 5.15E-01 | 7.2E-01 | 1.02 |
| 572 | lysalkylphosphatidylcholine        | LPC(O-20:1)                     | 1.10 | 0.83 | 1.46 | 5.19E-01 | 1.0E-02 | 1.20 |
| 573 | cholesterol ester                  | CE(22:6) [+OH]                  | 0.96 | 0.85 | 1.09 | 5.19E-01 | 4.7E-01 | 1.13 |
| 574 | lysalkenylphosphatidylcholine      | LPC(P-17:0) (b)                 | 0.90 | 0.66 | 1.23 | 5.21E-01 | 5.6E-02 | 1.13 |
| 575 | phosphatidylinositol               | PI(36:2)                        | 1.14 | 0.77 | 1.68 | 5.23E-01 | 4.9E-01 | 0.96 |
| 576 | phosphatidylethanolamine           | PE(18:1_18:1)                   | 0.93 | 0.74 | 1.17 | 5.32E-01 | 9.8E-06 | 0.66 |
| 577 | cholesterol ester                  | CE(17:0)                        | 1.19 | 0.68 | 2.08 | 5.33E-01 | 2.6E-03 | 1.12 |
| 578 | GM3 ganglioside                    | GM3(d18:1/18:0)                 | 1.14 | 0.76 | 1.70 | 5.34E-01 | 3.0E-04 | 1.20 |
| 579 | alkenylphosphatidylcholine         | PC(P-18:1/22:6)                 | 1.15 | 0.75 | 1.76 | 5.34E-01 | 1.2E-02 | 1.13 |
| 580 | alkylphosphatidylcholine           | PC(O-16:0/22:6)                 | 0.87 | 0.56 | 1.35 | 5.35E-01 | 7.2E-01 | 1.02 |
| 581 | lysophosphatidylcholine            | LPC(19:1) (c)                   | 1.20 | 0.67 | 2.14 | 5.37E-01 | 8.9E-02 | 1.06 |
| 582 | alkylphosphatidylcholine           | PC(O-40:7) (b)                  | 1.12 | 0.77 | 1.63 | 5.39E-01 | 3.6E-04 | 1.23 |

|     |                                 |                            |      |      |      |          |         |      |
|-----|---------------------------------|----------------------------|------|------|------|----------|---------|------|
| 583 | lysalkylphosphatidylcholine     | LPC(O-24:2)                | 0.91 | 0.69 | 1.22 | 5.40E-01 | 2.7E-01 | 1.08 |
| 584 | triacylglycerol                 | TG(56:8) [NL-22:6]         | 0.94 | 0.79 | 1.14 | 5.42E-01 | 1.9E-02 | 0.76 |
| 585 | alkylphosphatidylcholine        | PC(O-40:7) (a)             | 1.13 | 0.77 | 1.65 | 5.42E-01 | 1.6E-01 | 1.08 |
| 586 | phosphatidylinositol            | PI (38:5) (b)              | 1.14 | 0.74 | 1.76 | 5.47E-01 | 1.1E-01 | 0.92 |
| 587 | diacylglycerol                  | DG(18:0_22:6)              | 1.12 | 0.78 | 1.60 | 5.49E-01 | 1.5E-03 | 1.21 |
| 588 | alkenylphosphatidylcholine      | PC(P-16:0/18:2)            | 0.83 | 0.45 | 1.52 | 5.50E-01 | 2.8E-03 | 1.12 |
| 589 | dihydroceramide                 | Cer(d18:0/16:0)            | 1.17 | 0.70 | 1.97 | 5.50E-01 | 1.2E-01 | 1.07 |
| 590 | lysoalkenylphosphatidylcholine  | LPC(P-16:0)                | 0.86 | 0.53 | 1.41 | 5.51E-01 | 9.0E-02 | 1.07 |
| 591 | cholesterol ester               | CE(22:6)                   | 1.08 | 0.84 | 1.38 | 5.52E-01 | 3.2E-04 | 1.36 |
| 592 | alkylphosphatidylethanolamine   | PE(O-16:0/22:4)            | 0.93 | 0.73 | 1.18 | 5.53E-01 | 2.5E-01 | 1.09 |
| 593 | sphingomyelin                   | SM(d16:1/23:0)/SM(d17:1/2  | 1.20 | 0.65 | 2.20 | 5.60E-01 | 3.1E-02 | 1.08 |
| 594 | triacylglycerol                 | TG(56:7) [NL-22:6]         | 0.93 | 0.71 | 1.20 | 5.61E-01 | 7.9E-02 | 0.87 |
| 595 | monohexosylceramide             | HexCer(d18:1/24:0)         | 1.15 | 0.72 | 1.84 | 5.63E-01 | 1.3E-01 | 1.08 |
| 596 | lysalkylphosphatidylcholine     | LPC(O-16:0)                | 0.88 | 0.56 | 1.37 | 5.65E-01 | 8.9E-02 | 1.08 |
| 597 | lysophosphatidylcholine         | LPC(15:0) [sn1]            | 0.86 | 0.51 | 1.44 | 5.66E-01 | 7.9E-01 | 0.99 |
| 598 | lysophosphatidylinositol        | LI(18:0) [sn1]             | 0.95 | 0.79 | 1.14 | 5.67E-01 | 2.5E-01 | 1.14 |
| 599 | triacylglycerol                 | TG(50:3) [NL-18:2]         | 0.91 | 0.65 | 1.27 | 5.68E-01 | 4.6E-05 | 0.79 |
| 600 | phosphatidylcholine             | PC(38:5) (a)               | 1.17 | 0.68 | 2.03 | 5.68E-01 | 3.8E-01 | 1.04 |
| 601 | lysophosphatidylcholine         | LPC(22:5) [sn1] (n6)       | 1.10 | 0.79 | 1.54 | 5.68E-01 | 4.2E-01 | 1.05 |
| 602 | ceramide                        | Cer(d17:1/23:0)            | 1.12 | 0.76 | 1.63 | 5.69E-01 | 3.6E-01 | 0.95 |
| 603 | phosphatidylinositol            | PI(18:0_20:4)              | 0.85 | 0.49 | 1.48 | 5.72E-01 | 4.3E-03 | 0.88 |
| 604 | triacylglycerol                 | TG(50:3) [NL-14:0]         | 1.10 | 0.80 | 1.51 | 5.73E-01 | 2.4E-07 | 0.73 |
| 605 | deoxyceramide                   | Cer(m18:1/24:1)            | 0.92 | 0.70 | 1.22 | 5.74E-01 | 4.0E-02 | 0.84 |
| 606 | phosphatidylcholine             | PC(16:0_16:0)              | 1.26 | 0.56 | 2.86 | 5.75E-01 | 2.3E-02 | 1.06 |
| 607 | triacylglycerol                 | TG(50:3) [NL-14:1]         | 1.08 | 0.83 | 1.40 | 5.84E-01 | 2.0E-04 | 0.77 |
| 608 | desmosterol                     | DE(22:6)                   | 0.94 | 0.77 | 1.16 | 5.87E-01 | 1.3E-01 | 1.16 |
| 609 | triacylglycerol                 | TG(56:9) [NL-22:6]         | 0.96 | 0.82 | 1.12 | 5.87E-01 | 4.3E-04 | 0.62 |
| 610 | monoalkyldiacylglycerol         | TG(O-54:3) [NL-17:1]       | 1.11 | 0.76 | 1.64 | 5.90E-01 | 3.6E-02 | 0.89 |
| 611 | lysophosphatidylcholine         | LPC(17:0) [sn1]            | 1.15 | 0.69 | 1.91 | 5.97E-01 | 2.7E-02 | 1.10 |
| 612 | triacylglycerol                 | TG(50:2) [NL-18:1]         | 0.91 | 0.64 | 1.29 | 5.98E-01 | 2.3E-04 | 0.81 |
| 613 | lysophosphatidylcholine         | LPC(18:2) [+OH]            | 0.97 | 0.87 | 1.08 | 5.98E-01 | 3.1E-01 | 1.23 |
| 614 | phosphatidylethanolamine        | PE(16:0_18:1)              | 0.93 | 0.72 | 1.21 | 6.02E-01 | 2.3E-03 | 0.79 |
| 615 | phosphatidylcholine             | PC(17:0_18:1)              | 1.17 | 0.65 | 2.11 | 6.03E-01 | 2.9E-02 | 1.08 |
| 616 | free fatty acid                 | FA(20:5)                   | 0.90 | 0.59 | 1.36 | 6.04E-01 | 8.8E-01 | 1.01 |
| 617 | ceramide                        | Cer(d18:2/22:0)            | 1.12 | 0.73 | 1.69 | 6.06E-01 | 2.4E-01 | 0.94 |
| 618 | lysophosphatidylcholine         | LPC(17:1) [sn1] (b)        | 0.84 | 0.43 | 1.63 | 6.06E-01 | 3.6E-01 | 1.03 |
| 619 | dihydroceramide                 | Cer(d18:0/20:0)            | 1.09 | 0.79 | 1.51 | 6.07E-01 | 1.9E-01 | 1.09 |
| 620 | phosphatidylinositol            | PI(18:1_18:2)              | 1.09 | 0.79 | 1.48 | 6.08E-01 | 4.7E-01 | 0.95 |
| 621 | diacylglycerol                  | DG(16:0_18:2)              | 0.93 | 0.69 | 1.24 | 6.11E-01 | 2.2E-06 | 0.72 |
| 622 | diacylglycerol                  | DG(18:2_20:4)              | 1.04 | 0.91 | 1.18 | 6.11E-01 | 1.4E-02 | 0.65 |
| 623 | phosphatidylglycerol            | PG(34:1)                   | 0.93 | 0.70 | 1.24 | 6.14E-01 | 3.4E-06 | 0.72 |
| 624 | alkenylphosphatidylcholine      | PC(P-18:0/20:4)            | 1.10 | 0.76 | 1.59 | 6.14E-01 | 9.7E-03 | 1.15 |
| 625 | ceramide                        | Cer(d17:1/24:0)            | 0.90 | 0.59 | 1.37 | 6.17E-01 | 3.6E-01 | 0.95 |
| 626 | phosphatidylethanolamine        | PE(17:0_18:2)              | 1.09 | 0.77 | 1.56 | 6.23E-01 | 3.8E-03 | 0.84 |
| 627 | triacylglycerol                 | TG(58:8) [SIM]             | 1.06 | 0.84 | 1.33 | 6.23E-01 | 7.6E-01 | 0.97 |
| 628 | cholesterol ester               | CE(18:2) [+OH]             | 0.96 | 0.80 | 1.14 | 6.25E-01 | 8.0E-02 | 1.24 |
| 629 | sphingomyelin                   | SM(d18:2/14:0)             | 0.86 | 0.46 | 1.60 | 6.30E-01 | 2.1E-01 | 1.04 |
| 630 | lysophosphatidylethanolamine    | LE(20:4) [sn1]             | 1.09 | 0.76 | 1.56 | 6.33E-01 | 7.1E-01 | 1.02 |
| 631 | cholesterol ester               | CE(16:2)                   | 0.91 | 0.63 | 1.33 | 6.33E-01 | 9.2E-04 | 1.23 |
| 632 | cholesterol ester               | CE(22:5) (n3)              | 1.10 | 0.73 | 1.67 | 6.35E-01 | 4.9E-04 | 1.19 |
| 633 | lysoalkenylphosphatidylcholine  | LPC(P-20:0)                | 1.08 | 0.78 | 1.51 | 6.37E-01 | 2.2E-02 | 1.16 |
| 634 | triacylglycerol                 | TG(54:6) [NL-18:3]         | 1.04 | 0.89 | 1.22 | 6.37E-01 | 2.1E-03 | 0.68 |
| 635 | diacylglycerol                  | DG(18:0_18:1)              | 0.94 | 0.72 | 1.22 | 6.38E-01 | 9.4E-06 | 0.71 |
| 636 | monoalkyldiacylglycerol         | TG(O-54:2) [NL-18:1]       | 0.93 | 0.69 | 1.26 | 6.39E-01 | 5.8E-03 | 0.81 |
| 637 | alkenylphosphatidylcholine      | PC(P-15:0/20:4) (b)        | 0.94 | 0.72 | 1.22 | 6.39E-01 | 3.7E-01 | 1.07 |
| 638 | alkenylphosphatidylethanolamine | PE(P-20:0/18:1)            | 0.92 | 0.64 | 1.31 | 6.41E-01 | 1.1E-01 | 1.09 |
| 639 | triacylglycerol                 | TG(54:6) [SIM]             | 0.95 | 0.75 | 1.20 | 6.41E-01 | 2.9E-04 | 0.74 |
| 640 | phosphatidic acid               | PA(36:2)                   | 1.08 | 0.78 | 1.48 | 6.50E-01 | 7.7E-01 | 1.02 |
| 641 | phosphatidylethanolamine        | PE(18:1_18:2)              | 0.93 | 0.70 | 1.25 | 6.50E-01 | 1.1E-04 | 0.76 |
| 642 | free fatty acid                 | FA(22:6)                   | 1.06 | 0.82 | 1.38 | 6.57E-01 | 4.1E-01 | 1.06 |
| 643 | dihydroceramide                 | Cer(d18:0/24:1)            | 1.08 | 0.77 | 1.50 | 6.60E-01 | 1.6E-01 | 1.10 |
| 644 | phosphatidic acid               | PA(36:3)                   | 1.07 | 0.78 | 1.47 | 6.64E-01 | 2.6E-01 | 1.08 |
| 645 | triacylglycerol                 | TG(56:8) [SIM]             | 0.96 | 0.79 | 1.16 | 6.66E-01 | 8.0E-03 | 0.74 |
| 646 | triacylglycerol                 | TG(52:5) [SIM]             | 0.95 | 0.73 | 1.22 | 6.67E-01 | 1.3E-06 | 0.69 |
| 647 | sphingomyelin                   | SM(d18:2/24:0)             | 1.14 | 0.63 | 2.06 | 6.68E-01 | 8.0E-04 | 1.13 |
| 648 | phosphatidylcholine             | PC(16:0_18:1)              | 1.25 | 0.45 | 3.46 | 6.71E-01 | 2.9E-02 | 1.05 |
| 649 | alkenylphosphatidylethanolamine | PE(P-20:0/18:2)            | 0.92 | 0.63 | 1.34 | 6.72E-01 | 5.1E-01 | 1.04 |
| 650 | triacylglycerol                 | TG(50:2) [NL-14:0]         | 1.07 | 0.79 | 1.45 | 6.73E-01 | 5.8E-04 | 0.80 |
| 651 | phosphatidic acid               | PA(40:6)                   | 0.93 | 0.66 | 1.31 | 6.73E-01 | 6.1E-01 | 1.03 |
| 652 | phosphatidylcholine             | PC(16:0_18:0)              | 1.23 | 0.47 | 3.21 | 6.74E-01 | 2.0E-02 | 1.05 |
| 653 | phosphatidylethanolamine        | PE(38:5) (b)               | 0.95 | 0.73 | 1.23 | 6.77E-01 | 1.8E-04 | 0.74 |
| 654 | triacylglycerol                 | TG(58:8) [NL-22:6]         | 1.03 | 0.89 | 1.20 | 6.78E-01 | 4.3E-01 | 0.89 |
| 655 | ceramide                        | Cer(d16:1/22:0)            | 0.93 | 0.66 | 1.31 | 6.78E-01 | 2.6E-03 | 0.83 |
| 656 | lysoalkylphosphatidylcholine    | LPC(O-24:0)                | 0.88 | 0.50 | 1.58 | 6.80E-01 | 5.8E-01 | 1.02 |
| 657 | monoalkyldiacylglycerol         | TG(O-54:2) [SIM]           | 0.90 | 0.54 | 1.49 | 6.85E-01 | 5.8E-03 | 0.88 |
| 658 | alkenylphosphatidylcholine      | PC(P-15:0/20:4) (a)        | 0.96 | 0.80 | 1.16 | 6.85E-01 | 4.1E-01 | 0.91 |
| 659 | sphingomyelin                   | SM(d18:1/23:0)/SM(d17:1/2  | 0.86 | 0.42 | 1.76 | 6.87E-01 | 3.9E-03 | 1.10 |
| 660 | sulfatide                       | Sulfatide (d18:1/24:1(OH)) | 0.93 | 0.65 | 1.33 | 6.90E-01 | 7.4E-01 | 1.02 |
| 661 | phosphatidic acid               | PA(36:4)                   | 0.94 | 0.68 | 1.29 | 6.93E-01 | 6.6E-01 | 1.03 |
| 662 | alkenylphosphatidylethanolamine | PE(P-18:0/22:5) (n6)       | 1.06 | 0.78 | 1.44 | 6.93E-01 | 1.1E-01 | 1.12 |
| 663 | sphingosine-1-phosphate         | S1P(d16:1)                 | 0.89 | 0.50 | 1.60 | 6.94E-01 | 7.9E-03 | 1.10 |
| 664 | alkylphosphatidylcholine        | PC(O-32:1)                 | 0.88 | 0.47 | 1.66 | 6.95E-01 | 3.4E-02 | 1.07 |
| 665 | phosphatidylcholine             | PC(39:5)(b)                | 1.08 | 0.72 | 1.63 | 6.95E-01 | 7.7E-01 | 1.02 |
| 666 | phosphatidylethanolamine        | PE(16:0_20:4)              | 1.06 | 0.79 | 1.42 | 7.02E-01 | 2.1E-02 | 0.85 |

|     |                                  |                                 |      |      |      |          |         |      |
|-----|----------------------------------|---------------------------------|------|------|------|----------|---------|------|
| 667 | monoalkyl diacylglycerol         | TG(O-50:2) [NL-16:1]            | 0.93 | 0.65 | 1.33 | 7.03E-01 | 4.9E-01 | 1.04 |
| 668 | diacylglycerol                   | DG(16:1_18:1)                   | 0.96 | 0.77 | 1.19 | 7.04E-01 | 1.2E-04 | 0.71 |
| 669 | phosphatidylcholine              | PC(16:1_22:6)                   | 0.94 | 0.67 | 1.31 | 7.10E-01 | 1.3E-01 | 0.90 |
| 670 | dihexosylceramide                | Hex2Cer(d16:1/16:0)             | 1.07 | 0.74 | 1.56 | 7.12E-01 | 1.1E-03 | 1.21 |
| 671 | lysophosphatidylethanolamine     | LPE(17:0) [sn1]                 | 0.92 | 0.59 | 1.43 | 7.13E-01 | 9.5E-02 | 1.09 |
| 672 | monoalkyl diacylglycerol         | TG(O-50:3) [NL-18:2]            | 0.93 | 0.61 | 1.40 | 7.13E-01 | 8.4E-01 | 1.01 |
| 673 | alkenylphosphatidylethanolamine  | PE(P-20:1/20:4)                 | 1.05 | 0.82 | 1.34 | 7.16E-01 | 3.9E-01 | 1.07 |
| 674 | cholesterol ester                | CE(20:3)                        | 1.09 | 0.69 | 1.71 | 7.19E-01 | 1.2E-04 | 1.21 |
| 675 | phosphatidylinositol-1-phosphate | PIP1(38:4)                      | 0.96 | 0.77 | 1.20 | 7.23E-01 | 5.0E-01 | 1.08 |
| 676 | phosphatidylethanolamine         | PE(18:0_22:5) (n6)              | 1.04 | 0.84 | 1.28 | 7.24E-01 | 9.8E-02 | 0.84 |
| 677 | diacylglycerol                   | DG(18:1_20:4)                   | 1.06 | 0.76 | 1.47 | 7.25E-01 | 4.2E-03 | 0.80 |
| 678 | phosphatidylethanolamine         | PE(16:0_18:3) (a)               | 0.96 | 0.74 | 1.24 | 7.29E-01 | 2.1E-03 | 0.78 |
| 679 | monoalkyl diacylglycerol         | TG(O-50:2) [SIM]                | 0.92 | 0.56 | 1.50 | 7.30E-01 | 2.0E-01 | 0.95 |
| 680 | diacylglycerol                   | DG(18:2_22:6)                   | 1.02 | 0.89 | 1.18 | 7.31E-01 | 9.0E-02 | 0.76 |
| 681 | phosphatidylcholine              | PC(38:7)(c)                     | 1.06 | 0.75 | 1.52 | 7.32E-01 | 3.5E-01 | 0.94 |
| 682 | lysophosphatidylcholine          | LPC(22:6) [+OH]                 | 0.98 | 0.87 | 1.10 | 7.33E-01 | 9.9E-02 | 1.33 |
| 683 | triacylglycerol                  | TG(56:7) [SIM]                  | 1.05 | 0.80 | 1.36 | 7.33E-01 | 3.6E-01 | 0.93 |
| 684 | alkenylphosphatidylcholine       | PC(P-16:0/20:4)                 | 0.93 | 0.59 | 1.45 | 7.35E-01 | 5.9E-02 | 1.09 |
| 685 | phosphatidylethanolamine         | PE(17:0_18:1)                   | 1.05 | 0.79 | 1.39 | 7.42E-01 | 4.5E-03 | 0.81 |
| 686 | lysophosphatidylcholine          | LPC(22:4) [sn2]                 | 0.95 | 0.67 | 1.33 | 7.48E-01 | 8.2E-01 | 1.01 |
| 687 | monohexosylceramide              | HexCer(d16:1/22:0)              | 0.94 | 0.64 | 1.38 | 7.52E-01 | 5.1E-01 | 1.04 |
| 688 | phosphatidylcholine              | PC(15:0_22:6)                   | 0.94 | 0.66 | 1.35 | 7.53E-01 | 1.5E-01 | 0.91 |
| 689 | alkenylphosphatidylethanolamine  | PE(P-20:0/20:4)                 | 0.95 | 0.69 | 1.31 | 7.55E-01 | 7.4E-01 | 1.02 |
| 690 | alkenylphosphatidylcholine       | PC(P-17:0/20:4) (b)             | 0.96 | 0.75 | 1.24 | 7.58E-01 | 2.3E-03 | 1.28 |
| 691 | alkenylphosphatidylethanolamine  | PE(P-20:0/22:6)                 | 1.05 | 0.75 | 1.47 | 7.59E-01 | 7.2E-01 | 1.02 |
| 692 | ceramide                         | Cer(d20:1/24:0)                 | 1.07 | 0.71 | 1.61 | 7.60E-01 | 6.8E-01 | 1.02 |
| 693 | lysoalkenylphosphatidylcholine   | LPC(P-17:0) (a)                 | 1.06 | 0.74 | 1.51 | 7.62E-01 | 2.4E-02 | 1.14 |
| 694 | lysophosphatidylcholine          | LPC(19:0) [sn1] (a) / LPC(19:0) | 0.93 | 0.55 | 1.56 | 7.71E-01 | 5.5E-01 | 1.03 |
| 695 | triacylglycerol                  | TG(58:9) [SIM]                  | 0.97 | 0.80 | 1.18 | 7.73E-01 | 5.8E-02 | 0.81 |
| 696 | lysophosphatidylinositol         | LPI(20:4) [sn2]                 | 0.94 | 0.62 | 1.43 | 7.80E-01 | 8.2E-01 | 1.01 |
| 697 | lysophosphatidylethanolamine     | LPE(22:6) [sn2]                 | 1.05 | 0.77 | 1.43 | 7.80E-01 | 9.1E-01 | 0.99 |
| 698 | phosphatidylcholine              | PC(16:0_22:6)                   | 0.94 | 0.61 | 1.44 | 7.83E-01 | 7.5E-01 | 0.98 |
| 699 | cholesterol ester                | CE(22:1)                        | 1.04 | 0.77 | 1.42 | 7.86E-01 | 4.4E-02 | 1.15 |
| 700 | sulfatide                        | Sulfatide (d18:1-/16:0)         | 1.06 | 0.69 | 1.62 | 7.90E-01 | 9.7E-01 | 1.00 |
| 701 | lysophosphatidylcholine          | LPC(22:6) [sn2]                 | 0.95 | 0.66 | 1.37 | 7.90E-01 | 3.9E-01 | 0.95 |
| 702 | desmosterol                      | DE(20:4)                        | 0.97 | 0.76 | 1.23 | 7.90E-01 | 2.9E-02 | 1.20 |
| 703 | lysophosphatidylcholine          | LPC(22:4) [sn1]                 | 0.96 | 0.70 | 1.32 | 7.94E-01 | 5.5E-01 | 1.04 |
| 704 | sphingosine-1-phosphate          | S1P(d18:2)                      | 0.92 | 0.48 | 1.74 | 7.96E-01 | 2.1E-03 | 1.12 |
| 705 | alkenylphosphatidylcholine       | PC(P-35:2)(b)                   | 0.98 | 0.84 | 1.15 | 7.98E-01 | 1.7E-03 | 1.52 |
| 706 | phosphatidylserine               | PS(40:5)                        | 1.09 | 0.54 | 2.20 | 8.02E-01 | 1.5E-01 | 1.04 |
| 707 | triacylglycerol                  | TG(54:5) [NL-20:4]              | 0.96 | 0.68 | 1.35 | 8.02E-01 | 1.0E-01 | 0.89 |
| 708 | sulfatide                        | Sulfatide (d18:1-/24:0)         | 0.97 | 0.77 | 1.22 | 8.02E-01 | 4.2E-01 | 0.93 |
| 709 | alkenylphosphatidylcholine       | PC(P-38:5) (b)                  | 1.04 | 0.73 | 1.49 | 8.08E-01 | 2.2E-02 | 1.14 |
| 710 | monohexosylceramide              | HexCer(d16:1/24:0)              | 0.95 | 0.64 | 1.42 | 8.12E-01 | 7.6E-01 | 1.02 |
| 711 | phosphatidylcholine              | PC(39:5)(a)                     | 1.04 | 0.76 | 1.42 | 8.17E-01 | 9.1E-01 | 1.01 |
| 712 | lysophosphatidylcholine          | LPC(22:6) [sn1]                 | 0.96 | 0.69 | 1.35 | 8.22E-01 | 5.3E-01 | 0.96 |
| 713 | triacylglycerol                  | TG(52:4) [NL-18:3]              | 0.96 | 0.65 | 1.41 | 8.25E-01 | 5.4E-06 | 0.79 |
| 714 | desmosterol                      | DE(16:0)                        | 0.97 | 0.77 | 1.23 | 8.25E-01 | 8.0E-02 | 1.17 |
| 715 | lysophosphatidylcholine          | LPC(18:1) [sn1]                 | 0.94 | 0.52 | 1.68 | 8.26E-01 | 2.1E-01 | 1.05 |
| 716 | cholesterol ester                | CE(20:4) [+OH]                  | 0.98 | 0.81 | 1.19 | 8.26E-01 | 6.0E-02 | 1.23 |
| 717 | phosphatidylethanolamine         | PE(16:0_16:0)                   | 0.97 | 0.73 | 1.29 | 8.27E-01 | 2.3E-05 | 0.75 |
| 718 | cholesterol ester                | CE(18:1)                        | 1.10 | 0.45 | 2.73 | 8.29E-01 | 1.0E-04 | 1.10 |
| 719 | phosphatidylcholine              | PC(15:0_20:4)                   | 1.04 | 0.72 | 1.51 | 8.32E-01 | 9.7E-01 | 1.00 |
| 720 | lysoalkenylphosphatidylcholine   | LPC(P-18:1)                     | 1.04 | 0.74 | 1.45 | 8.40E-01 | 1.1E-02 | 1.17 |
| 721 | lysophosphatidylcholine          | LPC(20:0) [sn1]                 | 0.96 | 0.62 | 1.48 | 8.41E-01 | 8.1E-01 | 0.99 |
| 722 | cholesterol ester                | CE(24:1)                        | 1.03 | 0.73 | 1.46 | 8.45E-01 | 1.0E-02 | 1.16 |
| 723 | triacylglycerol                  | TG(53:2) [NL-17:1]              | 1.02 | 0.82 | 1.27 | 8.46E-01 | 3.3E-04 | 0.71 |
| 724 | diacylglycerol                   | DG(18:0_20:4)                   | 0.97 | 0.67 | 1.38 | 8.49E-01 | 5.7E-03 | 0.83 |
| 725 | triacylglycerol                  | TG(54:2) [SIM]                  | 1.03 | 0.78 | 1.34 | 8.50E-01 | 1.7E-04 | 0.75 |
| 726 | alkenylphosphatidylcholine       | PC(P-35:2)(a)                   | 0.97 | 0.69 | 1.36 | 8.54E-01 | 1.3E-02 | 1.16 |
| 727 | diacylglycerol                   | DG(18:1_22:6)                   | 1.02 | 0.83 | 1.24 | 8.55E-01 | 3.0E-02 | 0.78 |
| 728 | phosphatidylinositol             | PI(18:0_20:2)                   | 0.96 | 0.65 | 1.44 | 8.58E-01 | 4.2E-01 | 0.96 |
| 729 | diacylglycerol                   | DG(18:1_20:3)                   | 1.02 | 0.81 | 1.30 | 8.60E-01 | 1.3E-03 | 0.75 |
| 730 | phosphatidylethanolamine         | PE(16:0_20:3)                   | 1.03 | 0.75 | 1.42 | 8.61E-01 | 2.4E-03 | 0.82 |
| 731 | monoalkyl diacylglycerol         | TG(O-54:2) [NL-17:1]            | 1.04 | 0.65 | 1.67 | 8.67E-01 | 6.8E-02 | 0.92 |
| 732 | phosphatidylethanolamine         | PE(16:0_18:2)                   | 0.97 | 0.67 | 1.40 | 8.74E-01 | 3.7E-04 | 0.81 |
| 733 | phosphatidylinositol             | PI(39:6)                        | 1.02 | 0.79 | 1.32 | 8.76E-01 | 3.5E-02 | 0.84 |
| 734 | ceramide                         | Cer(d18:1/23:0)                 | 1.05 | 0.56 | 1.97 | 8.83E-01 | 7.7E-01 | 0.99 |
| 735 | phosphatidylcholine              | PC(33:0) (a)                    | 0.96 | 0.57 | 1.62 | 8.85E-01 | 5.3E-01 | 1.03 |
| 736 | lysophosphatidylcholine          | LPC(20:4) [+OH]                 | 1.01 | 0.93 | 1.09 | 8.86E-01 | 5.6E-02 | 1.60 |
| 737 | lysophosphatidylcholine          | LPC(20:4) [sn1]                 | 1.03 | 0.66 | 1.61 | 8.87E-01 | 3.9E-01 | 1.04 |
| 738 | phosphatidic acid                | PA(36:1)                        | 1.03 | 0.72 | 1.47 | 8.91E-01 | 4.9E-01 | 1.05 |
| 739 | monoalkyl diacylglycerol         | TG(O-54:3) [NL-18:1]            | 1.03 | 0.71 | 1.47 | 8.92E-01 | 5.9E-03 | 0.84 |
| 740 | triacylglycerol                  | TG(51:2) [SIM]                  | 0.98 | 0.73 | 1.31 | 8.95E-01 | 3.2E-04 | 0.79 |
| 741 | alkylphosphatidylcholine         | PC(O-16:0/20:4)                 | 0.97 | 0.60 | 1.56 | 8.95E-01 | 8.2E-02 | 1.08 |
| 742 | monohexosylceramide              | HexCer(d16:1/20:0)              | 0.98 | 0.70 | 1.36 | 8.97E-01 | 7.7E-02 | 1.12 |
| 743 | lysophosphatidylcholine          | LPC(20:0) [sn2]                 | 0.97 | 0.64 | 1.49 | 9.04E-01 | 4.8E-01 | 0.96 |
| 744 | ceramide                         | Cer(d18:2/23:0)                 | 0.97 | 0.64 | 1.50 | 9.07E-01 | 6.1E-02 | 0.90 |
| 745 | lysophosphatidylcholine          | LPC(20:4) [sn2]                 | 1.03 | 0.64 | 1.65 | 9.10E-01 | 3.0E-01 | 1.05 |
| 746 | lysoalkylphosphatidylcholine     | LPC(O-22:0)                     | 0.97 | 0.60 | 1.58 | 9.11E-01 | 3.3E-01 | 1.04 |
| 747 | lysoalkenylphosphatidylcholine   | LPC(P-18:0)                     | 0.98 | 0.69 | 1.40 | 9.19E-01 | 3.0E-02 | 1.14 |
| 748 | lysoalkylphosphatidylcholine     | LPC(O-20:0)                     | 0.98 | 0.68 | 1.42 | 9.20E-01 | 1.8E-01 | 1.08 |
| 749 | monohexosylceramide              | HexCer(d16:1/18:0)              | 0.99 | 0.73 | 1.32 | 9.21E-01 | 2.0E-01 | 1.10 |
| 750 | triacylglycerol                  | TG(58:9) [NL-22:6]              | 0.99 | 0.83 | 1.18 | 9.25E-01 | 9.6E-02 | 0.81 |

|     |                                 |                            |      |      |      |          |         |      |
|-----|---------------------------------|----------------------------|------|------|------|----------|---------|------|
| 751 | lysophosphatidylethanolamine    | LPE(22:6) [sn1]            | 1.01 | 0.75 | 1.37 | 9.32E-01 | 7.2E-01 | 0.97 |
| 752 | phosphatidylinositol            | PI(17:0_18:2)              | 0.98 | 0.66 | 1.46 | 9.40E-01 | 9.7E-02 | 0.92 |
| 753 | phosphatidic acid               | PA(34:1)                   | 1.01 | 0.72 | 1.43 | 9.42E-01 | 3.7E-01 | 1.06 |
| 754 | phosphatidylcholine             | PC(18:0_18:2)              | 1.03 | 0.42 | 2.52 | 9.45E-01 | 4.9E-02 | 1.05 |
| 755 | phosphatidylcholine             | PC(18:0_22:6)              | 0.99 | 0.70 | 1.40 | 9.47E-01 | 2.3E-01 | 0.93 |
| 756 | alkenylphosphatidylethanolamine | PE(P-18:1/22:6) (b)        | 0.99 | 0.75 | 1.32 | 9.49E-01 | 9.4E-01 | 0.99 |
| 757 | phosphatidylethanolamine        | PE(18:0_20:3) (b)          | 0.99 | 0.77 | 1.28 | 9.50E-01 | 6.8E-01 | 0.97 |
| 758 | phosphatidylcholine             | PC(18:1_20:3)              | 0.99 | 0.72 | 1.37 | 9.52E-01 | 3.6E-01 | 0.94 |
| 759 | lysophosphatidylcholine         | LPC(19:1) (a)              | 1.02 | 0.62 | 1.67 | 9.52E-01 | 2.5E-02 | 1.10 |
| 760 | phosphatidylethanolamine        | PE(18:0_22:6)              | 0.99 | 0.76 | 1.29 | 9.63E-01 | 1.6E-02 | 0.80 |
| 761 | dihydroceramide                 | Cer(d18:0/18:0)            | 1.00 | 0.82 | 1.21 | 9.64E-01 | 1.1E-03 | 1.42 |
| 762 | triacylglycerol                 | TG(54:2) [NL-18:0]         | 0.99 | 0.79 | 1.25 | 9.66E-01 | 2.0E-04 | 0.72 |
| 763 | lysoalkylphosphatidylcholine    | LPC(O-22:1)                | 1.01 | 0.72 | 1.40 | 9.67E-01 | 2.3E-02 | 1.15 |
| 764 | lysophosphatidylethanolamine    | LPE(17:0) [sn2]            | 1.01 | 0.59 | 1.73 | 9.69E-01 | 1.4E-01 | 1.06 |
| 765 | cholesterol ester               | CE(17:1)                   | 1.01 | 0.70 | 1.45 | 9.74E-01 | 1.3E-06 | 1.32 |
| 766 | sphingomyelin                   | SM(d18:1/22:0)/SM(d16:1/2) | 1.01 | 0.41 | 2.52 | 9.76E-01 | 4.3E-03 | 1.08 |
| 767 | lysoalkylphosphatidylcholine    | LPC(O-24:1)                | 0.99 | 0.67 | 1.48 | 9.78E-01 | 3.5E-02 | 1.12 |
| 768 | phosphatidylglycerol            | PG(36:2)                   | 1.00 | 0.74 | 1.34 | 9.85E-01 | 3.3E-06 | 0.73 |
| 769 | alkenylphosphatidylethanolamine | PE(P-16:0/22:5) (n6)       | 1.00 | 0.72 | 1.39 | 9.95E-01 | 3.5E-01 | 1.06 |
| 770 | triacylglycerol                 | TG(56:8) [NL-20:4]         | 1.00 | 0.84 | 1.20 | 9.97E-01 | 1.9E-02 | 0.76 |
| 771 | lysophosphatidylinositol        | LPI(18:2) [sn1]            | 1.00 | 0.74 | 1.34 | 9.98E-01 | 5.9E-01 | 1.04 |
| 772 | sulfatide                       | Sulfatide (d18:1/16:0(OH)) | 1.00 | 0.70 | 1.42 | 9.99E-01 | 4.9E-02 | 1.12 |

| <b>abbreviation</b> | <b>definition</b>                   |
|---------------------|-------------------------------------|
| AC                  | acylcarnitine                       |
| CE                  | cholesterol ester                   |
| Cer(dx:x/xx:x)      | ceramide                            |
| Cer(dx:0/xx:x)      | dihydroceramide                     |
| Cer(mx:x/xx:x)      | deoxyceramide                       |
| Cer(mx:0/xx:x)      | deoxydihydroceramide                |
| COH                 | cholesterol                         |
| DE                  | desmosterol                         |
| DG                  | diacylglycerol                      |
| FA                  | free fatty acid                     |
| GM1                 | GM1 ganglioside                     |
| GM3                 | GM3 ganglioside                     |
| Hex1Cer             | monohexosylceramide                 |
| Hex2Cer             | dihexosylceramide                   |
| Hex3Cer             | trihexosylceramide                  |
| LPC                 | lysophosphatidylcholine             |
| LPC(O)              | lysoalkylphosphatidylcholine        |
| LPC(P)              | lysoalkenylphosphatidylcholine      |
| LPE                 | lysophosphatidylethanolamine        |
| LPE(P)              | lysoalkenylphosphatidylethanolamine |
| LPI                 | lysophosphatidylinositol            |
| PA                  | phosphatidic acid                   |
| PC                  | phosphatidylcholine                 |
| PC(O)               | alkylphosphatidylcholine            |
| PC(P)               | alkenylphosphatidylcholine          |
| PE                  | phosphatidylethanolamine            |
| PE(O)               | alkylphosphatidylethanolamine       |
| PE(P)               | alkenylphosphatidylethanolamine     |
| PG                  | phosphatidylglycerol                |
| PI                  | phosphatidylinositol                |
| PIP                 | phosphatidylinositol phosphate      |
| PS                  | phosphatidylserine                  |
| S1P                 | sphingosine-1-phosphate             |
| SM                  | sphingomyelin                       |
| Sph                 | sphingosine                         |
| TG                  | triacylglycerol                     |
| TG(O)               | monoalkyl diacylglycerol            |
| [+OH]               | oxidised species                    |
| SIM                 | single ion monitoring method        |
| NL                  | neutral loss method                 |
